# Supplementary material for: B7–H3 regulates osteoclast differentiation via type I interferon-dependent IDO induction
Source: PubMed Central journal article supplement (PMC8528854; doi:10.1038/s41419-021-04275-6), 2021-10-20
Supplement: 41419_2021_4275_MOESM2_ESM.pdf [file 41419_2021_4275_MOESM2_ESM.pdf]

Supplementary Table S1. List of primer sequences used for RT-qPCR analysis.

| RT-qPCR primer sequences |                         |                           |
|--------------------------|-------------------------|---------------------------|
| Gene                     | Forward Primer (5'→3')  | Reverse Primer (5'→3')    |
| <i>B7-H3</i>             | GTCCCTGAGTCCCAGAGT      | GGTCCTCAGTCCTGCATT        |
| <i>CTSK</i>              | CTCTTCCATTTCTTCCACGAT   | ACACCAACTCCCTTCCAAAG      |
| <i>TRAP</i>              | TGGCTTTGCCTATGTGGA      | CCTGGTCTTAAAGAGGGACTT     |
| <i>DC-STAMP</i>          | AAAGCTTGCCAGGGTTTGAG    | GGTTTTGGGATACAGTTGGGTTC   |
| <i>ITGB3</i>             | GGAAGAACGCGCCAGAGCAAATG | CCCCAAATCCCTCCCCACAAATAC  |
| <i>CSF1R</i>             | GGTACTGCTGTAATGAGCCAA   | AGTTTGTGCTTCCTGCTTGGT     |
| <i>RANK</i>              | CCATCATCTTTGGCGTTTG     | AGCTGTGAGTGCTTTCCT        |
| <i>IFNA1</i>             | CCAGTTCAGAAGGCTCCAG     | CCTCTCCTCCTGCATCACAC      |
| <i>IFNB1</i>             | CTAGCACTGGCTGGAATGAGA   | TCCTTGGCCTTCAGGTAATGC     |
| <i>IFNG</i>              | ACCAGAGCATCCAAAAGAGTGT  | TTAGCTGCTGGCGACAGTTC      |
| <i>IL-27A</i>            | CAGACGGCAGGCGACCTT      | GAGATGCAGGCTGACTGTGAA     |
| <i>IL-27B</i>            | GTTCTCCATGGCTCCCTACG    | AAGATCTCTGGGAAGGGCCA      |
| <i>STAT1</i>             | TGGGTTTGACAAGGTTCTT     | TATGCAGTGCACGAAAG         |
| <i>CXCL9</i>             | AGAAAGGGTCGCTGTTCCTG    | TCACATCTGCTGAATCTGGGTT    |
| <i>CXCL10</i>            | TGTACGCTGTACCTGCATCA    | TTGATGGCCTTCGATTCTGGA     |
| <i>CXCL11</i>            | GAAGGATGAAAGGTGGGTGA    | AAGCACTTTGTAAACTCCGATG    |
| <i>IFIT1</i>             | GTGCTTGAAGTGGACCCTGA    | AGCTTCAGGGCAAGGAGAAC      |
| <i>IDO</i>               | TTAGAGTCAAATCCCTCAGTCC  | TTTGCAGATGGTAGCTCCTC      |
| <i>iNOS</i>              | AATGTGGAGAAAGCCCCCTG    | TGCATCCAGCTTGACCAGAG      |
| <i>SOCS1</i>             | CTTCGACTGCCTTTTCGAGC    | GGAGTACCGGGTTAAGAGGG      |
| <i>CD80</i>              | TGGTGCTGGCTGGTCTTTC     | CTGTGCCACTTCTTTCACTTCC    |
| <i>CD86</i>              | ACATTCTCTTTGTGATGGCCTTC | TGCAGTCTCATTGAAATAAGCTTGA |
| <i>GAPDH</i>             | CAAGATCATCAGCAATGCC     | CTGTGGTCATGAGTCCTTCC      |
| <i>mB7-H3</i>            | GACACGGATGCCACCCTACGCTG | CTGTGATGGTGACTGAGCCGTGAG  |
| <i>mCtsk</i>             | TGGAGGCGGCTATATGACCA    | CCTTTGCCGTGGCGTTATAC      |
| <i>mAcp5</i>             | ACGGCTACTTGC GGTTTC     | TCCTTGGGAGGCTGGTC         |
| <i>mDstamp</i>           | TCCTCCATGAACAAACAGTT    | AGACGTGGTTTAGGAATGCA      |
