# Supplementary material for: B7–H3 regulates osteoclast differentiation via type I interferon-dependent IDO induction
Source: PubMed Central journal article supplement (PMC8528854; doi:10.1038/s41419-021-04275-6), 2021-10-20
Supplement: 41419_2021_4275_MOESM3_ESM.pdf [file 41419_2021_4275_MOESM3_ESM.pdf]

| ctsinfo         | B7-H3 0 day vs CTL 0day<br>log2FoldChange | B7-H3 0 day vs CTL<br>0day_pvalue | B7-H3 0 day vs CTL<br>0day_padj | CTL 0 day_1_CPM | CTL 0 day_2_CPM | B7-H3 0 day_1_CPM | B7-H3 0 day_2_CPM |
|-----------------|-------------------------------------------|-----------------------------------|---------------------------------|-----------------|-----------------|-------------------|-------------------|
| TMED7-TICAM2    | 23.20851645                               | 3.93E-13                          | 3.35E-11                        | 0.00078358      | 0.000878761     | 0.000630753       | 21.55160373       |
| C7orf55-LUC7L2  | 23.03820372                               | 1.48E-06                          | 2.66E-05                        | 0.00078358      | 0.000878761     | 20.31088975       | 0.000708911       |
| RIPOR2          | 10.64415941                               | 2.06E-12                          | 1.42E-10                        | 0.00078358      | 0.000878761     | 19.11245832       | 19.70843509       |
| GSDMA           | 9.492581868                               | 1.11E-10                          | 5.43E-09                        | 0.00078358      | 0.000878761     | 8.074274082       | 9.429225394       |
| CACNA1I         | 8.371750727                               | 1.82E-06                          | 3.19E-05                        | 0.00078358      | 0.000878761     | 4.605130464       | 3.403481777       |
| SETDB2-PHF11    | 8.200997218                               | 6.91E-06                          | 0.000103271                     | 0.00078358      | 0.000878761     | 3.659000387       | 3.474372879       |
| EDARADD         | 8.131298552                               | 9.50E-07                          | 1.83E-05                        | 0.00078358      | 0.000878761     | 3.53284971        | 3.261699574       |
| CSAG3           | 8.014063299                               | 1.24E-05                          | 0.000168775                     | 0.00078358      | 0.000878761     | 3.217473017       | 3.04902627        |
| TNFSF12-TNFSF13 | 7.977940647                               | 0.009175242                       | 0.040917158                     | 0.00078358      | 0.000878761     | 5.109733172       | 0.922293229       |
| OSBPL10         | 7.622598628                               | 3.10E-06                          | 5.11E-05                        | 0.00078358      | 0.000878761     | 2.775945648       | 1.98565975        |
| TMEM171         | 7.614549761                               | 2.77E-05                          | 0.000331551                     | 0.00078358      | 0.000878761     | 2.208267601       | 2.552788561       |
| MIR6087         | 7.544021517                               | 1.09E-06                          | 2.07E-05                        | 0.00078358      | 0.264507145     | 3.974377079       | 34.73734859       |
| SBK1            | 7.386803575                               | 0.000308133                       | 0.002574796                     | 0.00078358      | 0.000878761     | 2.208267601       | 1.843877547       |
| SCUBE2          | 7.353250385                               | 5.00E-05                          | 0.000553731                     | 0.00078358      | 0.000878761     | 2.523644294       | 1.418530939       |
| CR1L            | 7.279041756                               | 0.000187867                       | 0.001701712                     | 0.00078358      | 0.000878761     | 1.514438878       | 2.269224155       |
| PLEKHH1         | 7.156577317                               | 2.82E-05                          | 0.00033599                      | 0.00078358      | 0.000878761     | 1.892890909       | 1.560313141       |
| SRD5A3-AS1      | 7.019767321                               | 0.000360562                       | 0.002941362                     | 0.00078358      | 0.000878761     | 1.451363539       | 1.702095344       |
| LIFR            | 6.992321918                               | 0.001711531                       | 0.010479046                     | 0.00078358      | 0.000878761     | 1.325212862       | 1.772986445       |
| ELAVL4          | 6.921078322                               | 0.000154883                       | 0.001441083                     | 0.00078358      | 0.000878761     | 1.451363539       | 1.48942204        |
| KCTD14          | 6.818650478                               | 2.58E-08                          | 7.06E-07                        | 0.157499592     | 0.000878761     | 6.938917989       | 7.798730063       |
| GPR85           | 6.567123503                               | 5.66E-05                          | 0.000613733                     | 0.00078358      | 0.000878761     | 0.694459477       | 1.631204243       |
| ADD2            | 6.554691465                               | 0.006395832                       | 0.030827739                     | 0.00078358      | 0.000878761     | 1.009836169       | 1.276748736       |
| TNFSF18         | 6.551501329                               | 0.001953809                       | 0.011650999                     | 0.00078358      | 0.000878761     | 1.072911508       | 1.205857634       |
| RHPN1-AS1       | 6.480652863                               | 0.003681074                       | 0.019681951                     | 0.00078358      | 0.000878761     | 0.694459477       | 1.48942204        |

|              |             |             |             |             |             |             |             |
|--------------|-------------|-------------|-------------|-------------|-------------|-------------|-------------|
| MDGA1        | 6.410263806 | 0.000217974 | 0.001916978 | 0.00078358  | 0.000878761 | 1.135986847 | 0.922293229 |
| ANKRD53      | 6.409515245 | 0.008562012 | 0.038793843 | 0.00078358  | 0.000878761 | 1.135986847 | 0.922293229 |
| CACNA1A      | 6.318042767 | 0.000148792 | 0.001392488 | 0.862721647 | 0.000878761 | 27.81685503 | 27.22289184 |
| 44078        | 6.308701927 | 6.08E-20    | 2.19E-17    | 0.627647628 | 0.000878761 | 21.76162254 | 19.28308849 |
| ATL1         | 6.271296034 | 0.000732418 | 0.005268953 | 0.00078358  | 0.000878761 | 0.883685492 | 0.99318433  |
| FAM26F       | 6.179024847 | 5.14E-08    | 1.31E-06    | 0.157499592 | 3.340171616 | 109.057891  | 91.02488308 |
| TTC39A       | 6.167976515 | 5.33E-05    | 0.000584198 | 0.00078358  | 0.000878761 | 0.694459477 | 1.064075432 |
| HEYL         | 6.156641313 | 0.001144262 | 0.007592113 | 0.00078358  | 0.000878761 | 0.946760831 | 0.780511026 |
| LOC102723753 | 6.145284016 | 0.000812421 | 0.005699354 | 0.00078358  | 0.000878761 | 1.135986847 | 0.567837722 |
| TRIL         | 6.127966097 | 7.24E-06    | 0.000107116 | 0.157499592 | 0.000878761 | 3.785151064 | 5.317541514 |
| ZNF391       | 6.093449354 | 0.002231005 | 0.013081834 | 0.00078358  | 0.000878761 | 1.009836169 | 0.638728823 |
| MAST4        | 6.052582602 | 7.42E-05    | 0.000780809 | 0.00078358  | 0.000878761 | 0.631384138 | 0.99318433  |
| CTH          | 6.04486908  | 0.000575233 | 0.004314544 | 0.00078358  | 0.000878761 | 0.820610154 | 0.780511026 |
| CLEC4G       | 5.967711618 | 0.002234391 | 0.013091554 | 0.00078358  | 0.000878761 | 1.009836169 | 0.496946621 |
| DUXAP10      | 5.945753547 | 0.001896201 | 0.011377993 | 0.00078358  | 0.000878761 | 0.379082784 | 1.134966533 |
| TDO2         | 5.840238228 | 0.001349165 | 0.008680247 | 0.00078358  | 0.000878761 | 0.883685492 | 0.496946621 |
| CEP112       | 5.766097428 | 0.002679326 | 0.015192671 | 0.00078358  | 0.000878761 | 0.883685492 | 0.426055519 |
| ASAH2B       | 5.719139681 | 0.001732327 | 0.010566022 | 0.00078358  | 0.000878761 | 0.505233461 | 0.780511026 |
| TGFB2        | 5.717457765 | 0.000462381 | 0.003606824 | 0.00078358  | 0.000878761 | 0.505233461 | 0.780511026 |
| TMEM154      | 5.714353958 | 0.002663324 | 0.015113812 | 0.00078358  | 0.000878761 | 0.5683088   | 0.709619925 |
| TIMD4        | 5.571435284 | 4.57E-05    | 0.000511922 | 1.646301707 | 0.000878761 | 36.52125175 | 25.80506981 |
| PLEKHB1      | 5.537675176 | 0.002468925 | 0.014240229 | 0.00078358  | 0.000878761 | 0.694459477 | 0.426055519 |
| ANKRD22      | 5.522790651 | 1.76E-05    | 0.000227081 | 0.00078358  | 1.319020678 | 27.24917699 | 20.34645501 |
| CARD14       | 5.346559204 | 0.001692333 | 0.010392367 | 0.00078358  | 0.000878761 | 0.757534815 | 0.213382215 |
| KLHDC7B      | 5.32986884  | 5.38E-21    | 2.28E-18    | 1.254511677 | 0.176631017 | 24.9784648  | 21.69338593 |
| LINC02099    | 5.258731691 | 0.003361741 | 0.018222435 | 0.00078358  | 0.000878761 | 0.5683088   | 0.355164418 |
| PHYHD1       | 5.250888514 | 0.00731367  | 0.03417862  | 0.00078358  | 0.000878761 | 0.631384138 | 0.284273317 |

|             |             |             |             |             |             |             |             |
|-------------|-------------|-------------|-------------|-------------|-------------|-------------|-------------|
| IL27        | 5.201750584 | 3.99E-26    | 3.84E-23    | 3.683609864 | 0.616011656 | 68.62659905 | 58.27319424 |
| INPP4B      | 5.181390611 | 0.001600103 | 0.009913337 | 0.00078358  | 0.000878761 | 0.189856769 | 0.709619925 |
| GCSAML-AS1  | 5.174684257 | 0.006707485 | 0.03192634  | 0.00078358  | 0.000878761 | 0.316007446 | 0.567837722 |
| SOCS2       | 5.167822314 | 0.008348693 | 0.037986012 | 0.00078358  | 0.000878761 | 0.379082784 | 0.496946621 |
| PROS1       | 5.161761455 | 0.000852752 | 0.005922071 | 0.00078358  | 0.000878761 | 0.442158123 | 0.426055519 |
| DEFB1       | 4.931011541 | 6.95E-13    | 5.67E-11    | 1.097795665 | 0.176631017 | 17.85095155 | 13.47001817 |
| GREB1       | 4.913820446 | 0.003316847 | 0.018041997 | 0.00078358  | 0.000878761 | 0.442158123 | 0.284273317 |
| HAPLN3      | 4.909593268 | 7.44E-20    | 2.56E-17    | 1.332869683 | 0.4402594   | 24.28463608 | 18.50328637 |
| SOCS1       | 4.890524273 | 4.01E-18    | 9.48E-16    | 1.254511677 | 0.352383272 | 17.66172554 | 20.84269272 |
| CXCL11      | 4.885776219 | 0.000417953 | 0.003317645 | 68.32896485 | 2.285658083 | 807.8695664 | 851.6155098 |
| FOXD4       | 4.825139075 | 0.001628054 | 0.010057553 | 0.157499592 | 0.000878761 | 1.135986847 | 2.552788561 |
| SNX7        | 4.813992504 | 1.86E-16    | 2.86E-14    | 1.019437659 | 0.000878761 | 12.04802041 | 11.55595844 |
| CXCL10      | 4.802065371 | 0.000132908 | 0.001267673 | 558.4582926 | 25.92433645 | 5775.998604 | 7203.174629 |
| IFNB1       | 4.76543831  | 2.12E-09    | 7.77E-08    | 0.39257361  | 0.352383272 | 8.074274082 | 8.011403367 |
| ST3GAL5-AS1 | 4.7535722   | 0.000639502 | 0.004704474 | 0.157499592 | 0.000878761 | 2.334418278 | 1.134966533 |
| NEXN        | 4.732260428 | 4.81E-05    | 0.000534432 | 5.642560015 | 0.352383272 | 54.37157255 | 72.80587003 |
| KCNA3       | 4.682957413 | 0.005051557 | 0.025480258 | 0.157499592 | 0.000878761 | 1.262137524 | 2.056550851 |
| NUPR1       | 4.617397958 | 4.95E-08    | 1.27E-06    | 104.0602156 | 17.2245998  | 1304.903234 | 1055.427426 |
| TNFSF10     | 4.611638124 | 3.27E-05    | 0.000381491 | 160.3996219 | 11.60052763 | 1608.043311 | 1735.131306 |
| AK5         | 4.460053452 | 0.003876381 | 0.020566195 | 0.00078358  | 0.000878761 | 0.379082784 | 0.142491114 |
| STAG3       | 4.452237393 | 2.83E-28    | 4.54E-25    | 1.332869683 | 1.670525189 | 24.03233472 | 28.07358506 |
| ALK         | 4.437537244 | 1.41E-05    | 0.000188327 | 0.314215604 | 0.000878761 | 1.892890909 | 3.757937284 |
| BATF3       | 4.366569083 | 0.007460467 | 0.034740232 | 2.038091737 | 0.000878761 | 18.54478027 | 14.8878402  |
| IDO1        | 4.363213466 | 0.003058648 | 0.016972315 | 13.32164461 | 2.900790978 | 126.6559105 | 138.8763765 |
| RET         | 4.331977577 | 1.57E-27    | 2.06E-24    | 2.821671798 | 1.758401317 | 34.3136149  | 39.41616128 |
| ABTB2       | 4.229272065 | 7.18E-12    | 4.51E-10    | 1.724659713 | 0.4402594   | 14.12950658 | 18.57417747 |
| APOBEC3A    | 4.228790242 | 0.001843992 | 0.01112546  | 63.70584249 | 2.109905828 | 522.4536596 | 456.681184  |

|            |             |             |             |             |             |             |             |
|------------|-------------|-------------|-------------|-------------|-------------|-------------|-------------|
| SMPD3      | 4.208436948 | 1.99E-06    | 3.47E-05    | 0.314215604 | 0.528135528 | 7.191219343 | 5.033977109 |
| EIF5AL1    | 4.157276639 | 6.29E-09    | 2.07E-07    | 0.235857598 | 0.352383272 | 3.659000387 | 4.608630501 |
| NT5C3A     | 4.075800521 | 2.04E-05    | 0.000255154 | 71.14985306 | 8.261234771 | 468.0827178 | 598.4633867 |
| CLMP       | 4.04782631  | 0.000229    | 0.002001635 | 0.00078358  | 0.4402594   | 1.955966247 | 3.687046183 |
| IFIT2      | 4.007953001 | 0.00048797  | 0.003773791 | 588.782841  | 42.26929622 | 3525.848978 | 4559.787241 |
| IFIT1      | 3.982364224 | 1.08E-05    | 0.000151782 | 1193.863364 | 96.84037156 | 7776.622191 | 8442.421972 |
| GBP4       | 3.942532459 | 0.000173493 | 0.00158964  | 26.1723576  | 2.373534211 | 153.8413814 | 195.8019309 |
| PMAIP1     | 3.917266523 | 4.90E-17    | 8.84E-15    | 2.273165755 | 2.373534211 | 27.18610165 | 28.56982277 |
| ETV7       | 3.903047628 | 0.000537358 | 0.004098631 | 18.80670503 | 1.934153572 | 128.1066433 | 118.3179571 |
| ASCL2      | 3.868354387 | 3.06E-06    | 5.06E-05    | 11.28433645 | 2.197781955 | 84.14313232 | 72.23874122 |
| HSH2D      | 3.854837117 | 0.001504728 | 0.009445291 | 21.62759325 | 1.143268422 | 140.7847863 | 120.6573635 |
| APOBEC3B   | 3.824290943 | 3.78E-19    | 1.11E-16    | 11.9895585  | 3.515923872 | 91.1444949  | 83.79399074 |
| FRMD3      | 3.77843569  | 5.22E-10    | 2.18E-08    | 2.351523761 | 0.4402594   | 13.87720522 | 16.94368214 |
| KIAA0040   | 3.772834782 | 9.80E-62    | 1.41E-57    | 17.47461893 | 11.86415601 | 144.5062313 | 175.3852937 |
| PIK3CD-AS1 | 3.743851347 | 0.000731247 | 0.00526578  | 0.78436364  | 0.000878761 | 4.163603095 | 4.325066095 |
| CCL5       | 3.671094643 | 3.23E-25    | 2.59E-22    | 27.19101168 | 9.755128943 | 190.6773791 | 183.7504437 |
| LINC00996  | 3.634816292 | 1.39E-06    | 2.52E-05    | 0.941079653 | 0.352383272 | 6.560465958 | 6.310016934 |
| CH25H      | 3.616610941 | 0.003396927 | 0.018373709 | 0.00078358  | 0.528135528 | 1.325212862 | 3.757937284 |
| HESX1      | 3.569893266 | 0.000340721 | 0.002804239 | 15.04552074 | 1.494772933 | 77.70944779 | 78.47715814 |
| GBP1       | 3.553543012 | 2.29E-05    | 0.000281236 | 118.3997307 | 20.56389266 | 572.9770058 | 726.3509336 |
| GCH1       | 3.528631901 | 2.20E-05    | 0.000272998 | 35.2618863  | 6.415836088 | 167.3395038 | 215.8641126 |
| FOXC1      | 3.52244308  | 0.000467832 | 0.003643438 | 0.470931616 | 0.264507145 | 2.523644294 | 4.254174994 |
| STAP2      | 3.467283159 | 0.002547308 | 0.014610572 | 0.00078358  | 0.176631017 | 0.883685492 | 0.567837722 |
| USP30-AS1  | 3.455944941 | 7.85E-09    | 2.53E-07    | 3.605251858 | 1.23114455  | 26.74457428 | 15.38407791 |
| CYP19A1    | 3.424212822 | 1.89E-06    | 3.31E-05    | 1.646301707 | 0.176631017 | 7.885048067 | 7.869621164 |
| TMEM229B   | 3.423803712 | 7.60E-05    | 0.000796002 | 17.1611869  | 2.461410339 | 84.39543368 | 83.01418862 |
| MDK        | 3.417910035 | 5.64E-05    | 0.000611673 | 17.1611869  | 2.81291485  | 98.71353552 | 70.46646368 |

|           |             |             |             |             |             |             |             |
|-----------|-------------|-------------|-------------|-------------|-------------|-------------|-------------|
| IL1RN     | 3.362616926 | 3.94E-38    | 1.90E-34    | 517.0069074 | 300.0978551 | 2968.893739 | 3723.059571 |
| CD274     | 3.362484125 | 8.23E-18    | 1.92E-15    | 13.79179264 | 4.921941916 | 68.75274973 | 84.92824836 |
| ISG20     | 3.359365255 | 0.001565249 | 0.009757551 | 132.4258138 | 11.77627988 | 670.1761024 | 502.2641622 |
| PDCD1     | 3.32874623  | 4.08E-13    | 3.47E-11    | 0.706005634 | 0.967516167 | 7.001993328 | 6.239125832 |
| LINC01010 | 3.320646978 | 0.000352415 | 0.002887959 | 0.00078358  | 0.616011656 | 2.397493617 | 2.340115256 |
| PRLR      | 3.312009022 | 1.28E-07    | 3.01E-06    | 2.586597779 | 0.791763911 | 10.91266432 | 16.02209782 |
| CCL8      | 3.310128596 | 0.000559271 | 0.004223357 | 575.618696  | 66.08372684 | 2285.28322  | 2780.633269 |
| DSP       | 3.299044031 | 5.12E-05    | 0.000564865 | 0.862721647 | 0.352383272 | 4.478979787 | 5.10486821  |
| GBP5      | 3.289806179 | 3.46E-05    | 0.000399798 | 14.96716273 | 3.252295489 | 68.75274973 | 73.01854333 |
| OTOF      | 3.287009031 | 0.002246193 | 0.013124162 | 21.86266727 | 5.712827066 | 118.8345685 | 94.56943815 |
| AMIGO2    | 3.272140642 | 0.003555206 | 0.019103941 | 0.157499592 | 0.176631017 | 1.135986847 | 1.418530939 |
| CDKL1     | 3.270443129 | 0.003324585 | 0.018075847 | 0.78436364  | 0.000878761 | 2.586719632 | 3.54526398  |
| P3H2      | 3.252615741 | 4.24E-06    | 6.69E-05    | 0.00078358  | 0.528135528 | 2.082116924 | 1.702095344 |
| LINC01296 | 3.247501817 | 0.004796452 | 0.024432617 | 0.39257361  | 0.000878761 | 1.009836169 | 2.056550851 |
| LINC00537 | 3.230994267 | 1.26E-11    | 7.48E-10    | 3.840325876 | 1.494772933 | 21.19394449 | 18.78685078 |
| PTPRU     | 3.230188848 | 2.74E-09    | 9.85E-08    | 3.683609864 | 1.319020678 | 20.81549246 | 16.58922663 |
| HES1      | 3.221373889 | 9.52E-09    | 2.96E-07    | 1.959733731 | 5.712827066 | 40.24269672 | 15.88031562 |
| IFIT3     | 3.211747346 | 6.37E-05    | 0.000685028 | 900.882779  | 126.8940073 | 3547.042292 | 4026.686158 |
| SAMD4A    | 3.208461505 | 3.64E-15    | 4.52E-13    | 32.83278811 | 9.315748304 | 146.3354161 | 163.9718264 |
| LINC01358 | 3.177338516 | 0.007577115 | 0.035159277 | 0.627647628 | 0.000878761 | 2.523644294 | 2.056550851 |
| OASL      | 3.14650424  | 0.000180912 | 0.001647156 | 199.735341  | 32.0756654  | 804.4634981 | 826.7327332 |
| ENDOD1    | 3.139687639 | 1.01E-14    | 1.16E-12    | 15.90745881 | 4.482561277 | 68.18507168 | 75.14527637 |
| NFIX      | 3.122231009 | 9.93E-05    | 0.00098961  | 2.194807749 | 0.352383272 | 8.137349421 | 9.641898698 |
| SERPING1  | 3.115261515 | 0.000321227 | 0.002670291 | 76.08640745 | 11.24902312 | 311.1512756 | 289.7326402 |
| IL15RA    | 3.111078193 | 5.04E-13    | 4.23E-11    | 24.84027149 | 6.152207705 | 106.7241035 | 106.4082521 |
| ELL3      | 3.105166344 | 0.000638983 | 0.004704474 | 1.411227689 | 0.967516167 | 6.560465958 | 9.783680901 |
| SELL      | 3.102026217 | 7.89E-16    | 1.09E-13    | 21.15744521 | 6.591588344 | 90.63989219 | 99.24825084 |

|          |             |             |             |             |             |             |             |
|----------|-------------|-------------|-------------|-------------|-------------|-------------|-------------|
| RARRES3  | 3.101640209 | 0.000211576 | 0.001872015 | 18.414915   | 3.252295489 | 83.19700224 | 64.29893786 |
| MEFV     | 3.1005593   | 3.55E-06    | 5.76E-05    | 2.821671798 | 0.528135528 | 11.03881499 | 11.98130504 |
| GPBAR1   | 3.083844295 | 3.21E-21    | 1.40E-18    | 20.84401319 | 12.12778439 | 124.700575  | 97.1215178  |
| C8orf31  | 3.068956206 | 7.78E-05    | 0.000811292 | 0.78436364  | 0.264507145 | 3.659000387 | 3.403481777 |
| PLA2G16  | 3.064096639 | 7.05E-16    | 9.88E-14    | 17.39626092 | 7.294597366 | 91.20757023 | 72.80587003 |
| DDX58    | 3.058520521 | 4.63E-05    | 0.000516474 | 152.9556114 | 33.13017893 | 562.8849516 | 670.9140924 |
| AXL      | 3.055271104 | 0.000465667 | 0.003628531 | 50.30662346 | 7.382473493 | 171.7547775 | 210.0510423 |
| ZNF702P  | 3.031405467 | 2.64E-06    | 4.47E-05    | 2.038091737 | 0.703887783 | 7.569671374 | 10.42170081 |
| IGFBP4   | 3.027288417 | 1.35E-17    | 2.90E-15    | 134.93327   | 47.71761614 | 610.2545308 | 572.3754614 |
| GLT1D1   | 3.024003776 | 2.06E-12    | 1.42E-10    | 4.937337961 | 3.428047744 | 31.22292331 | 22.75675245 |
| IGF2BP3  | 3.01383187  | 2.11E-11    | 1.20E-09    | 3.213461828 | 1.670525189 | 13.24645184 | 18.36150417 |
| RSAD2    | 2.996468313 | 0.000210652 | 0.001866122 | 1269.870629 | 170.744195  | 4105.259037 | 5046.171087 |
| CCNA1    | 2.955866694 | 1.20E-09    | 4.66E-08    | 4.623905936 | 1.934153572 | 19.238609   | 21.40982153 |
| ZNF618   | 2.933369415 | 4.45E-10    | 1.89E-08    | 2.97838781  | 1.143268422 | 10.28191093 | 15.0296224  |
| SECTM1   | 2.926946582 | 2.41E-06    | 4.12E-05    | 238.0524059 | 73.90470221 | 993.3741369 | 889.3295757 |
| TLR7     | 2.923963293 | 5.30E-32    | 1.53E-28    | 11.28433645 | 8.788491538 | 56.38998338 | 65.00784887 |
| PRICKLE1 | 2.919908054 | 0.008033556 | 0.036815574 | 0.706005634 | 0.000878761 | 2.397493617 | 1.914768648 |
| FN3K     | 2.919251447 | 1.40E-05    | 0.000188084 | 0.78436364  | 0.000878761 | 2.208267601 | 2.694570763 |
| PLEKHA4  | 2.916746783 | 3.22E-09    | 1.13E-07    | 4.310473912 | 2.0220297   | 21.44624585 | 16.58922663 |
| IRF4     | 2.894775554 | 0.001600125 | 0.009913337 | 1.332869683 | 0.703887783 | 5.425109865 | 6.664472441 |
| HPSE     | 2.87955069  | 1.60E-18    | 4.21E-16    | 92.93337874 | 35.41495825 | 371.3251485 | 379.6225568 |
| APOBEC3D | 2.878435085 | 8.50E-07    | 1.65E-05    | 2.508239773 | 0.791763911 | 9.777308222 | 9.641898698 |
| COL9A2   | 2.868913624 | 6.50E-08    | 1.63E-06    | 1.332869683 | 1.758401317 | 11.79571905 | 5.955561427 |
| NEURL3   | 2.861470851 | 1.14E-10    | 5.56E-09    | 13.08657059 | 3.867428383 | 49.45169614 | 48.70289556 |
| FAS      | 2.858984224 | 3.17E-11    | 1.75E-09    | 4.858979955 | 3.955304511 | 23.96925939 | 26.93932743 |
| EXOC3L1  | 2.858340657 | 5.98E-06    | 9.09E-05    | 3.997041888 | 1.143268422 | 17.78787621 | 11.83952284 |
| GAREM1   | 2.851090469 | 0.0016635   | 0.010245828 | 3.056745816 | 0.4402594   | 8.705027467 | 11.48506733 |

|              |             |             |             |             |             |             |             |
|--------------|-------------|-------------|-------------|-------------|-------------|-------------|-------------|
| ANXA2R       | 2.826507033 | 1.26E-05    | 0.000171279 | 2.664955785 | 0.791763911 | 11.03881499 | 8.507641076 |
| FPR2         | 2.825864263 | 8.09E-09    | 2.58E-07    | 3.605251858 | 1.494772933 | 12.93107515 | 16.02209782 |
| USP18        | 2.814178225 | 0.001204974 | 0.007907677 | 120.2803229 | 17.57610431 | 377.3173057 | 393.3045394 |
| ISG15        | 2.813278261 | 0.001744478 | 0.010635643 | 2593.964216 | 265.1231562 | 9271.444638 | 6640.795522 |
| CKB          | 2.800343386 | 2.84E-20    | 1.10E-17    | 12.06791651 | 6.415836088 | 57.39918879 | 44.94566718 |
| CDKN1C       | 2.797338289 | 3.32E-11    | 1.82E-09    | 3.135103822 | 3.515923872 | 17.85095155 | 18.85774188 |
| TAP1         | 2.791407966 | 3.96E-41    | 2.86E-37    | 164.3958803 | 121.7971918 | 796.0114027 | 777.8887643 |
| LOC100128993 | 2.7836609   | 3.78E-06    | 6.09E-05    | 2.038091737 | 1.494772933 | 7.948123405 | 11.48506733 |
| GVINP1       | 2.769699215 | 9.12E-05    | 0.000919487 | 2.429881767 | 0.616011656 | 6.749691974 | 9.925463104 |
| SAMD9        | 2.767258625 | 0.000371788 | 0.003015895 | 101.1609694 | 20.56389266 | 270.5938329 | 390.1853309 |
| ACTA2        | 2.761532372 | 5.88E-11    | 3.01E-09    | 1.881375725 | 2.637162594 | 12.86799981 | 11.34328513 |
| PTCH2        | 2.736765343 | 0.001149755 | 0.007618048 | 0.941079653 | 0.352383272 | 3.154397679 | 3.757937284 |
| APOBEC3G     | 2.732724502 | 4.27E-05    | 0.000483122 | 49.5230434  | 12.56716503 | 162.1042507 | 165.9567772 |
| LOC100506388 | 2.730895823 | 0.000749767 | 0.005364344 | 2.508239773 | 0.616011656 | 8.263500098 | 8.294967772 |
| JAK2         | 2.728405678 | 3.33E-12    | 2.20E-10    | 24.9186295  | 10.72176635 | 74.74490688 | 113.9227088 |
| GOLM1        | 2.72801792  | 0.003790829 | 0.020174194 | 23.35146938 | 2.725038722 | 65.97743483 | 71.4589391  |
| RABGAP1L     | 2.724614271 | 2.34E-16    | 3.53E-14    | 54.06780775 | 20.73964491 | 195.7234061 | 197.5033174 |
| IL15         | 2.724522122 | 2.57E-07    | 5.67E-06    | 4.310473912 | 1.670525189 | 14.44488327 | 17.15635544 |
| TCN2         | 2.721615321 | 1.68E-12    | 1.23E-10    | 78.67222164 | 23.37592875 | 290.0841125 | 244.078771  |
| IFIH1        | 2.717784982 | 8.73E-05    | 0.000888173 | 173.4070509 | 40.42389753 | 519.4260434 | 599.7394266 |
| GBP3         | 2.715217685 | 2.24E-15    | 2.91E-13    | 34.63502225 | 16.69734304 | 114.6715962 | 154.1888544 |
| VAMP5        | 2.70875831  | 0.000304849 | 0.002553329 | 50.54169748 | 12.74291729 | 200.1386798 | 127.1793448 |
| TNFSF15      | 2.706494566 | 1.45E-18    | 3.88E-16    | 5.955992039 | 5.976455449 | 28.5737591  | 33.39041766 |
| PPDPF        | 2.705313833 | 4.58E-25    | 3.48E-22    | 43.56783494 | 26.53946935 | 199.6340771 | 163.1920243 |
| ITGA2        | 2.696159716 | 0.000104081 | 0.001026976 | 0.00078358  | 0.791763911 | 1.262137524 | 2.694570763 |
| BATF2        | 2.690076965 | 0.000425291 | 0.00336595  | 54.06780775 | 10.98539473 | 165.6364697 | 168.0126192 |
| EXT1         | 2.68803846  | 5.04E-22    | 2.70E-19    | 4.310473912 | 3.164419361 | 18.79708163 | 19.63754399 |

|             |             |             |             |             |             |             |             |
|-------------|-------------|-------------|-------------|-------------|-------------|-------------|-------------|
| ATP10A      | 2.680726477 | 6.66E-09    | 2.18E-07    | 19.98207512 | 4.570437405 | 57.96686684 | 67.55992852 |
| SLC27A3     | 2.678537792 | 5.95E-19    | 1.65E-16    | 16.29924884 | 10.37026184 | 73.92492748 | 61.67596711 |
| LYSMD2      | 2.677501188 | 1.19E-18    | 3.24E-16    | 21.47087724 | 10.72176635 | 83.00777623 | 80.88745558 |
| XRN1        | 2.674214812 | 1.62E-12    | 1.19E-10    | 21.70595125 | 8.788491538 | 60.86833241 | 94.71122035 |
| KIF17       | 2.674002269 | 0.00194484  | 0.011611911 | 0.627647628 | 0.352383272 | 2.712870309 | 2.269224155 |
| ADPGK-AS1   | 2.657780247 | 0.000268375 | 0.002286259 | 0.862721647 | 1.406896806 | 5.929712573 | 5.388432616 |
| GRIN3A      | 2.654909028 | 3.00E-08    | 8.02E-07    | 7.679868172 | 2.725038722 | 23.90618405 | 28.42804056 |
| BRIP1       | 2.651320839 | 5.36E-07    | 1.10E-05    | 2.900029804 | 1.319020678 | 8.768102806 | 12.47754275 |
| TGM1        | 2.649673298 | 6.74E-06    | 0.000100937 | 2.508239773 | 1.494772933 | 11.98494507 | 7.940512265 |
| PALM2-AKAP2 | 2.621473253 | 2.94E-21    | 1.32E-18    | 19.82535911 | 16.69734304 | 72.15881801 | 107.1880542 |
| FXVD6       | 2.620840524 | 4.60E-12    | 2.98E-10    | 62.21704038 | 20.21238815 | 217.2951719 | 185.1682657 |
| MAP2K6      | 2.60490376  | 0.003766397 | 0.020063813 | 0.941079653 | 0.000878761 | 1.82981557  | 2.836352966 |
| SPN         | 2.580215983 | 2.42E-20    | 9.71E-18    | 7.053004124 | 12.4792889  | 49.57784682 | 42.74804304 |
| TAGLN       | 2.579383985 | 1.30E-08    | 3.86E-07    | 3.918683882 | 1.758401317 | 15.39101335 | 11.62684954 |
| FGL2        | 2.576894919 | 4.64E-12    | 2.99E-10    | 102.7281295 | 32.16354152 | 296.5177971 | 344.106115  |
| GPR141      | 2.56221023  | 5.09E-15    | 6.07E-13    | 8.228374214 | 4.39468515  | 25.67229353 | 33.95754647 |
| ARNT2       | 2.555226806 | 0.003245596 | 0.017775025 | 0.235857598 | 1.143268422 | 3.848226402 | 2.481897459 |
| GPR161      | 2.546902918 | 1.13E-08    | 3.43E-07    | 2.743313791 | 2.81291485  | 12.74184913 | 13.04467156 |
| TNK2-AS1    | 2.542896653 | 0.000710143 | 0.005142036 | 1.489585695 | 0.528135528 | 4.857431818 | 4.537739399 |
| APOL6       | 2.542569922 | 7.51E-05    | 0.000788222 | 71.30656908 | 20.30026427 | 173.9624144 | 251.6641188 |
| RPS6KL1     | 2.539917972 | 0.000688445 | 0.005012585 | 0.314215604 | 0.352383272 | 1.640589555 | 1.418530939 |
| CMPK2       | 2.53670945  | 0.000100958 | 0.001002698 | 167.1384105 | 44.29044715 | 419.6408578 | 557.7718946 |
| ARHGAP23    | 2.534172704 | 1.75E-09    | 6.56E-08    | 2.194807749 | 1.670525189 | 7.821972728 | 10.06724531 |
| HERC5       | 2.525790081 | 0.00023405  | 0.002043305 | 122.395989  | 29.35150543 | 321.8740832 | 373.455031  |
| TNFSF13B    | 2.523952326 | 0.001348093 | 0.008680247 | 76.24312346 | 15.6428295  | 169.1056133 | 252.4439209 |
| CRHBP       | 2.523638457 | 1.77E-13    | 1.61E-11    | 13.00821258 | 6.679464471 | 42.89186094 | 47.35596463 |
| CD40        | 2.519859547 | 1.34E-16    | 2.17E-14    | 30.0902579  | 15.46707725 | 112.0224319 | 95.49102247 |



|           |             |             |             |             |             |             |             |
|-----------|-------------|-------------|-------------|-------------|-------------|-------------|-------------|
| METTL27   | 2.518987258 | 0.001704002 | 0.010450681 | 1.489585695 | 0.4402594   | 5.740486558 | 3.04902627  |
| SP140     | 2.518325381 | 1.05E-07    | 2.54E-06    | 24.21340745 | 5.097694172 | 63.39134595 | 70.39557258 |
| DYSF      | 2.517420962 | 6.79E-25    | 4.90E-22    | 33.38129415 | 24.95769905 | 131.2604102 | 134.339346  |
| NCOA7     | 2.515973268 | 1.90E-12    | 1.37E-10    | 24.05669143 | 9.667252815 | 68.50044837 | 85.35359497 |
| SIDT2     | 2.508954063 | 3.53E-19    | 1.06E-16    | 63.00062044 | 32.16354152 | 215.2136857 | 215.438766  |
| TMCC3     | 2.506257044 | 1.08E-06    | 2.06E-05    | 1.489585695 | 5.449198683 | 13.56182853 | 17.65259315 |
| ZBTB42    | 2.504177296 | 2.49E-10    | 1.14E-08    | 4.467189924 | 3.252295489 | 19.93243772 | 14.8169491  |
| P2RY11    | 2.501800698 | 4.32E-09    | 1.47E-07    | 16.22089083 | 4.658313533 | 54.81309992 | 39.06170577 |
| SLC22A16  | 2.495885666 | 1.12E-06    | 2.11E-05    | 5.564202009 | 1.758401317 | 14.0033559  | 19.07041518 |
| LOC728743 | 2.483760836 | 3.25E-08    | 8.65E-07    | 2.743313791 | 2.197781955 | 13.37260252 | 8.507641076 |
| JUP       | 2.475659434 | 0.006875868 | 0.032554348 | 110.9557201 | 14.41256371 | 268.3861961 | 285.9754119 |
| RTP4      | 2.474217012 | 0.001150632 | 0.007620363 | 37.06412044 | 7.558225749 | 102.8134325 | 94.07320044 |
| FGD2      | 2.470855008 | 1.29E-11    | 7.61E-10    | 98.73187119 | 31.19690412 | 279.2982297 | 293.4898686 |
| SRGAP2D   | 2.461443164 | 1.95E-08    | 5.48E-07    | 6.034350045 | 3.076543233 | 14.69718463 | 25.52150541 |
| KCNJ10    | 2.451951188 | 0.003062663 | 0.016985891 | 0.78436364  | 0.616011656 | 3.722075725 | 2.340115256 |
| PPM1K     | 2.446109695 | 9.82E-09    | 3.03E-07    | 19.90371711 | 5.888579322 | 47.2440593  | 65.00784887 |
| GMPR      | 2.444628408 | 0.000339809 | 0.002798962 | 119.7318168 | 28.64849641 | 324.460172  | 317.1674965 |
| C5orf56   | 2.443239972 | 5.21E-06    | 8.09E-05    | 5.329127991 | 2.197781955 | 17.40942418 | 15.17140461 |
| PKIB      | 2.440202849 | 1.19E-05    | 0.000162933 | 5.329127991 | 0.616011656 | 11.29111635 | 14.60427579 |
| MB21D1    | 2.437079868 | 1.38E-11    | 8.13E-10    | 9.168670287 | 4.658313533 | 27.31225233 | 32.46883334 |
| APOL1     | 2.429352132 | 0.000653596 | 0.004785411 | 115.7355585 | 25.57283194 | 288.6964551 | 316.6003677 |
| CD1D      | 2.427251063 | 0.005555788 | 0.027519572 | 1.567943701 | 0.352383272 | 4.35282911  | 3.899719487 |
| JADE2     | 2.421916694 | 1.40E-16    | 2.24E-14    | 37.53426847 | 18.63061785 | 121.2314314 | 118.1052838 |
| C9orf66   | 2.419370918 | 0.001152062 | 0.007622836 | 1.332869683 | 0.528135528 | 3.785151064 | 4.183283892 |
| 44075     | 2.418055405 | 0.000212854 | 0.00187871  | 0.862721647 | 2.0220297   | 7.632746713 | 4.466848298 |
| NFE2L3    | 2.417770858 | 1.06E-11    | 6.42E-10    | 12.38134853 | 7.11884511  | 40.30577206 | 42.67715194 |
| PODXL     | 2.416896679 | 0.001887737 | 0.011341354 | 0.549289622 | 0.4402594   | 2.145192263 | 2.056550851 |

|          |             |             |             |             |             |             |             |
|----------|-------------|-------------|-------------|-------------|-------------|-------------|-------------|
| MCC      | 2.411318201 | 0.002446325 | 0.014149466 | 0.39257361  | 0.528135528 | 1.009836169 | 2.907244068 |
| DENND1B  | 2.410639878 | 2.22E-18    | 5.61E-16    | 16.53432285 | 12.39141278 | 50.46090156 | 72.30963232 |
| F2RL3    | 2.40768168  | 1.06E-07    | 2.55E-06    | 7.52315216  | 2.637162594 | 18.73400629 | 24.38724779 |
| SIGLEC16 | 2.405440827 | 4.70E-22    | 2.61E-19    | 22.2544573  | 19.15787461 | 87.99072797 | 86.34607039 |
| RBMS2    | 2.403606326 | 6.85E-17    | 1.20E-14    | 19.43356908 | 10.72176635 | 61.18370911 | 65.92943319 |
| STOM     | 2.396864156 | 1.01E-22    | 6.05E-20    | 128.5079135 | 73.90470221 | 382.9940862 | 465.8261361 |
| FUT4     | 2.391344278 | 3.41E-20    | 1.26E-17    | 28.05294974 | 21.61840619 | 97.38895341 | 110.0236983 |
| HELZ2    | 2.375132158 | 1.64E-10    | 7.74E-09    | 135.9519241 | 45.78434133 | 338.5259725 | 412.1615723 |
| TUFT1    | 2.366555498 | 1.50E-07    | 3.48E-06    | 2.351523761 | 2.461410339 | 10.66036296 | 9.003878786 |
| PRUNE2   | 2.364724115 | 1.82E-06    | 3.19E-05    | 2.194807749 | 1.319020678 | 6.938917989 | 7.515165657 |
| CBWD1    | 2.35788363  | 3.28E-27    | 3.64E-24    | 29.30667784 | 21.9699107  | 109.6255691 | 99.17735974 |
| SMCHD1   | 2.356879445 | 3.53E-13    | 3.05E-11    | 43.0976869  | 22.32141521 | 108.2379116 | 159.2221226 |
| IL4I1    | 2.355639075 | 3.08E-18    | 7.53E-16    | 458.3167609 | 251.4144803 | 1660.648143 | 1216.492009 |
| SCIN     | 2.355180817 | 1.40E-10    | 6.70E-09    | 20.60893917 | 11.60052763 | 54.87617525 | 76.6339895  |
| SMAD3    | 2.351430871 | 2.57E-08    | 7.06E-07    | 9.403744305 | 4.39468515  | 26.17689623 | 29.98764479 |
| RBM43    | 2.327638158 | 3.47E-09    | 1.21E-07    | 6.112708051 | 4.043180638 | 16.7786708  | 23.96190118 |
| NAA25    | 2.320583995 | 1.95E-20    | 8.05E-18    | 17.94476696 | 13.0944218  | 57.58841481 | 65.92943319 |
| TRIM5    | 2.314607964 | 3.64E-11    | 1.94E-09    | 35.81039234 | 16.17008627 | 82.69239954 | 123.7765719 |
| MCOLN2   | 2.311585515 | 7.77E-05    | 0.000811222 | 8.620164244 | 1.846277444 | 20.43704043 | 20.98447492 |
| FLJ32255 | 2.301757107 | 7.10E-13    | 5.75E-11    | 14.02686666 | 7.294597366 | 40.81037477 | 42.96071635 |
| CD72     | 2.294920553 | 1.29E-08    | 3.84E-07    | 7.13136213  | 3.955304511 | 26.80764962 | 16.30566223 |
| C17orf97 | 2.293508102 | 0.003413713 | 0.018457586 | 0.00078358  | 1.23114455  | 2.208267601 | 2.481897459 |
| PI4K2B   | 2.2916883   | 3.84E-16    | 5.59E-14    | 22.72460533 | 17.48822819 | 70.77116056 | 86.06250598 |
| SAMD9L   | 2.268388893 | 0.001463894 | 0.009257428 | 193.1532685 | 44.29044715 | 369.4959637 | 542.7429811 |
| ADAMTSL4 | 2.267008094 | 1.87E-14    | 2.09E-12    | 30.32533192 | 15.11557274 | 92.40600167 | 81.38369329 |
| DUSP5    | 2.261640916 | 2.57E-18    | 6.39E-16    | 27.19101168 | 44.46619941 | 145.8938887 | 126.3995427 |
| SPATS2L  | 2.257492573 | 0.000334743 | 0.002761963 | 103.1199195 | 27.76973513 | 239.1823144 | 258.4696645 |

|         |             |             |             |             |             |             |             |
|---------|-------------|-------------|-------------|-------------|-------------|-------------|-------------|
| SP110   | 2.251552914 | 0.002459053 | 0.014211692 | 127.8026914 | 28.47274416 | 289.8948865 | 301.5714542 |
| PML     | 2.248101812 | 1.21E-11    | 7.19E-10    | 198.7166869 | 73.02594093 | 507.5048044 | 518.4982244 |
| NCF1    | 2.247051976 | 2.06E-19    | 6.33E-17    | 524.607634  | 335.5998107 | 1805.595271 | 1431.079372 |
| LILRA5  | 2.246263372 | 0.003035617 | 0.016881307 | 122.552705  | 25.30920356 | 298.7254339 | 257.8316446 |
| SLFN12  | 2.240159415 | 1.87E-07    | 4.23E-06    | 8.071658202 | 2.900790978 | 20.31088975 | 21.05536602 |
| CD38    | 2.235474559 | 4.00E-10    | 1.73E-08    | 72.63865518 | 26.18796484 | 190.109701  | 179.6387598 |
| C1GALT1 | 2.235219847 | 5.57E-13    | 4.64E-11    | 24.21340745 | 12.21566052 | 59.10222293 | 77.76824712 |
| OAS1    | 2.234976406 | 0.000347382 | 0.002854826 | 637.4431627 | 154.6628636 | 1436.604541 | 1527.420379 |
| MX1     | 2.230727309 | 0.000314945 | 0.00262412  | 1489.743194 | 389.3800009 | 3330.189278 | 3683.289663 |
| CTSC    | 2.227123838 | 5.57E-29    | 1.00E-25    | 493.2644316 | 346.7600789 | 1581.740894 | 1542.023946 |
| FAR2    | 2.225398619 | 3.31E-09    | 1.16E-07    | 5.564202009 | 10.45813797 | 24.22156074 | 35.3753685  |
| HEG1    | 2.222762522 | 8.37E-17    | 1.42E-14    | 13.08657059 | 13.88530695 | 46.80253193 | 53.31081715 |
| NUB1    | 2.22217487  | 6.87E-20    | 2.42E-17    | 84.00056606 | 49.47513869 | 242.7145333 | 252.514812  |
| PDGFRL  | 2.221226732 | 0.004300257 | 0.022427541 | 5.642560015 | 0.879640039 | 12.04802041 | 12.19397835 |
| CD47    | 2.220360367 | 1.01E-17    | 2.25E-15    | 163.5339422 | 86.73461686 | 459.8198485 | 467.1021759 |
| ANO5    | 2.208515723 | 1.23E-05    | 0.000166982 | 1.724659713 | 2.197781955 | 5.172808511 | 9.287443192 |
| GSDMD   | 2.208181937 | 0.00327036  | 0.017874183 | 122.474347  | 26.27584096 | 296.2024204 | 248.970257  |
| SSTR2   | 2.197253895 | 0.001460806 | 0.009241952 | 0.862721647 | 1.934153572 | 5.298959188 | 4.821303805 |
| PARP15  | 2.195182479 | 2.21E-08    | 6.14E-07    | 10.34404038 | 5.185570299 | 27.12302631 | 29.56229819 |
| ARL5B   | 2.194113526 | 0.000111889 | 0.001092721 | 3.291819834 | 1.143268422 | 7.31737002  | 8.932987685 |
| FAM122C | 2.188326954 | 0.000991323 | 0.006743593 | 3.135103822 | 0.879640039 | 5.614335881 | 9.074769887 |
| CD200R1 | 2.187994228 | 0.00169489  | 0.010403639 | 3.840325876 | 0.703887783 | 5.866637235 | 10.77615632 |
| BAK1    | 2.182942808 | 5.77E-22    | 2.98E-19    | 76.47819748 | 51.32053738 | 229.4687122 | 231.8146104 |
| NTNG2   | 2.180706166 | 6.23E-05    | 0.000670126 | 5.172411979 | 1.758401317 | 12.11109575 | 12.97378046 |
| FAM129A | 2.178294349 | 8.96E-12    | 5.55E-10    | 20.92237119 | 18.01548495 | 63.26519528 | 77.05933611 |
| ATXN7L1 | 2.175183718 | 4.06E-10    | 1.75E-08    | 12.61642255 | 6.767340599 | 30.33986858 | 39.55794348 |
| APOL3   | 2.174545038 | 0.001624764 | 0.010045181 | 104.2169316 | 24.60619454 | 239.6869171 | 222.0316384 |

|          |             |             |             |             |             |             |             |
|----------|-------------|-------------|-------------|-------------|-------------|-------------|-------------|
| TMEM268  | 2.157416188 | 5.93E-14    | 5.90E-12    | 57.358844   | 28.03336352 | 144.3170053 | 158.8676671 |
| FFAR2    | 2.155232532 | 8.25E-11    | 4.15E-09    | 53.75437572 | 25.1334513  | 146.6507928 | 132.4252863 |
| NCF1C    | 2.154889669 | 1.30E-21    | 6.07E-19    | 228.4927292 | 176.5440194 | 816.0693604 | 612.9251714 |
| PIWIL4   | 2.151702557 | 8.24E-06    | 0.000119437 | 8.228374214 | 3.164419361 | 19.11245832 | 21.26803932 |
| IRF7     | 2.149672933 | 7.44E-10    | 3.01E-08    | 307.7910313 | 113.2732074 | 809.9510525 | 671.7647856 |
| PLSCR1   | 2.146976988 | 6.97E-10    | 2.83E-08    | 135.32506   | 50.52965223 | 299.86079   | 355.3778001 |
| C4orf32  | 2.14414964  | 4.03E-06    | 6.44E-05    | 3.918683882 | 2.109905828 | 10.34498627 | 10.91793852 |
| SLC8A1   | 2.139488979 | 8.07E-09    | 2.58E-07    | 16.45596485 | 9.315748304 | 36.39510107 | 54.30329257 |
| EMBP1    | 2.134299119 | 0.007855337 | 0.036148075 | 0.862721647 | 0.528135528 | 2.523644294 | 2.340115256 |
| GCNT1    | 2.133680083 | 2.46E-26    | 2.53E-23    | 71.07149506 | 56.1537244  | 205.1216316 | 239.2581761 |
| DDO      | 2.129116087 | 5.07E-06    | 7.88E-05    | 6.661214093 | 2.109905828 | 14.63410929 | 16.02209782 |
| PNPT1    | 2.127554477 | 4.23E-09    | 1.45E-07    | 66.3700147  | 24.51831841 | 142.0462931 | 174.3219272 |
| MVB12B   | 2.117220598 | 5.60E-10    | 2.32E-08    | 27.89623373 | 11.33689924 | 66.86048957 | 68.62329505 |
| NMI      | 2.109510125 | 5.49E-10    | 2.28E-08    | 101.9445494 | 38.66637498 | 234.7039653 | 247.8359993 |
| CBWD2    | 2.109509895 | 1.21E-16    | 1.99E-14    | 41.29545276 | 24.43044228 | 111.9593566 | 113.6391444 |
| IL3RA    | 2.1083717   | 0.000394533 | 0.003161301 | 1.097795665 | 2.725038722 | 6.560465958 | 6.451799136 |
| AKAP7    | 2.105462701 | 3.64E-07    | 7.81E-06    | 6.112708051 | 3.779552255 | 16.27406809 | 17.65259315 |
| C21orf91 | 2.105044006 | 2.43E-06    | 4.15E-05    | 3.213461828 | 3.164419361 | 9.588082206 | 12.26486945 |
| EIF2AK2  | 2.103555447 | 3.96E-08    | 1.04E-06    | 88.85876243 | 29.61513382 | 166.4564491 | 239.6835227 |
| PKD2L1   | 2.103211884 | 2.85E-06    | 4.77E-05    | 7.209720136 | 2.988667105 | 18.98630764 | 15.88031562 |
| IFIT5    | 2.098638269 | 4.00E-07    | 8.49E-06    | 41.68724279 | 12.30353665 | 85.27848841 | 98.89379533 |
| OAS2     | 2.094536439 | 0.000804787 | 0.005662549 | 537.144915  | 144.9964896 | 1043.203654 | 1275.756969 |
| EPS8L1   | 2.091829375 | 1.13E-05    | 0.00015651  | 5.094053973 | 2.637162594 | 15.45408869 | 10.70526522 |
| ARAP2    | 2.091696107 | 8.05E-07    | 1.58E-05    | 5.955992039 | 4.921941916 | 13.87720522 | 23.18209906 |
| MIR155HG | 2.086397657 | 2.22E-05    | 0.000274446 | 2.273165755 | 1.406896806 | 4.605130464 | 7.940512265 |
| APOBEC3F | 2.086042966 | 2.46E-05    | 0.000299338 | 14.34029869 | 3.428047744 | 28.2583824  | 31.90170453 |
| PARP11   | 2.070467356 | 9.84E-09    | 3.04E-07    | 9.247028293 | 6.152207705 | 23.08620465 | 28.49893167 |

|          |             |             |             |             |             |             |             |
|----------|-------------|-------------|-------------|-------------|-------------|-------------|-------------|
| DHX58    | 2.060052105 | 9.32E-09    | 2.91E-07    | 141.7504165 | 46.39947422 | 312.4758577 | 310.9999707 |
| BLZF1    | 2.043574249 | 4.41E-07    | 9.18E-06    | 22.48953131 | 10.28238571 | 39.29656664 | 68.76507725 |
| EPDR1    | 2.043312298 | 3.82E-14    | 4.05E-12    | 10.6574724  | 6.855216727 | 28.32145774 | 29.20784268 |
| GBP2     | 2.0371528   | 2.24E-15    | 2.91E-13    | 84.94086213 | 47.19035937 | 210.1045833 | 221.1809452 |
| SCIMP    | 2.035712029 | 2.00E-12    | 1.41E-10    | 55.32153584 | 28.38486803 | 136.6848893 | 136.1825147 |
| SLC44A2  | 2.035527159 | 1.54E-12    | 1.15E-10    | 12.30299053 | 21.0032733  | 58.66069556 | 49.41180657 |
| SSB      | 2.030454801 | 5.70E-11    | 2.93E-09    | 179.7540494 | 83.57107627 | 388.4185653 | 467.9528691 |
| AMER1    | 2.0277689   | 0.001469199 | 0.009274723 | 1.176153671 | 2.285658083 | 3.595925048 | 7.65694786  |
| CBR1     | 2.027635312 | 3.63E-09    | 1.26E-07    | 308.5746114 | 112.3944462 | 727.7008111 | 634.1925018 |
| TMEM110  | 2.027275673 | 4.37E-17    | 8.08E-15    | 52.1872156  | 33.48168344 | 138.0094714 | 139.6561786 |
| ZNRF2    | 2.026870184 | 2.78E-13    | 2.44E-11    | 34.47830624 | 32.0756654  | 89.88298813 | 126.3286516 |
| FAM46A   | 2.026510821 | 2.33E-13    | 2.08E-11    | 57.51556001 | 30.66964735 | 127.4128145 | 158.8676671 |
| HERC6    | 2.021382384 | 0.004969925 | 0.02517409  | 63.00062044 | 13.79743082 | 110.1301718 | 138.1674655 |
| SLC18B1  | 2.017166373 | 8.20E-14    | 8.00E-12    | 9.247028293 | 8.70061541  | 26.36612225 | 31.47635792 |
| RAB40B   | 2.012704412 | 0.000107861 | 0.001059597 | 1.646301707 | 1.846277444 | 5.172808511 | 6.026452528 |
| SULT1C2  | 2.009392788 | 0.004189909 | 0.021947216 | 0.00078358  | 0.616011656 | 0.820610154 | 1.064075432 |
| MARCKS   | 2.007903694 | 6.74E-13    | 5.52E-11    | 782.7972639 | 370.1351289 | 1669.983293 | 2020.751554 |
| GRAMD1B  | 2.007565996 | 2.96E-09    | 1.05E-07    | 7.209720136 | 6.240083833 | 18.79708163 | 24.31635668 |
| MGC16275 | 2.005560644 | 0.00366188  | 0.01959384  | 2.116449743 | 1.319020678 | 5.046657834 | 5.955561427 |
| C3orf38  | 2.002708253 | 9.57E-16    | 1.32E-13    | 26.87757965 | 18.27911334 | 65.78820882 | 78.40626704 |
| MX2      | 1.998863347 | 0.000742761 | 0.005329956 | 587.3723969 | 164.1534854 | 1116.686424 | 1272.56687  |
| FOLR2    | 1.996567715 | 9.21E-09    | 2.89E-07    | 43.25440291 | 17.57610431 | 95.05516588 | 98.04310212 |
| IFI35    | 1.994638977 | 0.001166566 | 0.007704674 | 491.9323455 | 133.7483452 | 1045.600517 | 932.9984942 |
| EPSTI1   | 1.994286245 | 1.48E-08    | 4.31E-07    | 298.1529966 | 98.15851347 | 609.3084007 | 645.9604247 |
| TAGAP    | 1.991724295 | 4.97E-13    | 4.20E-11    | 20.76565518 | 13.0944218  | 54.43464788 | 52.67279724 |
| MNDA     | 1.991645068 | 4.10E-10    | 1.76E-08    | 183.7503077 | 77.94700409 | 391.2569555 | 436.6190023 |
| HLA-C    | 1.990032126 | 4.26E-19    | 1.21E-16    | 2168.558601 | 1611.385434 | 6519.782996 | 5386.023027 |

|              |             |             |             |             |             |             |             |
|--------------|-------------|-------------|-------------|-------------|-------------|-------------|-------------|
| SERPINB9     | 1.989608338 | 2.20E-09    | 8.06E-08    | 30.16861591 | 13.88530695 | 59.41759963 | 80.17854457 |
| LOC101928101 | 1.987841975 | 0.003732808 | 0.019929022 | 0.627647628 | 1.143268422 | 2.775945648 | 2.765461865 |
| WARS         | 1.986188006 | 3.70E-29    | 7.62E-26    | 163.7690162 | 132.0786988 | 441.0864729 | 491.2051504 |
| ABHD17C      | 1.985738302 | 0.006217114 | 0.030208474 | 0.78436364  | 0.4402594   | 1.892890909 | 1.98565975  |
| C1R          | 1.984792843 | 0.000145044 | 0.001362711 | 2.429881767 | 2.461410339 | 7.443520697 | 7.940512265 |
| RNF138       | 1.984494962 | 8.71E-10    | 3.45E-08    | 16.84775488 | 10.72176635 | 40.74729943 | 46.15081591 |
| CHST12       | 1.97649293  | 7.37E-17    | 1.27E-14    | 24.52683947 | 19.94875976 | 74.61875621 | 64.29893786 |
| ALDH1A1      | 1.96791377  | 3.17E-12    | 2.12E-10    | 63.94091651 | 33.6574357  | 129.6835267 | 174.7472738 |
| PARP10       | 1.958872922 | 2.92E-08    | 7.85E-07    | 310.2201295 | 116.6125003 | 738.8020707 | 576.3453631 |
| CD2AP        | 1.954189101 | 2.40E-09    | 8.71E-08    | 23.50818539 | 15.02769661 | 51.02857961 | 68.05616623 |
| RIN1         | 1.952995386 | 2.24E-11    | 1.27E-09    | 36.67233041 | 21.70628232 | 98.27200815 | 81.10012889 |
| TMEM173      | 1.951277877 | 2.80E-17    | 5.46E-15    | 15.75074279 | 13.62167856 | 43.648765   | 46.71794472 |
| TRANK1       | 1.950073446 | 1.25E-08    | 3.75E-07    | 21.78430926 | 9.843005071 | 47.81173734 | 49.48269767 |
| PDCD1LG2     | 1.948817756 | 6.94E-05    | 0.000738172 | 12.85149657 | 2.900790978 | 23.46465668 | 25.0252677  |
| UBE2S        | 1.945321076 | 8.67E-13    | 6.91E-11    | 69.89612497 | 50.09027159 | 197.552591  | 169.0759857 |
| DAPP1        | 1.945216012 | 1.79E-09    | 6.66E-08    | 23.11639536 | 13.27017405 | 50.01937419 | 61.67596711 |
| DOPEY1       | 1.943511833 | 1.12E-05    | 0.000155684 | 5.172411979 | 4.746189661 | 13.30952718 | 17.08546434 |
| PRKCE        | 1.94347941  | 0.001073763 | 0.007190476 | 2.351523761 | 1.494772933 | 4.542055126 | 7.302492353 |
| ATP13A2      | 1.941420815 | 8.52E-13    | 6.83E-11    | 139.3996763 | 72.93806481 | 349.9426088 | 297.1053148 |
| HIST2H2BE    | 1.938759612 | 1.35E-06    | 2.47E-05    | 30.71712195 | 12.30353665 | 78.52942719 | 52.10566842 |
| ST3GAL5      | 1.935501513 | 2.72E-15    | 3.48E-13    | 69.42597693 | 42.35717234 | 171.1870995 | 168.6506391 |
| SLC6A12      | 1.935284652 | 0.000102125 | 0.001010817 | 5.094053973 | 2.637162594 | 12.80492447 | 10.70526522 |
| ADGRG6       | 1.934593034 | 0.000896463 | 0.006178062 | 0.941079653 | 0.791763911 | 2.712870309 | 2.552788561 |
| CBWD5        | 1.933019651 | 1.24E-12    | 9.41E-11    | 19.27685307 | 12.56716503 | 49.01016877 | 47.71042014 |
| RGS1         | 1.931720526 | 4.49E-16    | 6.41E-14    | 76.71327149 | 105.0128514 | 318.4049395 | 230.3967884 |
| RASGEF1B     | 1.930905882 | 1.54E-19    | 4.85E-17    | 37.8477005  | 47.2782355  | 121.7991094 | 136.1825147 |
| PAPD7        | 1.927313182 | 1.04E-19    | 3.40E-17    | 36.67233041 | 29.26362931 | 97.7043301  | 101.7294394 |

|           |             |             |             |             |             |             |             |
|-----------|-------------|-------------|-------------|-------------|-------------|-------------|-------------|
| ADIRF     | 1.924869053 | 1.03E-05    | 0.000145047 | 12.38134853 | 6.415836088 | 31.28599865 | 25.3797232  |
| SENCR     | 1.918775693 | 6.62E-05    | 0.000708994 | 4.780621949 | 1.934153572 | 9.651157545 | 10.63437412 |
| RICTOR    | 1.916549264 | 7.26E-09    | 2.35E-07    | 14.10522467 | 8.70061541  | 29.64603985 | 39.06170577 |
| UBE2L6    | 1.914611324 | 0.001094047 | 0.007310323 | 456.2010947 | 125.1364847 | 885.5153081 | 855.0182826 |
| FAM89A    | 1.908442657 | 0.000289653 | 0.002448729 | 1.019437659 | 2.549286466 | 5.172808511 | 5.388432616 |
| OSBPL1A   | 1.905085523 | 1.04E-12    | 8.05E-11    | 36.82904642 | 26.27584096 | 78.08789983 | 110.4490449 |
| FBXO6     | 1.90207675  | 2.64E-07    | 5.79E-06    | 59.70958418 | 20.73964491 | 122.9344655 | 115.9785508 |
| TFAP2C    | 1.902026792 | 0.001622614 | 0.010041139 | 0.627647628 | 1.143268422 | 2.523644294 | 2.694570763 |
| ATF5      | 1.900995141 | 4.81E-17    | 8.78E-15    | 444.6041099 | 277.4258141 | 1085.401056 | 1056.349011 |
| NAP1L5    | 1.900001352 | 0.009169195 | 0.040907196 | 0.78436364  | 0.791763911 | 1.451363539 | 3.261699574 |
| NCF1B     | 1.899293801 | 2.20E-10    | 1.03E-08    | 215.6420162 | 117.5791377 | 584.3305667 | 399.6138474 |
| STAMBPL1  | 1.897243979 | 3.41E-05    | 0.000394685 | 1.097795665 | 1.846277444 | 3.785151064 | 4.892194906 |
| SLC15A4   | 1.891802737 | 3.07E-25    | 2.59E-22    | 42.39246485 | 45.25708456 | 121.6729587 | 136.9623168 |
| PAQR8     | 1.890859838 | 9.96E-06    | 0.000141327 | 28.36638177 | 7.90973026  | 53.99312052 | 53.02725274 |
| NRIP1     | 1.889143275 | 2.09E-11    | 1.20E-09    | 27.03429566 | 20.12451202 | 58.91299692 | 80.39121787 |
| GIMAP4    | 1.887204442 | 6.20E-08    | 1.56E-06    | 91.75800865 | 32.60292216 | 175.5392978 | 190.4142072 |
| LGALS3BP  | 1.88630169  | 1.60E-09    | 6.02E-08    | 570.9172156 | 228.2151826 | 1215.083952 | 1130.288429 |
| ENPP4     | 1.886144326 | 1.11E-07    | 2.66E-06    | 17.70969295 | 9.227872177 | 33.61978618 | 45.8672515  |
| NCOA2     | 1.882918312 | 4.26E-09    | 1.46E-07    | 17.47461893 | 14.0610592  | 37.65660784 | 55.15398578 |
| RPH3AL    | 1.882121321 | 0.006670596 | 0.031801577 | 1.489585695 | 1.055392294 | 2.965171663 | 4.537739399 |
| SASH1     | 1.880897399 | 2.06E-11    | 1.19E-09    | 20.68729717 | 29.35150543 | 60.93140775 | 85.84983268 |
| STAT1     | 1.880810363 | 1.28E-07    | 3.01E-06    | 787.5771023 | 260.9929782 | 1366.65399  | 1707.909123 |
| GRK5      | 1.878538819 | 0.00085622  | 0.005940437 | 1.489585695 | 1.582649061 | 4.226678433 | 4.750412703 |
| NUDT7     | 1.875507013 | 0.000113798 | 0.001107681 | 1.489585695 | 1.23114455  | 3.974377079 | 3.970610588 |
| LINC01504 | 1.870485142 | 4.70E-05    | 0.000523726 | 5.407485997 | 2.81291485  | 13.05722582 | 10.84704742 |
| ID1       | 1.866472677 | 0.002055212 | 0.012170193 | 4.232115906 | 4.921941916 | 21.13086915 | 5.033977109 |
| ZNFX1     | 1.865096952 | 1.91E-12    | 1.37E-10    | 201.3808591 | 108.3521443 | 396.1137566 | 502.5477266 |

|              |             |             |             |             |             |             |             |
|--------------|-------------|-------------|-------------|-------------|-------------|-------------|-------------|
| PPA1         | 1.862988398 | 9.26E-13    | 7.30E-11    | 21.39251923 | 13.62167856 | 50.5239769  | 50.8296286  |
| ACSM5        | 1.858694509 | 0.008478972 | 0.038490104 | 3.448535846 | 1.055392294 | 6.371239943 | 6.664472441 |
| PDE4B        | 1.84418274  | 6.55E-05    | 0.000702375 | 6.7395721   | 2.461410339 | 11.60649304 | 14.8169491  |
| CASP1        | 1.836630257 | 9.67E-12    | 5.96E-10    | 122.787779  | 63.00806237 | 263.340169  | 264.0700615 |
| EIF4E3       | 1.833211451 | 2.56E-14    | 2.84E-12    | 27.11265367 | 22.76079585 | 63.76979798 | 77.76824712 |
| PSMA4        | 1.831203297 | 1.40E-12    | 1.05E-10    | 174.8174951 | 93.67683096 | 378.2634358 | 380.9694877 |
| AIDA         | 1.828305349 | 1.72E-13    | 1.57E-11    | 23.97833343 | 23.81530939 | 56.38998338 | 78.90250475 |
| NAMPT        | 1.828103222 | 2.79E-13    | 2.44E-11    | 144.1011567 | 91.12842325 | 301.3115228 | 363.6011679 |
| MYO10        | 1.827358038 | 4.33E-08    | 1.13E-06    | 6.504498081 | 10.19450958 | 24.78923879 | 22.11873254 |
| C17orf67     | 1.826798408 | 0.005499888 | 0.027312074 | 3.448535846 | 1.319020678 | 6.749691974 | 6.735363542 |
| ZNF684       | 1.821753665 | 0.006285168 | 0.030457105 | 2.664955785 | 0.879640039 | 3.280548356 | 6.806254643 |
| LOC101927181 | 1.821641262 | 0.003138443 | 0.017352825 | 1.332869683 | 1.582649061 | 3.722075725 | 4.466848298 |
| PLEKHN1      | 1.821181709 | 0.001971771 | 0.011743553 | 1.411227689 | 3.955304511 | 8.831178144 | 6.09734363  |
| SNX10        | 1.81861437  | 3.29E-12    | 2.18E-10    | 44.74320503 | 36.2058434  | 95.37054258 | 132.2835041 |
| RAB38        | 1.81615109  | 1.62E-07    | 3.71E-06    | 3.683609864 | 1.494772933 | 7.001993328 | 7.65694786  |
| C2           | 1.815946793 | 2.00E-12    | 1.41E-10    | 77.96699959 | 44.81770392 | 173.0162843 | 170.5646988 |
| ARHGEF19     | 1.814115736 | 0.001325056 | 0.008570994 | 3.76196787  | 1.934153572 | 8.831178144 | 7.089819049 |
| LY86         | 1.80727362  | 9.06E-09    | 2.85E-07    | 84.5490721  | 37.69973757 | 174.0254897 | 165.8858861 |
| PANX1        | 1.806594197 | 6.16E-13    | 5.08E-11    | 18.88506304 | 14.6761921  | 43.58568966 | 49.90804428 |
| MT2A         | 1.804769994 | 1.34E-10    | 6.48E-09    | 129.5265676 | 118.5457751 | 394.5999485 | 291.8593733 |
| MFN1         | 1.804707551 | 1.98E-10    | 9.28E-09    | 10.42239838 | 9.667252815 | 24.78923879 | 31.12190242 |
| GTPBP1       | 1.802786887 | 4.08E-14    | 4.26E-12    | 75.61625941 | 47.2782355  | 159.7704632 | 181.4819284 |
| CASP7        | 1.799994459 | 7.12E-11    | 3.63E-09    | 44.27305699 | 30.14239058 | 87.10767323 | 119.5231058 |
| GPR155       | 1.799347622 | 2.92E-07    | 6.34E-06    | 18.33655699 | 8.349110899 | 36.45817641 | 37.50210154 |
| PSMB9        | 1.797257953 | 0.004598377 | 0.02360487  | 144.8847367 | 41.47841107 | 285.4165375 | 228.057382  |
| TMEM62       | 1.797005722 | 1.21E-08    | 3.67E-07    | 32.12756606 | 16.2579624  | 70.89731124 | 62.66844253 |
| HS3ST3B1     | 1.794996676 | 0.008938135 | 0.040119627 | 0.314215604 | 1.934153572 | 3.406699033 | 2.694570763 |



|          |             |             |             |             |             |             |             |
|----------|-------------|-------------|-------------|-------------|-------------|-------------|-------------|
| LNPEP    | 1.793550554 | 7.33E-06    | 0.000108271 | 7.444794154 | 4.921941916 | 12.55262312 | 21.76427703 |
| KIAA1522 | 1.788908922 | 9.68E-14    | 9.25E-12    | 17.39626092 | 13.44592631 | 42.57648425 | 42.18091423 |
| CD80     | 1.78879345  | 0.000160233 | 0.001484159 | 18.25819899 | 4.658313533 | 31.28599865 | 31.75992233 |
| IRF1     | 1.788641016 | 9.57E-15    | 1.10E-12    | 74.83267935 | 49.73876708 | 158.7612578 | 183.8213348 |
| MFSD14A  | 1.7867743   | 1.23E-12    | 9.41E-11    | 23.6649014  | 28.73637254 | 65.47283212 | 78.33537593 |
| CPEB3    | 1.784876113 | 0.000224163 | 0.001966227 | 3.683609864 | 2.900790978 | 6.938917989 | 11.20150293 |
| MOV10    | 1.779391176 | 1.16E-08    | 3.52E-07    | 118.2430147 | 49.91451933 | 235.8393214 | 222.6696583 |
| HEXDC    | 1.778037642 | 4.40E-10    | 1.87E-08    | 29.77682588 | 24.69407066 | 88.24302932 | 59.62012517 |
| FPR1     | 1.777297018 | 1.86E-05    | 0.000236522 | 14.18358267 | 4.921941916 | 23.96925939 | 28.28625836 |
| IFI6     | 1.777296766 | 0.004914406 | 0.024927871 | 3359.443577 | 997.7464334 | 6652.178131 | 5183.558042 |
| RFK      | 1.777214103 | 1.14E-09    | 4.44E-08    | 14.02686666 | 12.21566052 | 32.29520407 | 39.34527018 |
| C19orf38 | 1.765487821 | 1.60E-06    | 2.87E-05    | 27.11265367 | 11.95203214 | 54.87617525 | 50.6878464  |
| PPP2R2A  | 1.763291486 | 3.51E-14    | 3.81E-12    | 46.07529113 | 31.02115186 | 95.30746724 | 113.1429067 |
| BLVRA    | 1.762105785 | 4.95E-11    | 2.58E-09    | 165.7279664 | 89.98603359 | 352.6548483 | 336.2372027 |
| ELF1     | 1.755177821 | 7.55E-10    | 3.04E-08    | 37.8477005  | 38.31487047 | 88.99993339 | 115.7658775 |
| SMYD2    | 1.754978068 | 3.09E-10    | 1.39E-08    | 13.79179264 | 10.45813797 | 30.59216993 | 34.59556638 |
| GPR180   | 1.753584823 | 1.01E-07    | 2.45E-06    | 12.30299053 | 8.612739282 | 22.39237592 | 33.95754647 |
| KAT2B    | 1.751343068 | 6.79E-10    | 2.77E-08    | 18.72834702 | 13.35805018 | 35.9535737  | 50.26249979 |
| C18orf32 | 1.748354213 | 4.91E-10    | 2.06E-08    | 26.40743162 | 13.62167856 | 51.47010698 | 55.65022349 |
| CYP2U1   | 1.748086346 | 0.000636151 | 0.004688608 | 5.250769985 | 2.0220297   | 9.84038356  | 9.641898698 |
| AAED1    | 1.74758186  | 9.61E-11    | 4.78E-09    | 14.4970147  | 10.98539473 | 29.96141654 | 38.28190366 |
| GGACT    | 1.745978726 | 6.07E-08    | 1.53E-06    | 6.661214093 | 4.306809022 | 15.45408869 | 13.82447368 |
| TRAFD1   | 1.738154598 | 2.90E-20    | 1.10E-17    | 120.7504709 | 99.47665539 | 287.939551  | 295.9710572 |
| MASTL    | 1.738038793 | 4.31E-07    | 9.01E-06    | 28.20966575 | 15.11557274 | 50.83935359 | 64.36982896 |
| SYTL3    | 1.737398714 | 0.000279565 | 0.002378776 | 4.702263942 | 2.109905828 | 9.588082206 | 8.507641076 |
| LMNB1    | 1.737342418 | 3.57E-11    | 1.91E-09    | 21.86266727 | 26.62734547 | 57.46226413 | 71.17537469 |
| RNASET2  | 1.737261095 | 7.94E-09    | 2.55E-07    | 297.7612065 | 144.9964896 | 644.2521383 | 526.2253544 |

|          |             |             |             |             |             |             |             |
|----------|-------------|-------------|-------------|-------------|-------------|-------------|-------------|
| TRIM38   | 1.735049016 | 1.57E-07    | 3.61E-06    | 95.04904491 | 36.99672855 | 170.6194214 | 178.9298488 |
| TFEC     | 1.734987807 | 1.18E-11    | 7.05E-10    | 105.9408077 | 65.38071782 | 204.4278029 | 249.679168  |
| GIMAP5   | 1.733190573 | 3.64E-06    | 5.87E-05    | 87.84010835 | 27.59398288 | 157.9412784 | 146.887071  |
| TMEM140  | 1.73245172  | 9.56E-15    | 1.10E-12    | 87.84010835 | 61.60204432 | 198.3725704 | 196.2272775 |
| TMPPE    | 1.731384465 | 0.004317632 | 0.022501897 | 2.351523761 | 0.879640039 | 3.848226402 | 4.750412703 |
| RUBCN    | 1.730664518 | 1.59E-12    | 1.18E-10    | 96.45948902 | 57.20823794 | 190.7404544 | 215.0843105 |
| IGSF8    | 1.729081334 | 2.78E-10    | 1.26E-08    | 36.04546636 | 24.69407066 | 86.16154315 | 73.65656324 |
| SELENOO  | 1.728014155 | 4.79E-10    | 2.01E-08    | 102.6497715 | 61.86567271 | 236.4700748 | 195.8019309 |
| TMPRSS13 | 1.72776991  | 0.000624192 | 0.004616976 | 3.056745816 | 2.373534211 | 6.875842651 | 7.444274556 |
| ATP8A1   | 1.726383007 | 2.78E-05    | 0.000331605 | 3.056745816 | 4.131056766 | 8.200424759 | 10.70526522 |
| OSBPL5   | 1.72086854  | 3.37E-10    | 1.49E-08    | 21.86266727 | 17.8397327  | 53.55159315 | 50.40428199 |
| TAP2     | 1.715777756 | 9.21E-06    | 0.000131704 | 222.2240887 | 61.77779658 | 373.3435594 | 367.7837429 |
| VCPIP1   | 1.714709205 | 9.99E-08    | 2.42E-06    | 19.19849506 | 15.6428295  | 38.91811461 | 52.24745063 |
| TTC9     | 1.713794956 | 0.000325094 | 0.002696224 | 12.30299053 | 3.779552255 | 21.50932118 | 20.48823721 |
| GPRIN1   | 1.713480819 | 0.001062913 | 0.007137689 | 2.429881767 | 2.285658083 | 6.118938589 | 6.168234731 |
| RBCK1    | 1.711955104 | 1.47E-11    | 8.64E-10    | 161.65335   | 96.04948641 | 343.7612256 | 326.7377952 |
| KCNMB1   | 1.711278685 | 1.20E-05    | 0.000163789 | 8.855238263 | 4.218932894 | 17.91402689 | 16.16388003 |
| PSME2    | 1.710472799 | 1.96E-06    | 3.43E-05    | 343.5222821 | 116.5246242 | 639.6476386 | 554.8653594 |
| C19orf66 | 1.71014102  | 1.21E-09    | 4.66E-08    | 127.4892594 | 65.20496556 | 258.5464433 | 242.1647112 |
| LYN      | 1.709557534 | 1.74E-17    | 3.59E-15    | 368.440128  | 266.8806788 | 736.1529065 | 918.2531451 |
| EXOSC9   | 1.702166995 | 1.02E-12    | 7.93E-11    | 19.51192708 | 15.81858176 | 42.8287856  | 48.70289556 |
| PAPD5    | 1.700886071 | 2.07E-06    | 3.59E-05    | 5.799276027 | 5.624950938 | 12.04802041 | 17.58170205 |
| OAS3     | 1.699639301 | 0.00861109  | 0.03893065  | 654.44685   | 170.2169382 | 896.679643  | 1237.972012 |
| CD86     | 1.697930361 | 1.69E-17    | 3.54E-15    | 134.854912  | 96.22523866 | 296.7700984 | 299.0193745 |
| GIMAP6   | 1.6889617   | 3.22E-06    | 5.29E-05    | 51.48199355 | 19.50937913 | 75.37566027 | 107.2589453 |
| OLFML3   | 1.68631583  | 4.56E-06    | 7.15E-05    | 3.840325876 | 6.064331577 | 9.777308222 | 15.59675121 |
| SIGLEC11 | 1.684348837 | 4.25E-06    | 6.71E-05    | 23.5865434  | 10.10663345 | 39.86424469 | 46.43438031 |

|           |             |             |             |             |             |             |             |
|-----------|-------------|-------------|-------------|-------------|-------------|-------------|-------------|
| STX11     | 1.682307601 | 3.58E-14    | 3.86E-12    | 54.92974581 | 41.9177917  | 123.8805956 | 123.138552  |
| CNP       | 1.680338701 | 1.40E-09    | 5.30E-08    | 282.8731854 | 140.3390548 | 537.0871381 | 540.6871391 |
| LINC00623 | 1.680066927 | 6.77E-06    | 0.000101281 | 4.075399894 | 5.888579322 | 13.62490387 | 11.62684954 |
| FAM8A1    | 1.678335789 | 5.26E-08    | 1.34E-06    | 14.4970147  | 10.37026184 | 27.87993037 | 35.5880418  |
| PCGF5     | 1.673056311 | 1.03E-13    | 9.70E-12    | 45.6835011  | 37.43610919 | 89.31531008 | 122.0042944 |
| DYNLT1    | 1.670414207 | 5.94E-07    | 1.21E-05    | 224.1830389 | 91.47992776 | 414.2163787 | 383.5215674 |
| PHLDA2    | 1.666748572 | 8.80E-07    | 1.70E-05    | 6.504498081 | 6.415836088 | 18.04017757 | 14.46249359 |
| BCL2      | 1.663674523 | 2.22E-05    | 0.000274544 | 3.213461828 | 4.570437405 | 8.263500098 | 11.34328513 |
| CLIC4     | 1.662784016 | 3.39E-10    | 1.50E-08    | 39.80665065 | 34.44832084 | 80.10631066 | 107.2589453 |
| CPED1     | 1.659877666 | 0.000160336 | 0.001484159 | 5.329127991 | 3.691676127 | 8.831178144 | 13.96625588 |
| WDFY1     | 1.657877361 | 4.80E-14    | 4.88E-12    | 39.80665065 | 36.64522404 | 86.91844722 | 105.1322123 |
| BAG1      | 1.655297869 | 8.68E-11    | 4.35E-09    | 95.98934098 | 57.91124696 | 204.3647275 | 180.4185619 |
| ABRAXAS1  | 1.653496705 | 0.001833734 | 0.011090784 | 5.642560015 | 2.109905828 | 8.57887679  | 10.91793852 |
| IFI44     | 1.652248713 | 0.007013716 | 0.033109238 | 277.779915  | 72.49868417 | 434.0851104 | 440.7306862 |
| LRRC4     | 1.651038724 | 3.62E-06    | 5.86E-05    | 7.209720136 | 5.53707481  | 15.01256132 | 16.87279104 |
| SCLT1     | 1.650984221 | 3.08E-05    | 0.000361895 | 10.03060835 | 5.361322555 | 16.14791741 | 22.47318805 |
| TRIM21    | 1.65059932  | 1.35E-08    | 3.99E-07    | 121.5340509 | 56.59310504 | 221.3319936 | 223.165896  |
| DTX3L     | 1.647728815 | 1.94E-08    | 5.48E-07    | 130.3101476 | 67.2261165  | 211.8076175 | 281.4383814 |
| RNF19B    | 1.646376721 | 2.96E-17    | 5.70E-15    | 134.4631219 | 105.1007276 | 295.950119  | 300.0118499 |
| BBX       | 1.645431039 | 6.87E-07    | 1.37E-05    | 12.22463252 | 11.24902312 | 26.49227293 | 31.97259563 |
| SEMA4D    | 1.644085341 | 2.32E-13    | 2.08E-11    | 32.91114612 | 24.69407066 | 66.86048957 | 76.4922073  |
| APOL2     | 1.643097863 | 2.57E-09    | 9.32E-08    | 114.9519784 | 58.70213211 | 215.3398364 | 215.7223304 |
| NAPA      | 1.642982842 | 5.57E-11    | 2.87E-09    | 422.4287941 | 236.9149192 | 821.3046135 | 814.5394637 |
| DCK       | 1.642186926 | 3.12E-07    | 6.77E-06    | 18.49327301 | 13.53380244 | 32.23212873 | 47.56863794 |
| PSD3      | 1.642171377 | 5.49E-06    | 8.43E-05    | 6.191066057 | 6.503712216 | 15.45408869 | 16.02209782 |
| CSRNP1    | 1.639179333 | 1.14E-15    | 1.55E-13    | 45.6051431  | 44.55407554 | 115.1131235 | 107.8260741 |
| CHRNA1    | 1.638660117 | 2.00E-06    | 3.50E-05    | 8.228374214 | 5.624950938 | 15.07563666 | 19.35397959 |

|              |             |             |             |             |             |             |             |
|--------------|-------------|-------------|-------------|-------------|-------------|-------------|-------------|
| FPR3         | 1.636571273 | 2.97E-12    | 1.99E-10    | 1155.076151 | 683.7650289 | 2047.299968 | 2503.661736 |
| NBN          | 1.633946473 | 2.15E-08    | 5.99E-07    | 28.20966575 | 20.47601653 | 48.50556607 | 72.09695901 |
| SAV1         | 1.632130689 | 3.65E-07    | 7.81E-06    | 6.896288112 | 8.612739282 | 17.03097215 | 21.19714822 |
| CPEB2        | 1.629449709 | 2.74E-06    | 4.62E-05    | 14.41865669 | 10.8975186  | 26.05074556 | 36.43873502 |
| ADA2         | 1.62841431  | 5.06E-10    | 2.11E-08    | 325.5782987 | 170.744195  | 549.9545072 | 671.6230034 |
| PHACTR2      | 1.627283462 | 6.33E-07    | 1.28E-05    | 15.20223675 | 18.19123721 | 37.53045717 | 44.52032058 |
| HLA-H        | 1.62705962  | 5.72E-10    | 2.36E-08    | 345.2461582 | 212.2217273 | 774.1242602 | 590.240019  |
| FMR1         | 1.626791924 | 3.27E-06    | 5.35E-05    | 26.01564159 | 13.00654567 | 39.35964198 | 56.85537222 |
| SDC3         | 1.626308241 | 2.60E-11    | 1.45E-09    | 97.24306908 | 60.72328305 | 207.5815698 | 179.4260865 |
| THRB         | 1.621848744 | 0.00289672  | 0.016208825 | 1.411227689 | 1.055392294 | 3.469774371 | 2.552788561 |
| ZNF296       | 1.620820324 | 3.60E-05    | 0.000414854 | 7.679868172 | 5.712827066 | 17.53557486 | 15.17140461 |
| DLAT         | 1.613640209 | 4.07E-11    | 2.14E-09    | 23.27311137 | 17.57610431 | 46.1087032  | 53.45259935 |
| BCL2L13      | 1.612233396 | 5.11E-17    | 9.10E-15    | 66.3700147  | 53.6053167  | 139.1448275 | 152.6292502 |
| EVL          | 1.611421007 | 1.34E-07    | 3.13E-06    | 62.13868237 | 27.94548739 | 110.0670964 | 108.7476584 |
| TDRD7        | 1.610727752 | 2.82E-10    | 1.28E-08    | 58.22078207 | 36.99672855 | 113.2208634 | 118.0343927 |
| ZC3HAV1      | 1.610384965 | 1.40E-13    | 1.29E-11    | 68.01553282 | 53.42956444 | 144.5693066 | 150.2189527 |
| DDX60L       | 1.608667692 | 3.08E-05    | 0.000361531 | 164.2391642 | 51.58416576 | 240.4438211 | 283.4233322 |
| ICAM2        | 1.605505341 | 0.000164657 | 0.00151929  | 16.14253282 | 6.064331577 | 32.29520407 | 21.26803932 |
| FAM72A       | 1.605342497 | 3.56E-05    | 0.000410168 | 6.034350045 | 4.39468515  | 12.42647244 | 12.83199826 |
| LAP3         | 1.604780526 | 2.83E-07    | 6.17E-06    | 509.8763289 | 204.7522565 | 809.5095252 | 919.4582938 |
| NLRC5        | 1.604389772 | 2.94E-08    | 7.89E-07    | 52.42228962 | 27.15460224 | 91.9644743  | 100.5951818 |
| LRRCC1       | 1.600182905 | 0.007092751 | 0.033400875 | 2.664955785 | 1.758401317 | 3.595925048 | 7.16071015  |
| BISPR        | 1.599333838 | 1.22E-07    | 2.89E-06    | 20.06043313 | 11.68840375 | 34.18746422 | 42.53536974 |
| PAPD4        | 1.599313453 | 1.74E-08    | 4.94E-07    | 105.0788697 | 60.37177854 | 179.7653455 | 219.4086677 |
| CDK18        | 1.598089492 | 8.49E-09    | 2.69E-07    | 17.63133494 | 9.930881199 | 34.75514227 | 31.61814013 |
| LOC101927021 | 1.597661431 | 0.009116289 | 0.040729775 | 1.176153671 | 1.494772933 | 3.280548356 | 3.119917372 |
| PTMS         | 1.593774014 | 3.65E-08    | 9.61E-07    | 146.6869709 | 77.85912796 | 291.660996  | 245.9928307 |

|              |              |             |             |             |             |             |             |
|--------------|--------------|-------------|-------------|-------------|-------------|-------------|-------------|
| RNF144B      | 1.593042141  | 1.30E-09    | 4.95E-08    | 15.43731077 | 13.62167856 | 33.30440949 | 36.43873502 |
| ASPHD2       | 1.585439189  | 0.002872919 | 0.016094366 | 5.094053973 | 4.39468515  | 12.23724642 | 10.35080971 |
| TSNAX-DISC1  | 1.585372331  | 1.78E-05    | 0.000228986 | 11.20597844 | 6.415836088 | 17.91402689 | 24.31635668 |
| ITM2B        | 1.585176639  | 2.81E-16    | 4.19E-14    | 550.622492  | 406.4279697 | 1076.507433 | 1207.347056 |
| UBE2F        | 1.585119481  | 1.01E-12    | 7.85E-11    | 107.5079679 | 71.35629451 | 212.6275969 | 213.8791618 |
| ARHGAP17     | 1.583850907  | 3.88E-15    | 4.75E-13    | 83.76549204 | 74.16833059 | 184.9375233 | 191.3357915 |
| NAGK         | 1.582636673  | 5.43E-07    | 1.11E-05    | 481.7458047 | 208.6188061 | 868.4218913 | 772.4301495 |
| TGIF2        | 1.582574397  | 3.13E-09    | 1.10E-07    | 12.69478056 | 11.24902312 | 29.58296451 | 27.36467404 |
| SPTLC2       | 1.582084744  | 4.43E-14    | 4.57E-12    | 84.15728207 | 61.77779658 | 174.7823938 | 172.4078675 |
| SENP7        | 1.580117026  | 0.001572115 | 0.009778961 | 3.291819834 | 3.867428383 | 7.191219343 | 9.854572003 |
| OGFR         | 1.579131627  | 2.21E-12    | 1.52E-10    | 251.843415  | 189.286058  | 573.5446838 | 471.5683153 |
| RTCB         | 1.575379621  | 2.88E-08    | 7.77E-07    | 333.2573833 | 158.7930416 | 586.3489775 | 578.5429873 |
| QSER1        | 1.5711105418 | 1.72E-08    | 4.88E-07    | 13.63507663 | 11.86415601 | 26.42919759 | 33.95754647 |
| TBC1D4       | 1.56908501   | 5.58E-05    | 0.00060712  | 5.720918021 | 3.428047744 | 8.011198744 | 13.75358258 |
| CD209        | 1.568933155  | 1.78E-12    | 1.30E-10    | 38.39620654 | 27.3303545  | 70.8342359  | 84.50290175 |
| ARHGAP15     | 1.562333039  | 1.85E-09    | 6.85E-08    | 18.49327301 | 14.93982048 | 40.24269672 | 38.21101255 |
| LMO2         | 1.560260791  | 7.18E-17    | 1.25E-14    | 97.79157512 | 86.29523623 | 220.6381649 | 210.4763889 |
| CRYZ         | 1.556081121  | 2.38E-06    | 4.08E-05    | 7.836584184 | 7.646101877 | 13.75105455 | 22.61497025 |
| OPTN         | 1.554121403  | 1.57E-06    | 2.81E-05    | 100.4557473 | 46.92673099 | 172.4486062 | 171.4862831 |
| DBF4B        | 1.550661725  | 0.00037483  | 0.003035449 | 4.1537579   | 10.10663345 | 14.25565726 | 18.92863298 |
| MLKL         | 1.549108593  | 4.14E-07    | 8.75E-06    | 50.69841349 | 23.20017649 | 82.56624886 | 89.53616995 |
| RAB8B        | 1.548274411  | 1.27E-08    | 3.79E-07    | 62.92226243 | 44.81770392 | 107.1025555 | 144.0514269 |
| B3GNT2       | 1.547791776  | 6.59E-10    | 2.70E-08    | 51.09020352 | 66.78673586 | 112.3378086 | 162.3413311 |
| CBS          | 1.544637697  | 0.003325575 | 0.018075847 | 1.881375725 | 4.043180638 | 7.065068666 | 6.593581339 |
| EHD4         | 1.543977723  | 1.00E-13    | 9.54E-12    | 146.5302549 | 100.7069212 | 280.6858871 | 292.4265021 |
| LOC101927027 | 1.543287405  | 0.000548126 | 0.004156599 | 12.22463252 | 5.888579322 | 18.98630764 | 23.11120796 |
| NLK          | 1.540840862  | 4.15E-07    | 8.75E-06    | 11.04926243 | 10.19450958 | 21.19394449 | 28.07358506 |

|          |             |             |             |             |             |             |             |
|----------|-------------|-------------|-------------|-------------|-------------|-------------|-------------|
| BTN3A1   | 1.539182869 | 0.000101543 | 0.001005747 | 27.03429566 | 10.54601409 | 40.43192274 | 46.57616252 |
| FMNL2    | 1.538310072 | 6.35E-09    | 2.08E-07    | 31.73577603 | 30.40601897 | 58.7237709  | 85.21181277 |
| BARD1    | 1.536330161 | 0.000603666 | 0.004499746 | 4.937337961 | 3.6038      | 7.821972728 | 11.98130504 |
| C15orf48 | 1.536256504 | 3.70E-11    | 1.97E-09    | 73.18716122 | 71.79567514 | 178.2515374 | 155.323112  |
| HACD4    | 1.53501843  | 4.14E-07    | 8.75E-06    | 22.01938328 | 13.0944218  | 42.57648425 | 38.28190366 |
| TATDN3   | 1.534533218 | 1.07E-09    | 4.21E-08    | 24.21340745 | 16.87309529 | 47.2440593  | 47.42685573 |
| USP6NL   | 1.534200521 | 2.02E-07    | 4.56E-06    | 14.65373071 | 13.00654567 | 28.5737591  | 35.2335863  |
| GAS6     | 1.532498825 | 0.000311769 | 0.002599156 | 32.7544301  | 9.403624432 | 54.30849721 | 42.46447864 |
| TRIM22   | 1.532359893 | 1.18E-05    | 0.000162428 | 221.9890147 | 81.90142984 | 311.2774263 | 388.6966178 |
| IL10     | 1.530708294 | 1.13E-07    | 2.71E-06    | 28.52309778 | 18.36698946 | 43.58568966 | 64.58250227 |
| ESR1     | 1.53062911  | 0.007892666 | 0.036308275 | 1.567943701 | 1.23114455  | 2.839020986 | 3.616155081 |
| PDGFB    | 1.530565682 | 0.000153956 | 0.001435295 | 6.112708051 | 18.71849398 | 26.23997157 | 30.69655581 |
| GALM     | 1.528789608 | 1.35E-17    | 2.90E-15    | 171.9182488 | 138.5815322 | 331.6507606 | 381.182161  |
| RAB39A   | 1.528648533 | 0.001180867 | 0.007781321 | 4.467189924 | 4.570437405 | 8.389650775 | 12.40665165 |
| TMEM123  | 1.52813375  | 4.39E-07    | 9.15E-06    | 257.4851914 | 154.1356069 | 398.0060167 | 548.1307048 |
| SOS1     | 1.526071625 | 4.14E-09    | 1.43E-07    | 23.27311137 | 26.10008871 | 49.07324411 | 64.15715566 |
| KCNJ5    | 1.524889855 | 0.002548482 | 0.014610934 | 3.37017784  | 2.373534211 | 5.614335881 | 7.586056758 |
| IL1R2    | 1.524145225 | 5.03E-08    | 1.29E-06    | 22.56788932 | 25.1334513  | 48.31634005 | 60.89616499 |
| MYPOP    | 1.521870466 | 8.89E-05    | 0.00089932  | 8.698522251 | 5.624950938 | 18.79708163 | 13.82447368 |
| RNF149   | 1.518048728 | 4.21E-16    | 6.08E-14    | 47.48573524 | 51.14478512 | 104.6426173 | 120.0193435 |
| NHLRC3   | 1.513922483 | 2.18E-07    | 4.89E-06    | 47.40737723 | 23.02442424 | 72.09574267 | 88.18923903 |
| CBWD3    | 1.513132547 | 4.68E-07    | 9.69E-06    | 10.73583041 | 8.70061541  | 23.14927999 | 20.91358382 |
| MAML2    | 1.512392599 | 4.57E-07    | 9.50E-06    | 18.57163101 | 25.30920356 | 41.44112815 | 58.27319424 |
| MICB     | 1.508496011 | 5.72E-09    | 1.91E-07    | 33.45965216 | 27.15460224 | 55.38077796 | 82.23438651 |
| STARD4   | 1.507936665 | 1.75E-07    | 3.97E-06    | 23.19475337 | 17.92760883 | 40.68422409 | 52.53101503 |
| TMEM60   | 1.507226148 | 1.40E-10    | 6.70E-09    | 33.14622014 | 24.60619454 | 68.62659905 | 61.74685821 |
| RERE     | 1.50320136  | 6.74E-14    | 6.66E-12    | 69.81776696 | 58.61425598 | 138.9556015 | 150.5734082 |

|          |             |             |             |             |             |             |             |
|----------|-------------|-------------|-------------|-------------|-------------|-------------|-------------|
| TNFSF13  | 1.50145712  | 2.23E-08    | 6.16E-07    | 139.4780343 | 77.33187119 | 254.8249983 | 232.5235214 |
| MRPL40   | 1.500985506 | 5.39E-07    | 1.11E-05    | 65.35136062 | 30.58177122 | 112.5270346 | 103.1472614 |
| GNB4     | 1.499121178 | 1.26E-06    | 2.33E-05    | 71.30656908 | 39.80876464 | 102.1826791 | 148.3757841 |
| PTBP3    | 1.499119735 | 9.73E-11    | 4.82E-09    | 72.79537119 | 69.86240033 | 136.3695126 | 184.9555924 |
| PSME1    | 1.49900475  | 2.69E-07    | 5.91E-06    | 243.6158244 | 122.0608202 | 427.7775765 | 392.7374105 |
| CYSLTR1  | 1.498834622 | 0.000254408 | 0.002178852 | 8.620164244 | 3.515923872 | 11.29111635 | 16.16388003 |
| LPAR6    | 1.49307621  | 3.47E-10    | 1.52E-08    | 176.4630132 | 114.6792255 | 291.0302426 | 361.5453259 |
| NREP     | 1.492955722 | 8.55E-05    | 0.000873855 | 5.799276027 | 5.185570299 | 11.29111635 | 13.32823597 |
| GIMAP2   | 1.492945091 | 1.45E-06    | 2.62E-05    | 43.72455095 | 20.73964491 | 73.48340011 | 70.75002809 |
| ARHGAP25 | 1.491911514 | 1.71E-08    | 4.86E-07    | 114.5601884 | 61.77779658 | 193.1373173 | 201.1896546 |
| CSF3R    | 1.486710225 | 5.18E-09    | 1.75E-07    | 58.06406606 | 34.36044472 | 104.0749393 | 101.8003305 |
| PELI1    | 1.48497597  | 3.20E-06    | 5.25E-05    | 20.76565518 | 19.421503   | 37.0889298  | 52.60190613 |
| RNF217   | 1.482381267 | 9.82E-06    | 0.000139451 | 10.10896636 | 6.415836088 | 17.85095155 | 18.92863298 |
| ENTPD5   | 1.482026003 | 5.49E-05    | 0.000598609 | 14.5753727  | 7.733978005 | 20.43704043 | 29.34962488 |
| PARP9    | 1.480809366 | 2.19E-05    | 0.000271157 | 282.1679633 | 99.65240765 | 400.5921056 | 447.0399942 |
| TYMP     | 1.479418903 | 1.75E-06    | 3.08E-05    | 2593.494067 | 1246.347999 | 4677.289282 | 3811.035428 |
| HERPUD2  | 1.477115583 | 2.74E-10    | 1.25E-08    | 29.14996183 | 27.50610675 | 56.38998338 | 69.19042386 |
| USP25    | 1.475524617 | 2.14E-06    | 3.70E-05    | 33.14622014 | 19.86088364 | 51.97470968 | 65.50408658 |
| GPBP1    | 1.474198413 | 1.24E-13    | 1.15E-11    | 55.71332587 | 49.21151031 | 108.1748363 | 123.7765719 |
| SUSD1    | 1.473196993 | 2.23E-10    | 1.03E-08    | 32.91114612 | 46.75097873 | 78.46635186 | 97.47597331 |
| TRIP4    | 1.472114278 | 2.74E-12    | 1.85E-10    | 35.41860231 | 30.40601897 | 68.12199634 | 77.20111831 |
| CCNJ     | 1.470379646 | 2.74E-05    | 0.000328522 | 11.12762044 | 8.173358643 | 18.48170494 | 24.17457448 |
| LMBR1    | 1.469519683 | 8.49E-07    | 1.65E-05    | 11.20597844 | 9.315748304 | 20.94164314 | 24.31635668 |
| SNN      | 1.469442667 | 2.56E-15    | 3.30E-13    | 117.6945087 | 102.3765676 | 235.2716434 | 249.1829303 |
| IFI16    | 1.467628234 | 2.38E-06    | 4.08E-05    | 242.1270222 | 111.1641804 | 347.8611226 | 430.097021  |
| DGKG     | 1.466937383 | 0.000643185 | 0.004725968 | 7.679868172 | 3.867428383 | 11.92186973 | 13.54090927 |
| BLOC1S3  | 1.465105918 | 3.02E-10    | 1.36E-08    | 36.35889838 | 26.80309773 | 68.68967439 | 69.97022597 |

|          |             |             |             |             |             |             |             |
|----------|-------------|-------------|-------------|-------------|-------------|-------------|-------------|
| UBXN2A   | 1.464565028 | 0.000786991 | 0.005572655 | 3.213461828 | 4.043180638 | 6.182013927 | 9.783680901 |
| ACE      | 1.464077783 | 2.69E-11    | 1.49E-09    | 142.7690706 | 100.0917883 | 272.8014698 | 259.3203578 |
| STK3     | 1.463304477 | 0.000389261 | 0.003124264 | 8.698522251 | 5.976455449 | 13.30952718 | 18.99952408 |
| LARP7    | 1.461247104 | 1.42E-08    | 4.18E-07    | 37.76934249 | 25.7485842  | 63.51749663 | 75.78329628 |
| MAX      | 1.460844371 | 1.29E-12    | 9.78E-11    | 92.93337874 | 69.24726744 | 165.7626203 | 189.4926229 |
| FOXN2    | 1.460513068 | 6.88E-05    | 0.000732977 | 22.95967935 | 17.2245998  | 33.05210813 | 55.29576799 |
| TMX1     | 1.458504959 | 2.14E-07    | 4.81E-06    | 34.79173826 | 25.39707969 | 53.99312052 | 77.98092043 |
| DOCK8    | 1.456397428 | 2.19E-10    | 1.02E-08    | 93.95203282 | 93.58895483 | 177.7469347 | 232.1690659 |
| SRD5A1   | 1.454161037 | 1.78E-07    | 4.05E-06    | 10.26568237 | 9.843005071 | 20.31088975 | 23.53655457 |
| UBP1     | 1.453031173 | 1.96E-10    | 9.20E-09    | 48.66110533 | 39.54513626 | 82.18779683 | 110.3072627 |
| RAB12    | 1.452139535 | 5.37E-09    | 1.81E-07    | 37.37755246 | 24.60619454 | 62.94981858 | 72.09695901 |
| CDC73    | 1.450787891 | 1.09E-06    | 2.07E-05    | 25.62385156 | 24.07893777 | 45.35179914 | 62.95200693 |
| C6orf62  | 1.446949653 | 1.46E-05    | 0.000193347 | 407.384057  | 148.6872869 | 542.1331652 | 664.7465665 |
| GPD2     | 1.445479583 | 1.42E-07    | 3.32E-06    | 48.50438932 | 30.23026671 | 74.36645485 | 96.55438899 |
| IL12RB1  | 1.44544129  | 7.24E-05    | 0.000765541 | 23.89997542 | 10.63389022 | 38.35043657 | 36.43873502 |
| PARP12   | 1.444858386 | 6.59E-07    | 1.33E-05    | 260.9329437 | 117.75489   | 406.5842628 | 412.65781   |
| RIMKLB   | 1.444767755 | 0.000468812 | 0.003649098 | 7.444794154 | 4.921941916 | 14.06643124 | 12.69021606 |
| ACTN2    | 1.442218113 | 0.003586412 | 0.01926145  | 0.862721647 | 0.703887783 | 2.019041586 | 1.347639837 |
| NR4A2    | 1.440767894 | 4.15E-05    | 0.00047186  | 9.011954275 | 15.02769661 | 24.78923879 | 27.01021854 |
| ERAP2    | 1.438093858 | 1.17E-05    | 0.00016091  | 39.33650261 | 17.66398044 | 58.78684624 | 64.15715566 |
| SYNGR2   | 1.437865243 | 2.03E-09    | 7.47E-08    | 402.7609346 | 291.2223662 | 837.0103727 | 652.9786437 |
| GLRX     | 1.435145197 | 9.20E-14    | 8.85E-12    | 112.0527322 | 98.68577024 | 234.073212  | 218.3453012 |
| VRK2     | 1.434431401 | 4.98E-06    | 7.76E-05    | 25.38877754 | 18.19123721 | 42.8287856  | 50.9714108  |
| CXorf21  | 1.434348567 | 1.54E-07    | 3.56E-06    | 26.95593766 | 21.61840619 | 47.81173734 | 56.71359001 |
| SP140L   | 1.433948742 | 6.11E-10    | 2.51E-08    | 38.63128056 | 28.20911577 | 67.68046897 | 76.06686069 |
| CALCOCO2 | 1.433793901 | 1.39E-08    | 4.09E-07    | 83.295344   | 50.00239546 | 124.5744243 | 162.4122222 |
| SGPP1    | 1.43361121  | 3.97E-05    | 0.000453922 | 11.67612648 | 8.173358643 | 19.68013637 | 23.04031686 |



|           |             |             |             |             |             |             |             |
|-----------|-------------|-------------|-------------|-------------|-------------|-------------|-------------|
| PRR5      | 1.431246391 | 0.000136493 | 0.001295878 | 21.54923524 | 8.788491538 | 33.99823821 | 31.05101131 |
| WDR44     | 1.431112956 | 9.19E-06    | 0.000131598 | 10.73583041 | 9.052119921 | 18.16632824 | 24.38724779 |
| DEK       | 1.430016054 | 1.11E-06    | 2.09E-05    | 85.33265216 | 58.61425598 | 126.9712872 | 182.3326217 |
| RHPN1     | 1.429727539 | 2.14E-05    | 0.00026633  | 14.10522467 | 13.53380244 | 34.81821761 | 24.10368338 |
| LOC648987 | 1.427759655 | 2.95E-05    | 0.000349188 | 12.61642255 | 7.382473493 | 20.0585884  | 22.82764355 |
| FLT3LG    | 1.427503231 | 0.000756187 | 0.005402242 | 8.071658202 | 5.097694172 | 16.58944478 | 11.48506733 |
| DLGAP4    | 1.425008922 | 5.50E-15    | 6.51E-13    | 46.46708116 | 42.5329246  | 91.90139896 | 98.11399322 |
| RNF114    | 1.421836396 | 3.27E-12    | 2.18E-10    | 128.1944815 | 92.97382194 | 239.1823144 | 231.531046  |
| WASHC4    | 1.419531381 | 1.26E-05    | 0.000171279 | 55.55660986 | 36.2058434  | 70.0142565  | 126.1868694 |
| EXOC6     | 1.418207031 | 1.13E-06    | 2.13E-05    | 11.75448449 | 10.80964248 | 22.32930058 | 25.66328761 |
| TNF       | 1.416472424 | 0.000238887 | 0.002075485 | 36.43725639 | 109.9339146 | 167.7810312 | 141.9246939 |
| CDK17     | 1.414872588 | 0.000282853 | 0.002402499 | 6.661214093 | 7.11884511  | 11.85879439 | 17.43991985 |
| FCGR1B    | 1.412393698 | 3.24E-07    | 7.00E-06    | 13.63507663 | 13.88530695 | 32.23212873 | 25.80506981 |
| GMDS      | 1.411331304 | 0.000335654 | 0.0027679   | 9.168670287 | 4.043180638 | 14.38180793 | 13.61180038 |
| SHOC2     | 1.411008912 | 1.24E-08    | 3.72E-07    | 31.10891198 | 25.1334513  | 56.20075736 | 62.81022473 |
| ERP44     | 1.406486043 | 2.55E-12    | 1.74E-10    | 125.0601612 | 88.84364393 | 219.2505074 | 231.6019371 |
| IGSF6     | 1.397008076 | 8.77E-08    | 2.15E-06    | 76.71327149 | 85.94373172 | 164.3118876 | 176.1650958 |
| FAM177A1  | 1.396698718 | 6.34E-07    | 1.28E-05    | 17.63133494 | 14.23681146 | 33.17825881 | 33.53219986 |
| RGS2      | 1.395528387 | 5.91E-05    | 0.000637685 | 69.81776696 | 42.5329246  | 111.0763019 | 124.0601363 |
| USP42     | 1.390710674 | 0.000196968 | 0.001769894 | 10.81418841 | 6.152207705 | 17.2832735  | 18.14883086 |
| P2RY6     | 1.388896209 | 9.11E-09    | 2.86E-07    | 226.220347  | 143.941976  | 394.0322704 | 375.7944373 |
| NECTIN2   | 1.385248877 | 9.76E-09    | 3.02E-07    | 230.4516793 | 153.8719785 | 439.3834388 | 356.5829488 |
| DDX60     | 1.38119009  | 0.001931845 | 0.011563028 | 42.62753887 | 12.91866954 | 46.1087032  | 69.40309716 |
| TRPC2     | 1.381139218 | 0.003301852 | 0.017980763 | 1.803017719 | 2.285658083 | 4.857431818 | 3.54526398  |
| PAX8-AS1  | 1.37891209  | 4.07E-06    | 6.48E-05    | 51.63870956 | 24.25469002 | 78.40327652 | 78.54804924 |
| CREG1     | 1.378138822 | 3.40E-10    | 1.50E-08    | 887.013412  | 578.4015517 | 1445.498163 | 1583.211676 |
| GOLGA4    | 1.377977403 | 2.55E-05    | 0.000308158 | 26.64250563 | 21.70628232 | 39.67501867 | 60.61260059 |

|            |             |             |             |             |             |             |             |
|------------|-------------|-------------|-------------|-------------|-------------|-------------|-------------|
| SFT2D2     | 1.376893926 | 4.74E-06    | 7.42E-05    | 14.4970147  | 13.35805018 | 32.29520407 | 25.0252677  |
| GTF2B      | 1.372783868 | 2.02E-12    | 1.41E-10    | 42.31410684 | 38.49062272 | 84.269283   | 81.9508221  |
| PAX8       | 1.372392396 | 5.29E-06    | 8.18E-05    | 49.05289536 | 25.48495581 | 81.55704344 | 71.6716124  |
| CENPN      | 1.371960853 | 1.37E-06    | 2.50E-05    | 14.73208872 | 10.28238571 | 26.1138209  | 25.3797232  |
| STOML1     | 1.371770482 | 8.63E-05    | 0.000879906 | 9.403744305 | 7.206721238 | 17.03097215 | 17.15635544 |
| LMO4       | 1.371537247 | 2.66E-12    | 1.80E-10    | 36.20218237 | 31.02115186 | 63.01289392 | 75.49973188 |
| BTN3A3     | 1.370700312 | 9.97E-05    | 0.000992115 | 40.59023071 | 16.43371465 | 57.14688744 | 60.18725398 |
| SRGN       | 1.369000661 | 1.19E-13    | 1.11E-11    | 670.3535253 | 499.4009128 | 1123.813937 | 1279.514198 |
| KIAA1328   | 1.367203575 | 0.001939159 | 0.011592379 | 1.881375725 | 1.406896806 | 3.09132234  | 3.687046183 |
| LCP2       | 1.361887404 | 8.19E-09    | 2.61E-07    | 166.0413984 | 111.7793133 | 253.7527176 | 314.8280901 |
| TIPRL      | 1.357118621 | 4.50E-08    | 1.17E-06    | 31.65741802 | 21.09114942 | 49.51477148 | 58.13141204 |
| RRBP1      | 1.356357975 | 4.01E-10    | 1.73E-08    | 216.5039543 | 142.9753386 | 347.7349719 | 384.3013695 |
| ZNF277     | 1.351207589 | 2.46E-05    | 0.000299338 | 24.05669143 | 15.46707725 | 37.40430649 | 42.88982524 |
| MYD88      | 1.350152537 | 1.33E-08    | 3.94E-07    | 213.604708  | 130.145424  | 310.8358989 | 386.9952313 |
| PTP4A1     | 1.347990496 | 7.74E-10    | 3.09E-08    | 92.46323071 | 77.33187119 | 154.2198334 | 189.9179695 |
| KLF6       | 1.347371236 | 1.26E-08    | 3.77E-07    | 269.0038183 | 392.8071699 | 659.8948222 | 678.0032025 |
| GPR160     | 1.347293447 | 8.00E-05    | 0.000829802 | 8.698522251 | 6.767340599 | 12.17417109 | 19.28308849 |
| SCAMP1-AS1 | 1.344990362 | 0.000138828 | 0.001314585 | 11.51941047 | 7.11884511  | 19.36475968 | 18.29061307 |
| UTRN       | 1.344828834 | 2.54E-06    | 4.33E-05    | 36.28054038 | 30.66964735 | 56.20075736 | 79.39874245 |
| GIMAP7     | 1.343410736 | 0.002535862 | 0.014573885 | 21.15744521 | 6.32795996  | 25.60921819 | 29.98764479 |
| RCSD1      | 1.343212844 | 1.63E-07    | 3.73E-06    | 63.62748448 | 39.369384   | 89.50453609 | 118.8141948 |
| CBWD6      | 1.342065923 | 0.000158255 | 0.001466785 | 7.836584184 | 6.064331577 | 15.07563666 | 12.90288936 |
| SCARNA9    | 1.341436648 | 0.009673256 | 0.042794225 | 11.9895585  | 4.306809022 | 18.73400629 | 14.03714698 |
| FAM126B    | 1.340965888 | 0.002823141 | 0.015858604 | 7.444794154 | 6.064331577 | 11.41726702 | 15.88031562 |
| ABCD1      | 1.33879883  | 2.83E-15    | 3.59E-13    | 102.9632035 | 107.2097546 | 211.6183914 | 210.6181711 |
| DUSP4      | 1.336913216 | 6.78E-05    | 0.00072351  | 2.116449743 | 3.779552255 | 4.920507157 | 6.877145745 |
| CYBA       | 1.336877672 | 9.84E-07    | 1.88E-05    | 848.382915  | 542.7238438 | 1636.237987 | 1145.600907 |

|           |             |             |             |             |             |             |             |
|-----------|-------------|-------------|-------------|-------------|-------------|-------------|-------------|
| C2CD2L    | 1.334893717 | 2.56E-07    | 5.66E-06    | 71.85507512 | 42.18142009 | 120.0960753 | 108.3223118 |
| ZBED1     | 1.333781889 | 7.57E-08    | 1.87E-06    | 94.73561288 | 58.08699921 | 148.732279  | 157.5916273 |
| DRAP1     | 1.332954018 | 4.44E-05    | 0.000498405 | 316.0969799 | 129.0909104 | 488.0145248 | 401.3152338 |
| SRGAP2    | 1.331112008 | 1.68E-10    | 7.94E-09    | 156.0899316 | 108.6157727 | 249.7158959 | 280.0914505 |
| TRIM26    | 1.330830651 | 1.04E-08    | 3.20E-07    | 73.73566726 | 50.09027159 | 117.3207604 | 130.5112265 |
| LINC01410 | 1.330322894 | 0.002766509 | 0.015576857 | 6.347782069 | 3.955304511 | 10.40806161 | 10.20902751 |
| WIPF1     | 1.3297928   | 2.65E-09    | 9.57E-08    | 242.9106023 | 179.1803033 | 372.7758813 | 472.1354441 |
| ODF3B     | 1.329780869 | 2.00E-05    | 0.000250915 | 53.67601772 | 29.70300995 | 96.50589867 | 69.54487936 |
| CEP57L1   | 1.329661277 | 0.003362022 | 0.018222435 | 5.485844003 | 2.988667105 | 7.380445359 | 9.641898698 |
| MED13     | 1.328567588 | 1.59E-07    | 3.66E-06    | 29.22831983 | 31.4605325  | 49.7039975  | 71.81339461 |
| ACSS1     | 1.327171256 | 7.58E-09    | 2.45E-07    | 18.25819899 | 16.34583853 | 36.64740243 | 32.25616004 |
| HES6      | 1.327082365 | 0.005771413 | 0.028396613 | 2.97838781  | 2.637162594 | 7.75889739  | 3.332590676 |
| CTNBL1    | 1.326308979 | 1.12E-11    | 6.74E-10    | 96.06769899 | 75.134968   | 162.4827027 | 179.0007399 |
| C4orf33   | 1.325992301 | 0.000292723 | 0.002470341 | 17.47461893 | 7.733978005 | 23.71695803 | 26.65576303 |
| PHACTR4   | 1.325307113 | 2.13E-08    | 5.94E-07    | 36.98576243 | 28.73637254 | 57.58841481 | 73.65656324 |
| EMP1      | 1.325002508 | 5.64E-09    | 1.88E-07    | 266.1045721 | 397.8161092 | 553.7390275 | 771.7212385 |
| PLEKHO1   | 1.321593461 | 8.29E-09    | 2.64E-07    | 577.2642141 | 393.9495595 | 1046.357421 | 878.7668016 |
| TLE4      | 1.319258572 | 2.59E-11    | 1.45E-09    | 53.83273373 | 49.56301482 | 93.09983039 | 112.2922135 |
| SAMSN1    | 1.314076966 | 1.18E-06    | 2.21E-05    | 112.8363123 | 68.63213455 | 156.1120936 | 203.3872788 |
| HLA-B     | 1.311591428 | 8.31E-08    | 2.05E-06    | 4467.033992 | 3198.252549 | 8503.25009  | 6572.810955 |
| PDE7A     | 1.311050277 | 1.24E-07    | 2.92E-06    | 24.60519748 | 32.86655055 | 50.90242893 | 62.52666033 |
| TNK2      | 1.310057681 | 2.82E-06    | 4.73E-05    | 105.4706597 | 57.47186632 | 168.4117846 | 152.3456858 |
| DMXL1     | 1.308598506 | 1.06E-05    | 0.00014929  | 33.77308418 | 30.84539961 | 52.41623705 | 75.21616747 |
| C3orf58   | 1.308287937 | 0.000134361 | 0.001278161 | 10.50075639 | 16.17008627 | 21.88777322 | 30.69655581 |
| CLEC2B    | 1.308062434 | 5.00E-08    | 1.28E-06    | 51.40363554 | 41.47841107 | 95.11824122 | 87.48032801 |
| FAM72B    | 1.307903687 | 0.00405543  | 0.021366889 | 5.094053973 | 3.955304511 | 9.02040416  | 8.791205482 |
| OGFRL1    | 1.307814511 | 5.45E-08    | 1.39E-06    | 75.92969143 | 53.42956444 | 118.2038151 | 136.6787524 |

|          |             |             |             |             |             |             |             |
|----------|-------------|-------------|-------------|-------------|-------------|-------------|-------------|
| TNFSF8   | 1.307031493 | 1.43E-08    | 4.19E-07    | 50.93348751 | 36.99672855 | 75.50181095 | 97.90131991 |
| STAC3    | 1.306715939 | 2.50E-05    | 0.000303489 | 81.33639385 | 38.13911821 | 128.4850953 | 105.9829055 |
| MYL12A   | 1.305140491 | 2.77E-10    | 1.26E-08    | 665.7304029 | 449.6630245 | 1125.580046 | 1062.800101 |
| CAST     | 1.304758412 | 8.81E-09    | 2.79E-07    | 136.6571461 | 116.7882526 | 215.9075145 | 282.8562034 |
| ADAP2    | 1.304370813 | 1.64E-14    | 1.85E-12    | 290.708986  | 244.6480185 | 526.6166319 | 523.7441659 |
| CASP4    | 1.304008316 | 3.45E-11    | 1.87E-09    | 101.1609694 | 77.41974732 | 172.7009076 | 177.7955912 |
| EREG     | 1.303202704 | 0.003616544 | 0.019401615 | 13.00821258 | 43.14805749 | 56.32690804 | 53.59438155 |
| SCARB2   | 1.302328056 | 8.98E-13    | 7.12E-11    | 436.3765192 | 343.0692816 | 716.8518529 | 812.2000574 |
| PATL1    | 1.3013529   | 2.80E-06    | 4.70E-05    | 96.85127905 | 63.44744301 | 136.6848893 | 178.0791556 |
| SLC25A28 | 1.294635359 | 8.65E-07    | 1.67E-05    | 59.08272013 | 36.55734791 | 96.0643713  | 90.31597207 |
| CLDN23   | 1.293842257 | 1.50E-09    | 5.69E-08    | 60.57152225 | 44.72982779 | 102.6242065 | 102.5801326 |
| UNC93B1  | 1.292453046 | 2.24E-09    | 8.17E-08    | 555.0105404 | 392.3677892 | 979.6237131 | 861.540264  |
| FYB      | 1.29123468  | 5.10E-05    | 0.000563875 | 79.84759173 | 53.25381219 | 106.0302748 | 153.7635078 |
| CCNK     | 1.289866168 | 1.23E-07    | 2.92E-06    | 46.23200714 | 34.09681633 | 68.8789004  | 87.62211021 |
| USP15    | 1.287331032 | 1.45E-06    | 2.61E-05    | 88.93712044 | 53.69319283 | 132.7742183 | 144.122318  |
| MFHAS1   | 1.287157474 | 0.001152713 | 0.007623648 | 6.347782069 | 7.90973026  | 12.3633971  | 15.31318681 |
| CKAP4    | 1.286731384 | 2.04E-12    | 1.42E-10    | 69.66105095 | 73.5531977  | 133.3418964 | 144.4058824 |
| ATG4C    | 1.286145988 | 5.41E-06    | 8.33E-05    | 24.68355548 | 15.90645789 | 37.27815581 | 41.54289432 |
| LIPA     | 1.285416831 | 8.19E-06    | 0.000119056 | 750.9055555 | 346.5843267 | 954.8981804 | 1174.666259 |
| HLA-E    | 1.282292793 | 2.80E-08    | 7.59E-07    | 2547.497918 | 1546.532851 | 4114.783414 | 3789.059186 |
| CD164    | 1.282002033 | 6.57E-09    | 2.15E-07    | 246.4367126 | 176.1046388 | 360.4761903 | 457.8154416 |
| CNTLN    | 1.281503869 | 0.001777481 | 0.010804897 | 9.717176329 | 5.449198683 | 12.3633971  | 17.08546434 |
| KARS     | 1.281218528 | 1.11E-09    | 4.34E-08    | 158.8324618 | 107.8248875 | 246.8144303 | 268.607092  |
| TTC21A   | 1.280136632 | 0.009434715 | 0.041854405 | 6.817930106 | 3.428047744 | 10.09268491 | 9.7127898   |
| FCGR1A   | 1.279826968 | 1.16E-09    | 4.51E-08    | 45.29171107 | 42.97230524 | 85.59386511 | 84.64468396 |
| HOXB2    | 1.279356926 | 0.007398657 | 0.03451989  | 2.429881767 | 3.164419361 | 5.172808511 | 5.60110592  |
| SLC25A30 | 1.277728895 | 8.50E-06    | 0.000122729 | 18.49327301 | 19.06999849 | 30.33986858 | 42.25180533 |

|          |             |             |             |             |             |             |             |
|----------|-------------|-------------|-------------|-------------|-------------|-------------|-------------|
| 43891    | 1.277243386 | 4.01E-05    | 0.0004574   | 119.8101748 | 67.92912552 | 160.9058193 | 201.473219  |
| ACOT9    | 1.276599279 | 5.64E-09    | 1.88E-07    | 127.0974694 | 88.31638716 | 208.9061519 | 205.7266851 |
| LATS1    | 1.276571917 | 5.34E-05    | 0.000584414 | 14.73208872 | 14.76406823 | 23.71695803 | 33.24863546 |
| GOPC     | 1.275990325 | 3.39E-05    | 0.000392845 | 14.88880473 | 13.70955469 | 25.48306751 | 29.63318929 |
| ADPRH    | 1.274824555 | 1.10E-06    | 2.09E-05    | 43.80290896 | 26.89097386 | 61.56216114 | 74.71992976 |
| SIGLEC14 | 1.274530147 | 6.28E-06    | 9.48E-05    | 37.69098449 | 23.72743326 | 54.18234653 | 64.15715566 |
| TMEM106A | 1.273347485 | 1.54E-08    | 4.44E-07    | 120.3586809 | 78.38638473 | 177.1792566 | 205.1595563 |
| CNOT4    | 1.27133793  | 0.000188065 | 0.001701712 | 14.18358267 | 15.99433401 | 24.9784648  | 33.03596215 |
| CARD16   | 1.266545902 | 6.93E-06    | 0.000103486 | 71.6200011  | 38.66637498 | 115.4285002 | 95.06567586 |
| NEDD1    | 1.265852584 | 0.001504496 | 0.009445291 | 8.933596269 | 6.240083833 | 12.04802041 | 17.08546434 |
| ARHGAP12 | 1.265010865 | 5.34E-05    | 0.000584414 | 12.45970654 | 12.4792889  | 21.88777322 | 25.80506981 |
| GNG5     | 1.264946364 | 2.67E-09    | 9.62E-08    | 175.3660011 | 123.5547144 | 279.9920584 | 291.0086801 |
| RAP1GAP2 | 1.260403104 | 0.00015714  | 0.001459682 | 11.04926243 | 8.085482516 | 16.27406809 | 20.27556391 |
| NRSN2    | 1.26032281  | 0.001324487 | 0.008570994 | 3.213461828 | 2.988667105 | 5.046657834 | 6.806254643 |
| DNAJC15  | 1.260063156 | 5.43E-06    | 8.36E-05    | 43.33276092 | 24.34256615 | 62.94981858 | 66.00032429 |
| DECR1    | 1.25923911  | 3.38E-06    | 5.50E-05    | 80.31773977 | 43.85106652 | 112.968562  | 123.4930075 |
| ANXA4    | 1.256709737 | 5.24E-11    | 2.71E-09    | 195.8957987 | 146.9297644 | 303.1407076 | 348.6431455 |
| DIAPH2   | 1.255889214 | 0.00024573  | 0.002118353 | 12.38134853 | 7.558225749 | 16.52636944 | 21.48071263 |
| PLEK     | 1.255150877 | 8.53E-10    | 3.39E-08    | 327.3021748 | 230.7635903 | 495.7097161 | 563.9394204 |
| STAT2    | 1.254816434 | 2.41E-05    | 0.000294001 | 360.9961174 | 158.353661  | 463.0997661 | 522.7516905 |
| FANCA    | 1.253526984 | 0.00024807  | 0.002134704 | 14.88880473 | 8.173358643 | 23.14927999 | 20.55912831 |
| MEF2A    | 1.253077047 | 3.57E-06    | 5.79E-05    | 70.366273   | 43.85106652 | 96.82127536 | 120.0193435 |
| MIA3     | 1.253062368 | 1.17E-06    | 2.19E-05    | 42.94097089 | 32.51504603 | 65.22053077 | 77.98092043 |
| ATP6V1G1 | 1.252321166 | 7.58E-13    | 6.11E-11    | 101.6311174 | 98.2463896  | 178.5038387 | 200.1971792 |
| ZNF766   | 1.251704844 | 0.000840407 | 0.005847598 | 20.92237119 | 11.24902312 | 30.71832061 | 30.2003181  |
| TMSB10   | 1.251087562 | 2.94E-05    | 0.000347689 | 2524.303948 | 1267.701898 | 4052.086527 | 3099.076097 |
| SLC25A32 | 1.250918832 | 7.14E-05    | 0.000756445 | 7.053004124 | 6.503712216 | 10.84958898 | 14.8878402  |

|         |             |             |             |             |             |             |             |
|---------|-------------|-------------|-------------|-------------|-------------|-------------|-------------|
| RASA2   | 1.249533224 | 0.004679673 | 0.023922197 | 7.288078142 | 3.691676127 | 8.137349421 | 12.76110716 |
| RBMS1   | 1.246612691 | 7.69E-07    | 1.52E-05    | 43.56783494 | 38.93000336 | 64.02209934 | 92.0882496  |
| OCEL1   | 1.245537496 | 0.000171825 | 0.001577358 | 9.560460317 | 10.54601409 | 20.75241712 | 17.01457324 |
| BMPR2   | 1.244981435 | 9.52E-05    | 0.000953346 | 31.89249204 | 18.8063701  | 39.73809401 | 56.1464612  |
| TCF7L2  | 1.241627068 | 0.000425438 | 0.00336595  | 5.720918021 | 7.206721238 | 12.86799981 | 11.34328513 |
| CIR1    | 1.241155505 | 1.39E-05    | 0.000187291 | 61.90360835 | 39.45726013 | 89.50453609 | 101.1623106 |
| ARID5A  | 1.238225553 | 1.63E-10    | 7.72E-09    | 78.75057965 | 72.41080804 | 152.1383472 | 130.7238999 |
| PPP2R5C | 1.238136112 | 6.30E-09    | 2.07E-07    | 70.05284098 | 54.83558249 | 114.4192948 | 119.8066702 |
| STX17   | 1.237792383 | 9.57E-06    | 0.000136251 | 17.63133494 | 15.81858176 | 28.63683444 | 34.17021978 |
| AGPAT3  | 1.236926454 | 2.15E-11    | 1.22E-09    | 157.8921658 | 124.1698473 | 253.1219642 | 275.55442   |
| LMF2    | 1.236757422 | 5.90E-09    | 1.96E-07    | 95.12740291 | 77.68337571 | 171.8178528 | 151.3532104 |
| NUP205  | 1.236038116 | 8.22E-07    | 1.60E-05    | 38.55292255 | 24.86982292 | 57.20996278 | 61.67596711 |
| COG5    | 1.235105726 | 1.98E-05    | 0.000249783 | 28.05294974 | 19.59725525 | 36.83662844 | 52.67279724 |
| DENND1A | 1.234550884 | 1.51E-07    | 3.50E-06    | 42.94097089 | 31.54840863 | 61.62523647 | 78.05181153 |
| FKBP1B  | 1.233913803 | 8.12E-05    | 0.000839958 | 13.63507663 | 10.98539473 | 24.28463608 | 21.69338593 |
| UBA7    | 1.233800486 | 4.33E-05    | 0.000489347 | 147.862341  | 66.96248812 | 208.0861725 | 193.1080691 |
| SLC35A3 | 1.232643398 | 0.002735848 | 0.015452453 | 4.1537579   | 4.39468515  | 8.074274082 | 7.869621164 |
| SMIM14  | 1.230776521 | 1.10E-07    | 2.64E-06    | 18.88506304 | 21.0032733  | 36.83662844 | 37.50210154 |
| NUDCD1  | 1.230613343 | 0.000346126 | 0.002846126 | 8.385090226 | 6.591588344 | 12.42647244 | 15.59675121 |
| NUP160  | 1.230034239 | 5.98E-05    | 0.000644142 | 15.51566878 | 14.50043984 | 22.64467728 | 33.53219986 |
| BAZ1A   | 1.229936661 | 6.32E-07    | 1.28E-05    | 59.47451016 | 54.5719541  | 91.1444949  | 122.0042944 |
| C2CD5   | 1.229185646 | 1.71E-05    | 0.000221572 | 21.15744521 | 15.99433401 | 30.84447128 | 38.56546806 |
| ZBTB41  | 1.228583908 | 0.006284291 | 0.030457105 | 4.702263942 | 2.725038722 | 6.245089266 | 7.65694786  |
| SLC35A5 | 1.227084234 | 8.79E-06    | 0.000126375 | 21.94102527 | 14.58831597 | 30.52909459 | 37.64388374 |
| RIC1    | 1.2268398   | 2.44E-05    | 0.000297532 | 24.05669143 | 23.63955713 | 38.7288886  | 50.19160869 |
| MSR1    | 1.22314749  | 1.20E-08    | 3.64E-07    | 558.0665026 | 514.2519784 | 800.9943545 | 1195.437351 |
| CRTAM   | 1.222853561 | 0.003554627 | 0.019103941 | 7.91494219  | 8.349110899 | 16.33714343 | 13.75358258 |

|           |             |             |             |             |             |             |             |
|-----------|-------------|-------------|-------------|-------------|-------------|-------------|-------------|
| NXT2      | 1.22203856  | 0.002144502 | 0.012626402 | 6.7395721   | 6.767340599 | 9.903458899 | 15.24229571 |
| KCTD12    | 1.22144893  | 5.70E-06    | 8.72E-05    | 206.8659195 | 187.7921638 | 276.9644421 | 457.6736594 |
| TNFSF12   | 1.218734364 | 3.54E-06    | 5.75E-05    | 46.38872316 | 29.17575318 | 72.09574267 | 67.63081963 |
| PTGER2    | 1.217757565 | 3.05E-06    | 5.05E-05    | 28.05294974 | 33.6574357  | 61.24678444 | 52.53101503 |
| NOD1      | 1.216530825 | 3.94E-05    | 0.000450401 | 21.86266727 | 14.85194435 | 36.26895039 | 31.47635792 |
| RALB      | 1.216193554 | 2.33E-11    | 1.31E-09    | 93.40352678 | 84.09833303 | 146.3984914 | 181.9781661 |
| SDHAF4    | 1.214869549 | 0.004450021 | 0.023017294 | 3.526893852 | 2.637162594 | 5.109733172 | 6.310016934 |
| TMEM9B    | 1.214320167 | 2.08E-08    | 5.82E-07    | 68.87747089 | 50.4417761  | 108.9948157 | 111.0870648 |
| CFD       | 1.213541229 | 0.000751401 | 0.005373375 | 71.93343312 | 31.63628476 | 110.2563225 | 80.03676237 |
| PSMB10    | 1.211918607 | 8.04E-05    | 0.000833791 | 216.4255963 | 126.6303789 | 356.6285947 | 273.0732314 |
| SP100     | 1.210895579 | 7.54E-08    | 1.87E-06    | 151.2317352 | 101.0584257 | 233.3163079 | 230.6803528 |
| ATF3      | 1.208254575 | 2.46E-05    | 0.000299338 | 69.19090291 | 109.9339146 | 160.5273673 | 168.2961836 |
| MIER3     | 1.206859286 | 0.004169606 | 0.021849967 | 4.780621949 | 5.449198683 | 7.75889739  | 11.05972073 |
| AZI2      | 1.20600197  | 9.56E-07    | 1.84E-05    | 38.23949053 | 27.94548739 | 53.48851781 | 68.19794844 |
| TTC39B    | 1.205431524 | 0.001820696 | 0.01102579  | 4.858979955 | 7.821854132 | 9.651157545 | 13.61180038 |
| DNAJA1    | 1.204198289 | 4.14E-08    | 1.08E-06    | 288.9067519 | 183.2226052 | 414.9102075 | 450.0883116 |
| SUB1      | 1.203652512 | 8.85E-11    | 4.42E-09    | 69.50433494 | 59.05363662 | 118.0145891 | 117.2545906 |
| ARHGEF3   | 1.2034034   | 0.000167403 | 0.001542649 | 12.69478056 | 9.930881199 | 16.58944478 | 25.0252677  |
| ARPC5     | 1.20063303  | 3.38E-12    | 2.22E-10    | 361.7796975 | 330.0636146 | 585.7812995 | 679.2792423 |
| BLNK      | 1.200470212 | 0.000234537 | 0.002045075 | 33.53801017 | 16.52159078 | 44.34259372 | 47.21418243 |
| C1GALT1C1 | 1.198379305 | 6.29E-06    | 9.49E-05    | 39.10142859 | 22.84867198 | 56.01153135 | 57.06804552 |
| SLC37A1   | 1.198368948 | 1.44E-05    | 0.00019147  | 16.37760684 | 14.76406823 | 28.69990977 | 28.07358506 |
| LPCAT2    | 1.196869408 | 5.25E-05    | 0.000578048 | 28.8365298  | 33.74531182 | 46.86560726 | 67.48903742 |
| UBE2Z     | 1.196690891 | 9.35E-13    | 7.33E-11    | 176.5413712 | 172.9410982 | 306.6729266 | 330.140568  |
| ZKSCAN4   | 1.196666513 | 0.000727151 | 0.00524676  | 34.32159023 | 14.23681146 | 44.15336771 | 44.37853837 |
| C15orf57  | 1.19497942  | 7.49E-07    | 1.48E-05    | 30.87383796 | 24.25469002 | 47.62251133 | 52.81457944 |
| KPNA1     | 1.194969295 | 1.57E-08    | 4.50E-07    | 46.38872316 | 44.02681877 | 70.45578387 | 94.49854705 |

|                 |             |             |             |             |             |             |             |
|-----------------|-------------|-------------|-------------|-------------|-------------|-------------|-------------|
| C5orf22         | 1.194803102 | 1.11E-05    | 0.000154423 | 19.90371711 | 14.14893533 | 28.5737591  | 33.53219986 |
| SPATA13         | 1.19291793  | 0.001068309 | 0.007163927 | 26.72086364 | 14.6761921  | 32.16905339 | 43.31517185 |
| PARP14          | 1.19221074  | 0.000708143 | 0.005135283 | 357.3916491 | 121.4456873 | 395.4199279 | 475.4673259 |
| SCO1            | 1.191983145 | 2.82E-06    | 4.73E-05    | 20.29550714 | 15.73070563 | 30.59216993 | 34.95002189 |
| PARP8           | 1.191915075 | 3.68E-05    | 0.000422769 | 24.52683947 | 20.03663589 | 37.78275852 | 43.24428075 |
| PTPA            | 1.191782524 | 1.44E-05    | 0.00019183  | 244.6344784 | 143.7662238 | 357.8270261 | 346.870868  |
| IMPA1           | 1.191451503 | 0.000414096 | 0.003297914 | 9.482102311 | 9.139996049 | 14.06643124 | 19.8502173  |
| CASP10          | 1.190445183 | 1.09E-06    | 2.07E-05    | 46.31036515 | 30.75752348 | 69.32042777 | 70.53735478 |
| SGF29           | 1.189137766 | 2.39E-05    | 0.000291979 | 27.34772769 | 18.8063701  | 45.85640185 | 37.64388374 |
| CCL7            | 1.18766742  | 6.87E-06    | 0.00010271  | 123.1012111 | 153.9598546 | 254.951149  | 246.1346129 |
| SMAD1           | 1.185632065 | 0.008943583 | 0.040119627 | 4.232115906 | 3.515923872 | 5.235883849 | 8.862096583 |
| TMEM50A         | 1.184628596 | 2.85E-09    | 1.02E-07    | 240.3247881 | 174.171364  | 360.1608136 | 388.9801822 |
| IQSEC2          | 1.184163345 | 7.88E-06    | 0.000115031 | 28.20966575 | 19.33362687 | 43.08108695 | 42.81893414 |
| FNDC3A          | 1.181893122 | 0.000156924 | 0.001459126 | 20.06043313 | 27.68185901 | 36.01664904 | 50.26249979 |
| MCUB            | 1.18003601  | 3.06E-09    | 1.08E-07    | 60.49316424 | 51.32053738 | 96.50589867 | 104.9904301 |
| TGFB1           | 1.177214597 | 1.11E-08    | 3.38E-07    | 485.428631  | 332.0847656 | 742.4604403 | 725.925587  |
| RNASEK-C17orf49 | 1.176665756 | 0.003656258 | 0.019571015 | 14.88880473 | 17.48822819 | 38.98118995 | 18.71595967 |
| FYTTD1          | 1.176550254 | 1.22E-05    | 0.000166982 | 41.7656008  | 29.35150543 | 55.12847661 | 73.01854333 |
| APOBEC3C        | 1.176169613 | 0.000875263 | 0.006052187 | 24.76191349 | 10.37026184 | 29.51988917 | 33.74487317 |
| GGPS1           | 1.175136991 | 1.08E-05    | 0.000151782 | 16.29924884 | 11.60052763 | 23.40158134 | 26.79754523 |
| MS4A6A          | 1.17256008  | 4.01E-05    | 0.0004574   | 84.47071409 | 42.5329246  | 115.7438769 | 111.7250847 |
| ICE2            | 1.170602475 | 0.000108586 | 0.001065986 | 8.855238263 | 10.37026184 | 17.66172554 | 16.66011773 |
| RAB43           | 1.170376432 | 4.55E-08    | 1.18E-06    | 36.12382436 | 39.89664077 | 64.08517468 | 71.95517681 |
| PSMB8           | 1.170184319 | 0.00032585  | 0.002700946 | 244.9479105 | 109.1430294 | 345.3381091 | 286.6134318 |
| GNGT2           | 1.169412381 | 0.002915421 | 0.016281905 | 9.482102311 | 7.470349621 | 16.90482147 | 13.32823597 |
| CMTR1           | 1.16807482  | 1.19E-06    | 2.23E-05    | 88.54533041 | 55.187087   | 123.6913696 | 133.2050884 |
| CCDC134         | 1.16790794  | 0.003353766 | 0.018194811 | 6.034350045 | 5.449198683 | 11.98494507 | 8.436749975 |



|          |             |             |             |             |             |             |             |
|----------|-------------|-------------|-------------|-------------|-------------|-------------|-------------|
| CYTH1    | 1.16779652  | 3.12E-13    | 2.71E-11    | 146.8436869 | 148.9509153 | 269.3954015 | 258.2569912 |
| PLAA     | 1.166363164 | 1.34E-06    | 2.47E-05    | 42.15739083 | 29.26362931 | 60.17450369 | 67.41814632 |
| CREM     | 1.166244889 | 2.24E-05    | 0.000276249 | 30.56040594 | 18.89424623 | 48.31634005 | 39.77061678 |
| DCP1A    | 1.165833087 | 7.28E-05    | 0.000769426 | 17.1611869  | 19.86088364 | 33.05210813 | 32.89417995 |
| RPS6KC1  | 1.164884445 | 1.49E-05    | 0.000197029 | 30.40368992 | 25.92433645 | 42.8287856  | 57.84784764 |
| MBNL1    | 1.164492963 | 9.84E-07    | 1.88E-05    | 98.41843917 | 83.48320014 | 137.378718  | 187.5785632 |
| SCPEP1   | 1.164339686 | 7.38E-07    | 1.46E-05    | 162.6720041 | 105.8037366 | 232.7486298 | 245.6383752 |
| REEP3    | 1.162306596 | 1.17E-06    | 2.20E-05    | 29.38503585 | 21.26690168 | 42.07188154 | 48.20665785 |
| RUFY3    | 1.158167915 | 9.24E-06    | 0.000131925 | 16.29924884 | 13.18229793 | 24.66308811 | 27.71912955 |
| NSL1     | 1.15800051  | 0.000130404 | 0.001247086 | 29.85518388 | 15.6428295  | 36.14279972 | 44.80388498 |
| TMEM179B | 1.157845413 | 1.44E-06    | 2.60E-05    | 79.22072769 | 55.27496313 | 125.7097804 | 112.5048868 |
| C5orf15  | 1.157155223 | 1.23E-07    | 2.91E-06    | 30.95219597 | 33.13017893 | 53.93004518 | 59.69101627 |
| UBE2D1   | 1.156950469 | 0.000116418 | 0.001129053 | 26.2507156  | 16.96097142 | 35.00744362 | 41.75556762 |
| FHL3     | 1.156364378 | 3.00E-06    | 4.99E-05    | 34.08651621 | 26.45159322 | 53.04699044 | 54.23240147 |
| EMB      | 1.153513111 | 2.98E-05    | 0.000351323 | 17.55297693 | 15.73070563 | 24.60001277 | 34.45378418 |
| ACTR10   | 1.152871936 | 1.92E-09    | 7.10E-08    | 34.87009627 | 38.57849885 | 66.10358551 | 63.51913575 |
| MIIP     | 1.151112147 | 7.65E-05    | 0.000800663 | 81.57146787 | 59.75664564 | 134.2880264 | 114.7025109 |
| CCR1     | 1.151051633 | 3.84E-09    | 1.33E-07    | 399.7833304 | 369.7836244 | 570.6432182 | 791.3580736 |
| PIK3AP1  | 1.150338843 | 3.46E-08    | 9.16E-07    | 257.6419074 | 198.249423  | 346.5365405 | 459.6586102 |
| RPF1     | 1.149471518 | 1.74E-07    | 3.96E-06    | 22.88132134 | 20.65176879 | 39.67501867 | 37.00586383 |
| TRAM1    | 1.148760106 | 2.48E-06    | 4.23E-05    | 98.18336515 | 87.87700653 | 141.1632383 | 187.5076721 |
| PRRG4    | 1.148149714 | 0.008924414 | 0.040095958 | 4.388831918 | 4.921941916 | 6.938917989 | 9.500116496 |
| UVRAG    | 1.147539282 | 5.21E-07    | 1.08E-05    | 39.57157663 | 29.70300995 | 57.9037915  | 64.22804676 |
| RB1      | 1.146698255 | 0.000191743 | 0.001729295 | 100.6124633 | 61.86567271 | 108.7425143 | 178.5045022 |
| ZBTB33   | 1.145017725 | 0.000439682 | 0.003454031 | 12.77313856 | 9.227872177 | 16.02176673 | 22.82764355 |
| LGALS9   | 1.143032781 | 8.35E-06    | 0.000120836 | 1163.068667 | 623.1305007 | 1585.966942 | 1546.986323 |
| CCDC50   | 1.140787758 | 1.14E-07    | 2.71E-06    | 22.09774128 | 22.5850436  | 39.86424469 | 38.35279476 |

|         |             |             |             |             |             |             |             |
|---------|-------------|-------------|-------------|-------------|-------------|-------------|-------------|
| UBE2A   | 1.140581818 | 1.31E-10    | 6.33E-09    | 78.90729566 | 70.56540936 | 121.9883354 | 140.2233074 |
| NEK3    | 1.139164582 | 0.00017933  | 0.001633783 | 11.67612648 | 10.63389022 | 21.44624585 | 17.51081095 |
| ST8SIA4 | 1.136676861 | 5.44E-07    | 1.11E-05    | 75.38118539 | 54.92345861 | 107.1025555 | 120.8700368 |
| ARHGAP5 | 1.135749861 | 0.001717219 | 0.010500502 | 9.482102311 | 7.646101877 | 12.04802041 | 18.00704866 |
| VAV2    | 1.134074971 | 0.001147339 | 0.007605534 | 9.090312281 | 6.064331577 | 12.74184913 | 13.75358258 |
| TLK2    | 1.132860456 | 2.80E-07    | 6.12E-06    | 33.14622014 | 30.84539961 | 49.3886208  | 62.38487812 |
| HEIH    | 1.13227722  | 6.93E-07    | 1.38E-05    | 80.08266575 | 57.55974245 | 125.2051777 | 114.3480554 |
| SQOR    | 1.132010171 | 2.74E-08    | 7.47E-07    | 347.6752564 | 281.468116  | 563.7680063 | 530.9750582 |
| FCGR1CP | 1.129983612 | 8.95E-06    | 0.000128408 | 15.35895276 | 13.70955469 | 25.86151954 | 24.67081219 |
| PILRA   | 1.129410681 | 3.52E-09    | 1.23E-07    | 335.7648395 | 266.0897936 | 550.7114113 | 494.1825766 |
| FECH    | 1.127490744 | 1.87E-05    | 0.000238267 | 27.73951772 | 19.24575074 | 35.70127235 | 46.15081591 |
| B2M     | 1.127275744 | 1.20E-07    | 2.86E-06    | 6559.976333 | 4281.237947 | 9569.475612 | 9236.473199 |
| MRPL1   | 1.127236385 | 0.000427656 | 0.003376126 | 10.6574724  | 6.855216727 | 14.12950658 | 16.37655333 |
| ZNF800  | 1.125074906 | 0.006644394 | 0.031711674 | 4.858979955 | 6.32795996  | 8.831178144 | 10.56348302 |
| ZNF124  | 1.124917477 | 0.000743835 | 0.005332484 | 8.541806238 | 6.415836088 | 11.35419168 | 14.6751669  |
| SGMS1   | 1.123233775 | 2.22E-06    | 3.82E-05    | 39.33650261 | 30.58177122 | 55.75922999 | 65.50408658 |
| ERBIN   | 1.122505084 | 0.000169441 | 0.001557457 | 36.43725639 | 44.46619941 | 53.99312052 | 86.55874369 |
| ADAR    | 1.120054797 | 2.81E-05    | 0.000335412 | 414.5929935 | 211.2550899 | 500.8188185 | 581.5204135 |
| ST6GAL1 | 1.119869494 | 0.000439923 | 0.003454041 | 16.45596485 | 8.70061541  | 19.04938298 | 24.59992109 |
| NADK    | 1.118862789 | 1.16E-08    | 3.52E-07    | 323.4626325 | 258.796075  | 525.4812759 | 478.1611877 |
| RABAC1  | 1.118086339 | 0.000510998 | 0.003926629 | 138.9295283 | 89.28302457 | 232.0548011 | 160.0728158 |
| GRIN2D  | 1.117168444 | 0.008841334 | 0.039759829 | 11.51941047 | 4.658313533 | 14.25565726 | 13.68269148 |
| RAD9A   | 1.11626847  | 0.000234263 | 0.00204392  | 21.54923524 | 15.73070563 | 35.25974498 | 28.85338717 |
| COQ10B  | 1.115787005 | 1.11E-06    | 2.09E-05    | 26.1723576  | 25.30920356 | 40.11654604 | 48.70289556 |
| RILP    | 1.115475276 | 8.91E-05    | 0.000900732 | 42.78425488 | 31.63628476 | 73.10494808 | 54.65774807 |
| FAM208B | 1.115263612 | 0.003244383 | 0.017775025 | 9.168670287 | 9.227872177 | 13.87720522 | 17.86526646 |
| ZC3H12C | 1.114404101 | 0.008241714 | 0.037638028 | 8.071658202 | 15.20344886 | 14.94948598 | 25.237941   |

|           |             |             |             |             |             |             |             |
|-----------|-------------|-------------|-------------|-------------|-------------|-------------|-------------|
| PSMA2     | 1.114008492 | 1.69E-06    | 3.00E-05    | 120.8288289 | 84.88921818 | 177.6838593 | 176.0942047 |
| LIN7C     | 1.113863476 | 0.000616112 | 0.004566573 | 14.18358267 | 9.667252815 | 15.9586914  | 25.3088321  |
| IGF1      | 1.113705252 | 0.005516009 | 0.027363878 | 28.44473977 | 11.68840375 | 22.64467728 | 46.93061802 |
| HTATSF1P2 | 1.113156604 | 0.005921352 | 0.029035348 | 3.918683882 | 5.53707481  | 8.263500098 | 7.940512265 |
| PLEKHF2   | 1.111652881 | 6.52E-05    | 0.000699668 | 18.414915   | 19.24575074 | 29.45681384 | 35.3044774  |
| BPGM      | 1.111473676 | 3.29E-05    | 0.000383064 | 14.73208872 | 16.17008627 | 23.65388269 | 29.49140708 |
| ABI1      | 1.111362672 | 5.94E-09    | 1.97E-07    | 98.65351318 | 101.4099302 | 158.5720318 | 185.3100479 |
| ZNF107    | 1.110002573 | 0.00857342  | 0.038833343 | 12.69478056 | 6.943092855 | 14.06643124 | 19.7793262  |
| COA6      | 1.109424476 | 7.16E-05    | 0.000758134 | 36.43725639 | 21.17902555 | 51.28088096 | 47.49774683 |
| LY96      | 1.10857344  | 1.14E-05    | 0.000157746 | 53.20586968 | 36.99672855 | 78.27712584 | 76.27953399 |
| C3AR1     | 1.107803479 | 1.99E-12    | 1.41E-10    | 290.94406   | 299.6584744 | 495.2681887 | 516.2297091 |
| RBM34     | 1.107161629 | 0.000203377 | 0.00181505  | 36.51561439 | 18.98212236 | 46.36100456 | 48.77378666 |
| CMC2      | 1.105372718 | 2.40E-05    | 0.000293769 | 31.10891198 | 22.05778683 | 45.16257312 | 45.7963604  |
| ARL8A     | 1.104601259 | 2.43E-10    | 1.12E-08    | 126.7840374 | 121.5335635 | 197.931043  | 226.8522333 |
| CISD1     | 1.10370637  | 0.00016118  | 0.001490063 | 12.69478056 | 8.436987027 | 16.71559546 | 19.49576179 |
| CCDC85B   | 1.103423024 | 0.006276158 | 0.030433883 | 59.47451016 | 25.22132743 | 91.39679625 | 52.46012393 |
| RAB2B     | 1.103131478 | 0.000148462 | 0.001390439 | 16.37760684 | 11.24902312 | 20.68934178 | 26.65576303 |
| STYX      | 1.10271473  | 0.000420079 | 0.003330855 | 20.29550714 | 13.35805018 | 23.40158134 | 34.31200198 |
| ANKIB1    | 1.102105058 | 0.000457898 | 0.003573781 | 19.35521107 | 14.0610592  | 23.78003337 | 33.46130876 |
| ZCCHC10   | 1.101535725 | 0.002616275 | 0.014905432 | 13.40000261 | 7.90973026  | 17.2832735  | 19.14130628 |
| PSMF1     | 1.100754831 | 1.00E-10    | 4.96E-09    | 123.0228531 | 109.3187817 | 195.8495568 | 200.1262881 |
| NOD2      | 1.099211071 | 8.42E-07    | 1.64E-05    | 30.16861591 | 29.43938156 | 49.26247013 | 52.24745063 |
| N4BP1     | 1.09890076  | 1.28E-07    | 3.00E-06    | 97.32142708 | 87.1739975  | 141.478615  | 173.1167785 |
| TINF2     | 1.097744596 | 6.81E-09    | 2.22E-07    | 81.25803584 | 67.66549714 | 124.1328969 | 129.2351867 |
| GNA13     | 1.097247236 | 5.07E-06    | 7.88E-05    | 86.50802225 | 84.97709431 | 122.6821641 | 169.7140056 |
| YEATS2    | 1.096090786 | 3.72E-07    | 7.95E-06    | 59.31779415 | 53.51744057 | 90.76604286 | 101.0914195 |
| RPAP3     | 1.095586624 | 0.001110898 | 0.007401368 | 14.4970147  | 8.436987027 | 18.35555426 | 20.70091051 |

|              |             |             |             |             |             |             |             |
|--------------|-------------|-------------|-------------|-------------|-------------|-------------|-------------|
| NOC3L        | 1.094727171 | 0.003985869 | 0.021038797 | 4.702263942 | 4.746189661 | 7.001993328 | 9.074769887 |
| LOC100419583 | 1.09416036  | 0.000372357 | 0.003018029 | 70.67970503 | 32.60292216 | 86.16154315 | 89.18171444 |
| TMEM219      | 1.093227616 | 0.000115352 | 0.001120223 | 204.4368213 | 127.8606447 | 310.7728236 | 251.3096633 |
| IL10RA       | 1.091315012 | 3.80E-11    | 2.01E-09    | 352.0633047 | 307.0400692 | 544.7823294 | 571.382986  |
| BTK          | 1.089913038 | 2.80E-08    | 7.59E-07    | 99.12366122 | 77.33187119 | 137.0633413 | 161.9159845 |
| ETNK1        | 1.085764394 | 8.20E-06    | 0.000119056 | 39.57157663 | 37.61186144 | 56.70536007 | 73.79834545 |
| SDS          | 1.085630276 | 1.08E-05    | 0.000151782 | 200.675637  | 121.5335635 | 276.5859901 | 266.5512501 |
| MCL1         | 1.08560561  | 2.41E-10    | 1.11E-08    | 324.0894966 | 297.8130758 | 472.8133682 | 577.7631851 |
| HIVEP3       | 1.082579048 | 0.000114715 | 0.001114783 | 15.59402678 | 12.21566052 | 22.96005397 | 23.89101008 |
| RCN1         | 1.082432292 | 1.48E-06    | 2.67E-05    | 33.06786213 | 24.95769905 | 45.79332651 | 52.03477732 |
| POMP         | 1.081724835 | 1.35E-06    | 2.47E-05    | 121.2206189 | 90.952671   | 175.6654485 | 181.2692551 |
| RNF213       | 1.079400234 | 2.30E-05    | 0.000282128 | 579.0664482 | 315.1246729 | 679.7635538 | 824.2515446 |
| SSR1         | 1.078353361 | 1.65E-08    | 4.71E-07    | 115.5788425 | 88.66789168 | 160.2119906 | 182.9706416 |
| PLCL2        | 1.078101565 | 0.00081379  | 0.005703647 | 9.403744305 | 8.788491538 | 15.138712   | 15.38407791 |
| CD37         | 1.077660738 | 4.36E-08    | 1.13E-06    | 235.7800238 | 186.561898  | 383.3725382 | 323.6185867 |
| SERPINB1     | 1.077610688 | 2.94E-09    | 1.05E-07    | 153.5041174 | 125.1364847 | 228.1441301 | 239.3290672 |
| LENG1        | 1.076727313 | 0.000640085 | 0.00470559  | 16.69103887 | 14.93982048 | 28.19530707 | 24.74170329 |
| MZT1         | 1.076667516 | 0.001399727 | 0.008941772 | 6.112708051 | 4.39468515  | 8.515801452 | 9.145660989 |
| IFRD1        | 1.076433393 | 1.83E-05    | 0.00023452  | 22.2544573  | 22.14566296 | 40.68422409 | 33.53219986 |
| CITED2       | 1.076386627 | 3.52E-07    | 7.57E-06    | 52.03049959 | 69.24726744 | 97.51510409 | 105.6993411 |
| SETX         | 1.074497096 | 1.25E-06    | 2.33E-05    | 82.27668992 | 67.92912552 | 116.9423083 | 134.7646926 |
| GIMAP8       | 1.073768651 | 0.005233618 | 0.026224426 | 51.63870956 | 20.65176879 | 52.66853841 | 68.62329505 |
| KDM6A        | 1.073015183 | 0.002506404 | 0.014433328 | 10.34404038 | 17.31247593 | 21.88777322 | 24.31635668 |
| RNASEH2B     | 1.071109985 | 4.36E-06    | 6.85E-05    | 26.1723576  | 21.09114942 | 38.09813521 | 40.90487441 |
| TREX1        | 1.070494657 | 0.003483591 | 0.0187651   | 144.7280207 | 55.62646764 | 190.4250777 | 142.9880604 |
| CTSO         | 1.069846697 | 0.000361903 | 0.002947302 | 21.0790872  | 17.04884755 | 28.32145774 | 35.4462596  |
| NUDT3        | 1.06878605  | 2.86E-05    | 0.000339344 | 45.21335307 | 30.93327573 | 62.57136655 | 64.44072006 |

|          |             |             |             |             |             |             |             |
|----------|-------------|-------------|-------------|-------------|-------------|-------------|-------------|
| ZNF518B  | 1.06712726  | 0.002039448 | 0.012091732 | 8.228374214 | 7.821854132 | 12.23724642 | 14.53338469 |
| RRAGC    | 1.067014351 | 2.33E-09    | 8.49E-08    | 81.9632579  | 78.03488022 | 121.6729587 | 145.1147934 |
| ANKMY2   | 1.066797948 | 0.000560933 | 0.004226001 | 10.97090443 | 7.733978005 | 13.68797921 | 17.58170205 |
| TBK1     | 1.065366145 | 0.000124037 | 0.00119504  | 36.04546636 | 30.58177122 | 46.99175794 | 64.15715566 |
| METTL14  | 1.065338658 | 0.001000139 | 0.006792006 | 20.06043313 | 11.16114699 | 25.35691683 | 26.65576303 |
| TMEM19   | 1.063763612 | 6.18E-06    | 9.35E-05    | 23.42982739 | 23.99106164 | 34.50284092 | 44.44942948 |
| OTUD4    | 1.063671445 | 0.000283037 | 0.002402653 | 18.88506304 | 20.30026427 | 30.40294391 | 34.73734859 |
| DIP2B    | 1.062099867 | 0.000382517 | 0.003085577 | 59.00436213 | 30.31814284 | 63.76979798 | 84.92824836 |
| RGL1     | 1.062071289 | 1.62E-09    | 6.10E-08    | 328.1641129 | 299.3069699 | 461.0813552 | 582.0875423 |
| PCMT1    | 1.061010114 | 5.59E-08    | 1.42E-06    | 106.8811038 | 84.53771367 | 157.121299  | 160.2854891 |
| H1FO     | 1.060300802 | 0.000168709 | 0.001551954 | 320.7984603 | 152.9053411 | 401.601311  | 382.8835475 |
| CCNYL1   | 1.060297626 | 3.32E-06    | 5.43E-05    | 38.70963856 | 34.71194923 | 50.77627825 | 71.3171569  |
| DNASE2   | 1.056568388 | 2.54E-07    | 5.62E-06    | 88.78040442 | 83.0438195  | 152.2644979 | 131.2201376 |
| OSCAR    | 1.054612092 | 0.000103876 | 0.001026034 | 64.64613856 | 113.7125881 | 158.5089564 | 135.1900392 |
| PNRC2    | 1.053110149 | 1.15E-06    | 2.17E-05    | 101.2393274 | 86.2073601  | 144.0647039 | 165.3896484 |
| NAPRT    | 1.049722394 | 1.77E-05    | 0.000228105 | 45.21335307 | 51.49628963 | 90.19836482 | 68.33973064 |
| SLC25A24 | 1.049544118 | 0.001495526 | 0.009403895 | 38.39620654 | 38.93000336 | 49.32554547 | 78.40626704 |
| GCA      | 1.048791002 | 0.001215731 | 0.007967403 | 38.39620654 | 19.50937913 | 38.98118995 | 56.64269891 |
| MRPL42   | 1.048717798 | 0.000357788 | 0.00292204  | 15.12387875 | 9.930881199 | 18.04017757 | 23.32388126 |
| AES      | 1.048637661 | 1.14E-05    | 0.00015765  | 353.7871809 | 230.6757141 | 529.1396455 | 429.38811   |
| FKBP5    | 1.048141712 | 0.000435765 | 0.003426986 | 28.36638177 | 21.79415845 | 35.1335943  | 47.56863794 |
| SUCO     | 1.04798785  | 0.006074021 | 0.029632925 | 7.366436148 | 8.085482516 | 11.79571905 | 13.61180038 |
| SGTB     | 1.047566114 | 0.000693798 | 0.005043928 | 76.32148146 | 49.73876708 | 84.90003638 | 122.9258787 |
| PTGIR    | 1.047201487 | 0.00102816  | 0.006946334 | 29.85518388 | 16.87309529 | 39.86424469 | 36.86408163 |
| TOX4     | 1.046338137 | 1.59E-08    | 4.56E-07    | 73.26551923 | 62.4808056  | 106.9133295 | 116.0494419 |
| AGPAT5   | 1.045242537 | 0.000292199 | 0.002467367 | 15.75074279 | 11.42477537 | 20.31088975 | 24.38724779 |
| RHOB     | 1.044932141 | 2.01E-06    | 3.50E-05    | 96.77292104 | 73.11381706 | 138.0725467 | 140.5068718 |

|         |             |             |             |             |             |             |             |
|---------|-------------|-------------|-------------|-------------|-------------|-------------|-------------|
| FEM1C   | 1.044590027 | 0.000581048 | 0.004349119 | 14.88880473 | 16.69734304 | 23.21235532 | 28.64071387 |
| EBAG9   | 1.043694923 | 0.002062582 | 0.012198821 | 16.14253282 | 10.19450958 | 20.75241712 | 22.47318805 |
| MSMO1   | 1.043615764 | 7.31E-06    | 0.000108122 | 37.53426847 | 24.69407066 | 47.30713463 | 54.87042138 |
| PECAM1  | 1.043002573 | 7.11E-06    | 0.000105546 | 149.5078591 | 97.54338058 | 199.3817758 | 205.2304474 |
| TRAF5   | 1.042249323 | 0.001100883 | 0.007344818 | 9.795534335 | 11.16114699 | 16.02176673 | 18.29061307 |
| FNIP2   | 1.042091163 | 0.00069253  | 0.005037249 | 43.33276092 | 72.32293191 | 71.6542153  | 118.3888482 |
| USPL1   | 1.04177813  | 0.000982231 | 0.006697811 | 19.12013705 | 15.20344886 | 25.10461548 | 31.19279352 |
| ITGAL   | 1.040671149 | 0.000491033 | 0.003795447 | 60.72823826 | 33.0423028  | 88.74763203 | 64.08626456 |
| CYB561  | 1.040525007 | 0.000168735 | 0.001551954 | 20.53058116 | 19.50937913 | 34.37669024 | 30.98012021 |
| NOC4L   | 1.038386406 | 8.34E-05    | 0.000858466 | 20.45222316 | 19.421503   | 36.45817641 | 28.42804056 |
| ESCO1   | 1.038091287 | 0.002526159 | 0.014523904 | 7.758226178 | 6.503712216 | 9.02040416  | 14.39160249 |
| TANK    | 1.036473492 | 9.00E-05    | 0.000909087 | 36.12382436 | 45.34496069 | 57.9037915  | 75.14527637 |
| RDH14   | 1.036277948 | 0.000311444 | 0.002597943 | 9.952250347 | 10.45813797 | 14.8233353  | 18.50328637 |
| MRPL32  | 1.034939178 | 1.09E-05    | 0.000152243 | 24.37012346 | 20.03663589 | 34.81821761 | 37.57299264 |
| PFKP    | 1.03492972  | 1.37E-06    | 2.50E-05    | 64.56778056 | 93.85258321 | 128.2958693 | 129.44786   |
| STK17A  | 1.034763907 | 0.000122715 | 0.001184546 | 18.10148298 | 13.88530695 | 26.42919759 | 25.66328761 |
| RIF1    | 1.03413891  | 0.007650319 | 0.035368276 | 11.12762044 | 12.12778439 | 14.0033559  | 24.03279228 |
| ZNF496  | 1.033937166 | 3.07E-05    | 0.00036111  | 34.94845427 | 24.95769905 | 46.23485388 | 51.39675741 |
| ANKFY1  | 1.033130356 | 3.25E-06    | 5.32E-05    | 134.854912  | 87.87700653 | 175.9808252 | 186.4443055 |
| GOLT1B  | 1.02955092  | 1.30E-06    | 2.40E-05    | 21.86266727 | 24.25469002 | 34.94436829 | 39.91239899 |
| NDUFC2  | 1.02815086  | 1.83E-05    | 0.000234499 | 68.48568086 | 49.29938644 | 97.45202875 | 93.36428943 |
| RNF19A  | 1.027716025 | 0.00024623  | 0.002121397 | 27.03429566 | 28.47274416 | 38.4135119  | 51.75121292 |
| LILRB1  | 1.025019582 | 1.57E-05    | 0.00020633  | 163.1421522 | 119.6002886 | 220.0074115 | 237.4858985 |
| SH3GLB1 | 1.024366128 | 5.36E-09    | 1.81E-07    | 108.60498   | 115.6458629 | 170.4932707 | 192.2573758 |
| NT5C2   | 1.024245702 | 1.39E-06    | 2.52E-05    | 80.31773977 | 65.99585071 | 103.3811106 | 133.7013261 |
| PROCR   | 1.022983116 | 2.25E-05    | 0.000276785 | 14.81044672 | 14.41256371 | 22.96005397 | 24.24546558 |
| ZNF101  | 1.022920686 | 0.003280651 | 0.017901329 | 10.97090443 | 7.90973026  | 12.42647244 | 18.21972197 |

|           |             |             |             |             |             |             |             |
|-----------|-------------|-------------|-------------|-------------|-------------|-------------|-------------|
| C8orf59   | 1.022236468 | 0.000615207 | 0.00456233  | 16.37760684 | 10.28238571 | 21.13086915 | 21.97695034 |
| COX17     | 1.021915222 | 1.46E-05    | 0.000193319 | 29.93354189 | 27.41823062 | 50.65012757 | 41.68467652 |
| MFSD14B   | 1.019216715 | 7.82E-06    | 0.000114399 | 59.70958418 | 50.09027159 | 74.55568087 | 102.863697  |
| INTS12    | 1.018748066 | 7.37E-05    | 0.000776553 | 19.27685307 | 17.8397327  | 28.88913579 | 30.90922911 |
| ADPRHL2   | 1.018233707 | 4.72E-05    | 0.000525442 | 80.08266575 | 51.93567027 | 107.6071582 | 104.8486478 |
| IKZF5     | 1.017555881 | 0.002058054 | 0.012182026 | 9.247028293 | 9.139996049 | 13.94028056 | 15.66764232 |
| ARMCX1    | 1.016998791 | 7.44E-05    | 0.000781616 | 19.82535911 | 24.1668139  | 32.98903279 | 37.78566595 |
| ATXN7     | 1.016831409 | 0.003281063 | 0.017901329 | 15.12387875 | 13.00654567 | 18.54478027 | 26.86843633 |
| HEBP2     | 1.016214232 | 7.96E-05    | 0.000827273 | 18.57163101 | 26.80309773 | 36.64740243 | 36.15517061 |
| CUL4B     | 1.016172802 | 5.26E-05    | 0.000578048 | 24.76191349 | 18.10336108 | 30.2137179  | 38.91992357 |
| TMED7     | 1.015961216 | 0.000919198 | 0.006313636 | 25.31041953 | 28.38486803 | 34.56591626 | 52.03477732 |
| SMARCA5   | 1.01475056  | 4.90E-05    | 0.000543538 | 63.39241047 | 51.93567027 | 77.33099576 | 108.464094  |
| FUOM      | 1.0139262   | 2.00E-05    | 0.000250915 | 47.40737723 | 37.08460468 | 68.43737303 | 67.13458192 |
| ZNF22     | 1.013836909 | 0.000447125 | 0.003499163 | 16.14253282 | 13.62167856 | 20.62626645 | 27.29378294 |
| SIAH2     | 1.013185743 | 2.43E-05    | 0.000297158 | 24.68355548 | 21.53053006 | 34.88129295 | 39.34527018 |
| ARID4B    | 1.012506054 | 0.003289091 | 0.017938349 | 16.76939687 | 16.34583853 | 20.37396509 | 32.96507105 |
| CERS6     | 1.012182972 | 4.58E-05    | 0.000512149 | 36.28054038 | 30.58177122 | 46.23485388 | 61.2506205  |
| RAB9A     | 1.011470715 | 5.55E-06    | 8.52E-05    | 68.72075488 | 49.29938644 | 92.21677565 | 96.9797356  |
| IDI1      | 1.011345113 | 4.30E-07    | 9.01E-06    | 51.56035155 | 51.84779414 | 86.91844722 | 78.47715814 |
| KLF4      | 1.010645685 | 0.000656249 | 0.004799961 | 20.84401319 | 29.70300995 | 46.67638125 | 33.88665537 |
| MFSD12    | 1.010615482 | 6.08E-08    | 1.53E-06    | 246.9068606 | 232.5211128 | 410.4949338 | 355.7322556 |
| LINC00998 | 1.01010899  | 1.89E-05    | 0.000240726 | 26.32907361 | 22.05778683 | 36.64740243 | 40.90487441 |
| MESDC1    | 1.009878885 | 2.24E-07    | 4.99E-06    | 54.30288177 | 53.95682121 | 85.59386511 | 87.62211021 |
| PRKAA1    | 1.009274626 | 0.000749108 | 0.005362289 | 22.41117331 | 16.2579624  | 24.72616345 | 37.43121044 |
| GART      | 1.008956888 | 3.85E-07    | 8.20E-06    | 33.53801017 | 34.88770148 | 51.72240833 | 57.77695653 |
| PPP2R3C   | 1.008548463 | 6.52E-06    | 9.79E-05    | 29.54175186 | 35.85433889 | 51.65933299 | 52.81457944 |
| GPATCH1   | 1.00839133  | 0.007235537 | 0.033889909 | 6.896288112 | 5.361322555 | 10.02960958 | 9.571007597 |

|                  |              |             |             |             |             |             |             |
|------------------|--------------|-------------|-------------|-------------|-------------|-------------|-------------|
| CASP8            | 1.006923843  | 0.000801305 | 0.005640794 | 30.0902579  | 18.63061785 | 34.3136149  | 43.74051846 |
| ELMO1            | 1.006254967  | 2.48E-07    | 5.52E-06    | 40.27679868 | 39.19363174 | 60.17450369 | 66.78012641 |
| CALM1            | 1.004559306  | 1.66E-09    | 6.23E-08    | 402.8392926 | 339.9936171 | 552.6036714 | 632.9873531 |
| PAIP1            | 1.004440822  | 1.79E-05    | 0.000229474 | 48.19095729 | 33.74531182 | 60.55295572 | 70.32468148 |
| PRKRIP1          | 1.002181192  | 0.000384172 | 0.003097202 | 19.6686431  | 20.47601653 | 32.23212873 | 31.61814013 |
| LRP10            | 1.001498147  | 1.05E-08    | 3.20E-07    | 253.4889331 | 256.7749241 | 410.6210844 | 400.6772139 |
| MEMO1            | 1.000618979  | 1.12E-06    | 2.11E-05    | 32.44099808 | 29.96663833 | 45.79332651 | 53.59438155 |
| TLR1             | 1.000563584  | 3.03E-06    | 5.03E-05    | 50.77677149 | 57.82337083 | 85.53078977 | 87.0549814  |
| RPS18            | -1.000103209 | 1.62E-05    | 0.00021214  | 599.0477398 | 653.1841364 | 273.5583739 | 222.7405494 |
| PDXDC2P-NPIPB14P | -1.00035046  | 0.009867119 | 0.043465322 | 9.403744305 | 15.29132499 | 5.235883849 | 4.537739399 |
| SLC35E1          | -1.000579593 | 4.31E-05    | 0.000487297 | 33.77308418 | 44.81770392 | 13.56182853 | 17.72348426 |
| SDHAP1           | -1.002393767 | 0.000242865 | 0.002099929 | 25.15370352 | 26.36371709 | 9.272705514 | 11.20150293 |
| IPO4             | -1.005295744 | 0.000241075 | 0.00209052  | 19.43356908 | 19.94875976 | 8.452726113 | 7.089819049 |
| CEP131           | -1.006188494 | 0.009324584 | 0.041467817 | 14.41865669 | 16.60946691 | 7.380445359 | 4.821303805 |
| SLC36A1          | -1.007317255 | 7.67E-05    | 0.000801682 | 142.1422065 | 235.6846534 | 64.96822942 | 84.71557506 |
| TP53BP1          | -1.010322395 | 0.000776638 | 0.005523739 | 15.28059476 | 19.59725525 | 5.992787912 | 7.798730063 |
| SPRY2            | -1.011070454 | 0.001375966 | 0.008830838 | 11.12762044 | 15.02769661 | 4.920507157 | 5.388432616 |
| UNG              | -1.01148915  | 0.002461071 | 0.014217662 | 9.795534335 | 9.403624432 | 3.406699033 | 4.183283892 |
| TTLL12           | -1.011531309 | 0.000561085 | 0.004226001 | 33.30293615 | 62.65655786 | 18.04017757 | 19.7793262  |
| FAM193B          | -1.011871392 | 0.000220143 | 0.001934769 | 49.28796938 | 45.16920843 | 21.95084855 | 15.1005135  |
| NFKBIA           | -1.011952545 | 0.005376337 | 0.026781469 | 296.1940464 | 883.4195912 | 267.9446687 | 195.2348021 |
| WDR19            | -1.013782401 | 0.008423507 | 0.038298559 | 9.717176329 | 11.68840375 | 4.163603095 | 4.254174994 |
| CARD19           | -1.014722953 | 4.42E-05    | 0.000496859 | 123.2579271 | 155.7173772 | 60.3637297  | 49.05735106 |
| SIGLEC9          | -1.015656732 | 5.97E-07    | 1.21E-05    | 95.51919294 | 76.80461443 | 33.43056016 | 34.31200198 |
| SETD7            | -1.0220496   | 0.000862581 | 0.005978821 | 24.84027149 | 41.03903043 | 11.29111635 | 14.53338469 |
| NBPF8            | -1.023130269 | 9.43E-05    | 0.000946029 | 37.22083645 | 50.4417761  | 17.15712283 | 17.08546434 |
| FBXL20           | -1.023332302 | 0.000535739 | 0.004091209 | 20.76565518 | 25.66070807 | 7.443520697 | 10.77615632 |



|           |              |             |             |             |             |             |             |
|-----------|--------------|-------------|-------------|-------------|-------------|-------------|-------------|
| SGSM2     | -1.023479323 | 5.35E-05    | 0.000584933 | 56.49690594 | 89.98603359 | 29.51988917 | 27.64823845 |
| ACTN1     | -1.023977443 | 0.001065632 | 0.007149293 | 73.57895125 | 168.8109202 | 42.19803221 | 52.67279724 |
| LOC148413 | -1.024559993 | 0.001793495 | 0.010887049 | 18.57163101 | 23.02442424 | 8.957328821 | 7.231601252 |
| MEGF8     | -1.025087532 | 1.63E-05    | 0.00021333  | 28.8365298  | 33.74531182 | 11.48034236 | 12.97378046 |
| PHC2      | -1.025139138 | 3.87E-06    | 6.21E-05    | 177.8734573 | 251.7659848 | 85.02618706 | 82.58884202 |
| GBE1      | -1.025157506 | 0.001613107 | 0.009986592 | 21.23580322 | 44.20257103 | 9.777308222 | 15.88031562 |
| AK1       | -1.027056625 | 0.000791296 | 0.005590514 | 9.011954275 | 9.667252815 | 3.659000387 | 3.616155081 |
| MAST2     | -1.028459383 | 0.000306364 | 0.002564468 | 31.50070201 | 49.65089095 | 13.87720522 | 17.79437536 |
| IMPA2     | -1.02921658  | 0.000747413 | 0.005352815 | 27.89623373 | 29.8787622  | 12.42647244 | 9.996354205 |
| TM6SF1    | -1.030202569 | 0.000733984 | 0.005277588 | 17.31790291 | 29.17575318 | 7.506596036 | 10.63437412 |
| HADH      | -1.030295151 | 0.001699657 | 0.010428467 | 22.17609929 | 13.00654567 | 7.632746713 | 6.026452528 |
| PLXNA3    | -1.030387541 | 0.000779908 | 0.005541533 | 30.16861591 | 56.24160053 | 17.72480087 | 15.80942452 |
| BHLHE40   | -1.031425456 | 0.003026139 | 0.016835086 | 27.11265367 | 66.78673586 | 20.75241712 | 15.59675121 |
| FCGR2C    | -1.033404844 | 5.02E-05    | 0.000555116 | 66.05658267 | 44.37832328 | 21.13086915 | 21.76427703 |
| C3        | -1.034788097 | 0.001565968 | 0.009757551 | 53.91109174 | 128.9151582 | 38.60273792 | 32.11437784 |
| SRSF8     | -1.034802293 | 0.00037573  | 0.003041028 | 15.28059476 | 17.92760883 | 6.749691974 | 6.09734363  |
| MKKS      | -1.036469467 | 1.93E-05    | 0.000244567 | 33.61636817 | 46.75097873 | 15.70639004 | 15.38407791 |
| SNX30     | -1.036471469 | 0.001159445 | 0.007661147 | 30.79547995 | 54.13257346 | 13.37260252 | 19.63754399 |
| CNTROB    | -1.037184349 | 1.22E-05    | 0.0001661   | 36.20218237 | 39.28150787 | 14.06643124 | 15.17140461 |
| RAB27A    | -1.038413898 | 0.001073386 | 0.007190476 | 12.14627452 | 16.78521916 | 5.172808511 | 6.026452528 |
| MZT2A     | -1.040334203 | 0.003315905 | 0.018041997 | 27.03429566 | 28.73637254 | 13.94028056 | 7.444274556 |
| PDPR      | -1.041613376 | 1.86E-05    | 0.000237396 | 40.04172467 | 49.29938644 | 16.08484207 | 18.43239527 |
| ARHGAP19  | -1.043320724 | 0.00098743  | 0.006724679 | 14.88880473 | 19.86088364 | 6.245089266 | 7.16071015  |
| BRD8      | -1.044908134 | 0.00019826  | 0.001779289 | 30.01189989 | 43.93894264 | 15.01256132 | 13.39912707 |
| ADAM28    | -1.045287813 | 0.000727975 | 0.005250078 | 37.22083645 | 74.60771123 | 21.19394449 | 21.83516814 |
| HMGB2     | -1.045369352 | 5.69E-05    | 0.000615034 | 45.76185911 | 45.16920843 | 18.22940358 | 16.73100884 |
| CCDC57    | -1.045544732 | 0.003270884 | 0.017874183 | 15.98581681 | 20.03663589 | 8.389650775 | 5.388432616 |

|         |              |             |             |             |             |             |             |
|---------|--------------|-------------|-------------|-------------|-------------|-------------|-------------|
| CROCCP2 | -1.047272985 | 0.002437343 | 0.014114484 | 17.55297693 | 12.65504116 | 5.740486558 | 5.884670325 |
| CKAP2   | -1.049457438 | 0.004169829 | 0.021849967 | 14.65373071 | 12.56716503 | 4.668205803 | 5.813779224 |
| TBC1D14 | -1.049716942 | 1.63E-06    | 2.90E-05    | 112.9146703 | 159.8475552 | 49.26247013 | 55.50844129 |
| ARRB1   | -1.049726107 | 5.65E-07    | 1.15E-05    | 170.8995948 | 244.7358946 | 83.57545428 | 75.71240518 |
| SUMF1   | -1.049760478 | 1.39E-05    | 0.000186545 | 42.78425488 | 59.22938887 | 18.60785561 | 20.55912831 |
| RPS28   | -1.049870507 | 0.000245006 | 0.002114644 | 324.4029286 | 437.4482428 | 174.7193184 | 116.4038974 |
| DEF8    | -1.052171869 | 1.51E-07    | 3.50E-06    | 97.71321711 | 114.1519687 | 42.89186094 | 38.14012145 |
| RGL2    | -1.05233532  | 3.45E-05    | 0.000398729 | 74.98939536 | 110.900552  | 38.09813521 | 32.96507105 |
| ACACA   | -1.053287119 | 0.000633212 | 0.00466933  | 15.59402678 | 18.36698946 | 5.866637235 | 7.16071015  |
| AHNAK   | -1.05347304  | 0.00065944  | 0.004820863 | 683.2825963 | 1379.040952 | 287.2457223 | 506.3758461 |
| ELK3    | -1.053946511 | 0.001941092 | 0.011596293 | 14.02686666 | 21.88203457 | 7.31737002  | 6.380908035 |
| SLC7A6  | -1.055005023 | 0.001317917 | 0.008532463 | 18.49327301 | 36.99672855 | 11.16496567 | 9.996354205 |
| MFSD3   | -1.055982967 | 0.003625627 | 0.019443115 | 11.28433645 | 13.62167856 | 5.362034526 | 4.112392791 |
| ITGAX   | -1.056812729 | 4.29E-06    | 6.75E-05    | 410.9885253 | 666.8049362 | 213.0691242 | 198.1413373 |
| H2AFZ   | -1.057705666 | 1.65E-08    | 4.72E-07    | 143.7877247 | 164.4171138 | 60.11142835 | 57.42250103 |
| MYO19   | -1.059459784 | 2.02E-05    | 0.000253493 | 30.87383796 | 30.58177122 | 10.84958898 | 12.61932496 |
| SLC19A1 | -1.060204222 | 0.007762821 | 0.035767968 | 7.52315216  | 10.8975186  | 2.460568955 | 4.608630501 |
| NME1    | -1.062013092 | 5.64E-06    | 8.64E-05    | 49.05289536 | 55.80221989 | 20.50011577 | 19.35397959 |
| VCL     | -1.06289558  | 0.001588831 | 0.009870178 | 22.56788932 | 44.81770392 | 9.588082206 | 16.16388003 |
| CCNF    | -1.064395762 | 0.00061189  | 0.004549294 | 11.36269446 | 11.24902312 | 3.53284971  | 5.10486821  |
| REV3L   | -1.06546669  | 0.006451098 | 0.030969991 | 11.44105246 | 17.40035206 | 4.668205803 | 6.310016934 |
| PAN2    | -1.068021211 | 0.00049981  | 0.003852971 | 15.12387875 | 20.3881404  | 6.371239943 | 7.089819049 |
| FURIN   | -1.068406587 | 1.98E-05    | 0.000249783 | 156.0115736 | 273.20776   | 85.65694045 | 76.7048806  |
| TGM2    | -1.068824371 | 1.73E-05    | 0.000224278 | 13.47836062 | 17.04884755 | 5.929712573 | 5.60110592  |
| FAH     | -1.069265585 | 6.39E-06    | 9.63E-05    | 76.86998751 | 80.14390728 | 26.68149894 | 32.89417995 |
| DIP2A   | -1.0702704   | 0.00013793  | 0.001307798 | 35.88875035 | 43.32380975 | 17.15712283 | 12.69021606 |
| WDR6    | -1.071092955 | 1.25E-05    | 0.000169859 | 103.1199195 | 155.3658726 | 52.79468908 | 44.73299388 |

|               |              |             |             |             |             |             |             |
|---------------|--------------|-------------|-------------|-------------|-------------|-------------|-------------|
| TNKS1BP1      | -1.071306201 | 0.005316022 | 0.026581953 | 14.96716273 | 42.44504847 | 11.10189033 | 10.56348302 |
| SNHG7         | -1.07177446  | 0.001709401 | 0.010470446 | 19.98207512 | 25.04557517 | 9.714232883 | 7.231601252 |
| SIGLEC15      | -1.07341697  | 0.002656808 | 0.015088702 | 3.76196787  | 8.876367665 | 2.334418278 | 2.411006358 |
| IVNS1ABP      | -1.074411526 | 1.52E-08    | 4.40E-07    | 118.3997307 | 128.6515298 | 44.02721703 | 49.27002437 |
| TXNDC5        | -1.07460412  | 7.94E-08    | 1.96E-06    | 60.25809022 | 72.76231255 | 23.90618405 | 26.30130752 |
| MAN2A2        | -1.075396611 | 8.11E-07    | 1.58E-05    | 58.37749808 | 77.06824281 | 25.10461548 | 25.94685202 |
| CLEC4A        | -1.077525809 | 6.76E-07    | 1.35E-05    | 47.0155872  | 42.62080073 | 16.40021877 | 17.36902875 |
| GIN53         | -1.078212187 | 0.008776039 | 0.039503595 | 8.071658202 | 8.349110899 | 2.523644294 | 3.687046183 |
| SNHG6         | -1.08057232  | 2.62E-05    | 0.000315642 | 36.67233041 | 30.84539961 | 13.68797921 | 11.62684954 |
| PLD2          | -1.080630719 | 3.23E-05    | 0.000377637 | 39.1797866  | 52.9901838  | 16.08484207 | 18.57417747 |
| KCTD20        | -1.080956468 | 5.75E-07    | 1.17E-05    | 83.68713403 | 105.8037366 | 30.46601925 | 40.90487441 |
| RGS12         | -1.081623127 | 6.48E-06    | 9.74E-05    | 44.66484702 | 42.88442911 | 18.16632824 | 14.60427579 |
| MS4A14        | -1.082955973 | 0.00117563  | 0.007753895 | 32.28428207 | 25.30920356 | 9.272705514 | 12.40665165 |
| DCANP1        | -1.083076907 | 0.00284968  | 0.015989011 | 15.12387875 | 19.15787461 | 7.001993328 | 5.813779224 |
| BCAT1         | -1.083558938 | 7.30E-05    | 0.000771062 | 52.03049959 | 98.33426573 | 29.26758782 | 27.01021854 |
| SNHG1         | -1.084091086 | 0.000285268 | 0.002417323 | 33.30293615 | 22.76079585 | 11.60649304 | 9.358334293 |
| ANAPC15       | -1.085978843 | 0.000364056 | 0.002959826 | 26.01564159 | 36.64522404 | 12.67877379 | 10.70526522 |
| PLXNB2        | -1.088418834 | 1.27E-09    | 4.88E-08    | 482.5293848 | 559.8596887 | 209.4107546 | 179.3551954 |
| PYGL          | -1.08917252  | 2.51E-07    | 5.58E-06    | 91.0527866  | 121.885068  | 35.57512167 | 44.09497397 |
| PKD1P4-NPIPA8 | -1.089230835 | 0.004143045 | 0.021749102 | 22.56788932 | 15.81858176 | 8.326575436 | 5.955561427 |
| CCNE1         | -1.089849157 | 0.005783437 | 0.028436379 | 7.91494219  | 6.064331577 | 2.334418278 | 2.907244068 |
| ZMYND8        | -1.089924228 | 0.000191851 | 0.001729295 | 27.97459174 | 43.58743813 | 14.57103395 | 12.05219615 |
| SNRNP200      | -1.090034696 | 5.67E-07    | 1.15E-05    | 122.552705  | 177.0712762 | 54.68694924 | 57.13893662 |
| SPECC1        | -1.091765106 | 1.90E-05    | 0.000241306 | 18.25819899 | 17.92760883 | 6.749691974 | 6.735363542 |
| GOLGA7B       | -1.092650912 | 0.008590416 | 0.03887372  | 8.30673222  | 17.40035206 | 4.605130464 | 4.963086007 |
| DPM3          | -1.093551027 | 0.002569057 | 0.014706094 | 12.38134853 | 17.31247593 | 5.109733172 | 5.955561427 |
| TNFRSF9       | -1.09461864  | 0.004691487 | 0.023974097 | 5.094053973 | 10.19450958 | 2.965171663 | 2.694570763 |

|              |              |             |             |             |             |             |             |
|--------------|--------------|-------------|-------------|-------------|-------------|-------------|-------------|
| WRB          | -1.095061223 | 0.000810503 | 0.005696169 | 13.55671863 | 12.30353665 | 4.731281141 | 4.892194906 |
| PPARG        | -1.097373513 | 0.006360947 | 0.030731445 | 16.84775488 | 32.16354152 | 9.714232883 | 8.436749975 |
| SPTAN1       | -1.097406761 | 2.79E-05    | 0.000333274 | 104.5303636 | 188.5830489 | 55.63307932 | 53.09814384 |
| PLEK2        | -1.098210001 | 0.000788101 | 0.005577778 | 9.168670287 | 13.88530695 | 4.415904449 | 4.112392791 |
| MID1IP1      | -1.098743247 | 1.08E-05    | 0.000151782 | 50.14990745 | 73.5531977  | 25.7984442  | 19.9211084  |
| CUL7         | -1.099277083 | 0.000138078 | 0.00130834  | 17.70969295 | 19.59725525 | 6.812767312 | 7.018927947 |
| LOC100506585 | -1.099824526 | 0.004744678 | 0.02422018  | 9.090312281 | 12.39141278 | 3.848226402 | 4.112392791 |
| SNAPC1       | -1.100006257 | 0.003205161 | 0.01764061  | 10.81418841 | 18.8063701  | 5.298959188 | 5.671997021 |
| 44085        | -1.104199366 | 5.52E-05    | 0.000601475 | 44.19469899 | 44.99345618 | 12.11109575 | 21.05536602 |
| P3H1         | -1.105510552 | 1.64E-05    | 0.000213636 | 49.44468539 | 58.52637985 | 22.83390329 | 16.87279104 |
| ATP13A3      | -1.10615974  | 0.001236193 | 0.008076524 | 69.26926092 | 136.6482574 | 30.2137179  | 46.07992481 |
| LRRC25       | -1.107076953 | 3.27E-08    | 8.67E-07    | 254.1157972 | 237.0027953 | 100.1642683 | 80.53300008 |
| CHAF1A       | -1.109768112 | 0.000402828 | 0.003220618 | 25.23206152 | 26.53946935 | 11.10189033 | 7.869621164 |
| SPR          | -1.109908721 | 2.22E-05    | 0.000274446 | 21.31416122 | 27.3303545  | 7.948123405 | 9.996354205 |
| SDC2         | -1.11154117  | 9.66E-08    | 2.36E-06    | 173.485409  | 244.9116468 | 72.78957139 | 81.17101999 |
| LOC100288778 | -1.1122311   | 0.000862395 | 0.005978821 | 44.89992104 | 77.41974732 | 27.81685503 | 16.87279104 |
| SDC4         | -1.11502504  | 0.000994651 | 0.006761099 | 12.53806455 | 28.82424867 | 7.75889739  | 7.373383454 |
| PIDD1        | -1.115440025 | 0.005702146 | 0.028180711 | 10.10896636 | 14.58831597 | 5.046657834 | 3.970610588 |
| NETO2        | -1.116908342 | 0.00073196  | 0.00526829  | 16.06417482 | 18.45486559 | 4.983582495 | 7.727838961 |
| RUSC2        | -1.119657488 | 0.000368662 | 0.002993899 | 26.1723576  | 52.81443155 | 13.37260252 | 15.52586011 |
| SSH2         | -1.120295989 | 0.000112723 | 0.001099865 | 23.89997542 | 31.10902799 | 10.15576025 | 9.925463104 |
| TPCN1        | -1.127562951 | 4.37E-10    | 1.86E-08    | 166.8249784 | 174.9622491 | 65.47283212 | 58.62764975 |
| SMPD2        | -1.129450207 | 0.000791759 | 0.005590514 | 16.53432285 | 23.11230036 | 5.740486558 | 8.720314381 |
| APBB3        | -1.129938802 | 8.19E-06    | 0.000119056 | 52.57900563 | 56.94460955 | 22.32930058 | 17.29813765 |
| DDB1         | -1.131734606 | 5.22E-07    | 1.08E-05    | 149.2727851 | 233.2241218 | 67.86969499 | 70.82091919 |
| MRPS34       | -1.132505629 | 1.29E-06    | 2.38E-05    | 84.00056606 | 90.3375381  | 33.30440949 | 29.77497149 |
| LAMC1        | -1.132708386 | 7.49E-07    | 1.48E-05    | 39.96336666 | 32.69079829 | 11.66956838 | 14.746058   |

|              |              |             |             |             |             |             |             |
|--------------|--------------|-------------|-------------|-------------|-------------|-------------|-------------|
| PTGR1        | -1.134243433 | 8.84E-05    | 0.000897451 | 49.28796938 | 85.15284657 | 25.73536886 | 22.82764355 |
| TNIK         | -1.139629958 | 0.000330096 | 0.002733373 | 25.31041953 | 45.34496069 | 11.5434177  | 13.96625588 |
| CLEC2D       | -1.1414308   | 0.00080999  | 0.005696169 | 14.02686666 | 14.0610592  | 4.542055126 | 5.60110592  |
| LPAR1        | -1.141935947 | 0.007096326 | 0.033400875 | 5.564202009 | 11.77627988 | 2.839020986 | 3.403481777 |
| ATP2B1       | -1.144186916 | 0.001802622 | 0.0109301   | 19.19849506 | 37.7876137  | 7.885048067 | 12.69021606 |
| FANCG        | -1.144204599 | 0.001554866 | 0.009705138 | 13.2432866  | 11.42477537 | 4.605130464 | 4.254174994 |
| PI4KAP1      | -1.144706324 | 0.005855414 | 0.0287511   | 10.5791144  | 20.82752104 | 6.812767312 | 4.395957196 |
| TGFBR1       | -1.146777537 | 0.000423391 | 0.003354331 | 44.50813101 | 104.046214  | 22.26622525 | 31.19279352 |
| EPAS1        | -1.146878092 | 2.31E-05    | 0.000283461 | 69.58269294 | 115.1186061 | 28.51068376 | 37.92744815 |
| EEF1E1       | -1.148668204 | 0.002042281 | 0.012103553 | 12.45970654 | 8.612739282 | 3.53284971  | 4.04150169  |
| CAD          | -1.149975318 | 2.11E-05    | 0.000262962 | 25.70220956 | 25.39707969 | 10.21883559 | 8.011403367 |
| ZNF692       | -1.150371176 | 0.000128851 | 0.001234692 | 17.31790291 | 17.31247593 | 6.623541297 | 5.742888123 |
| PCCA         | -1.150650287 | 0.000384891 | 0.003101264 | 15.67238479 | 20.03663589 | 7.191219343 | 5.530214819 |
| ATP6V0D2     | -1.153385183 | 0.002549807 | 0.014610934 | 12.14627452 | 39.28150787 | 8.515801452 | 9.854572003 |
| FADS3        | -1.153416777 | 0.000199833 | 0.001790058 | 20.84401319 | 32.60292216 | 9.903458899 | 9.145660989 |
| NSD2         | -1.155773871 | 3.74E-06    | 6.03E-05    | 40.5118727  | 47.54186388 | 14.63410929 | 16.80189994 |
| PIK3IP1      | -1.155975275 | 8.43E-05    | 0.000863712 | 21.78430926 | 18.01548495 | 7.506596036 | 6.664472441 |
| MAPKAPK5-AS1 | -1.157246479 | 0.000385126 | 0.003101425 | 15.43731077 | 14.93982048 | 6.434315281 | 4.325066095 |
| ENKD1        | -1.15824686  | 0.002782705 | 0.015659909 | 12.22463252 | 18.89424623 | 5.803561896 | 5.246650413 |
| NBPF15       | -1.164643395 | 5.29E-05    | 0.000580918 | 31.10891198 | 42.79655298 | 14.0033559  | 12.12308725 |
| NBPF20       | -1.16641137  | 0.008758211 | 0.039472518 | 13.79179264 | 16.52159078 | 3.785151064 | 7.018927947 |
| MKL2         | -1.166692438 | 0.005902313 | 0.028961674 | 6.817930106 | 9.49150056  | 2.523644294 | 3.261699574 |
| HMGB3        | -1.167875755 | 0.000473384 | 0.003680717 | 11.83284249 | 22.76079585 | 6.245089266 | 5.955561427 |
| PPIEL        | -1.169933029 | 0.004776243 | 0.024350378 | 12.06791651 | 22.76079585 | 7.128144005 | 5.10486821  |
| CDKN3        | -1.170924264 | 0.009694054 | 0.042873091 | 7.679868172 | 8.70061541  | 2.334418278 | 3.474372879 |
| LOC102724814 | -1.172736205 | 0.004764626 | 0.024304811 | 8.855238263 | 13.79743082 | 4.605130464 | 3.332590676 |
| ENOSF1       | -1.17344287  | 1.40E-06    | 2.54E-05    | 45.05663705 | 63.62319526 | 18.16632824 | 20.1337817  |

|           |              |             |             |             |             |             |             |
|-----------|--------------|-------------|-------------|-------------|-------------|-------------|-------------|
| FBLN5     | -1.175115652 | 8.53E-05    | 0.000872043 | 34.0081582  | 44.81770392 | 10.84958898 | 17.01457324 |
| SNHG8     | -1.18163335  | 0.000875999 | 0.006054378 | 27.42608569 | 16.34583853 | 8.831178144 | 6.451799136 |
| RFX2      | -1.181695029 | 0.008898898 | 0.040006231 | 8.620164244 | 11.33689924 | 3.911301741 | 3.04902627  |
| FAM129B   | -1.181849787 | 9.80E-06    | 0.000139363 | 323.4626325 | 614.6943925 | 161.410422  | 167.161926  |
| TXLNGY    | -1.182468623 | 0.000377266 | 0.003048338 | 15.59402678 | 14.6761921  | 4.542055126 | 6.09734363  |
| BDH1      | -1.182837729 | 0.000739451 | 0.005308964 | 4.937337961 | 8.876367665 | 2.27134294  | 2.552788561 |
| XPNPEP3   | -1.183132791 | 0.001317027 | 0.008530526 | 9.247028293 | 7.382473493 | 2.649794971 | 3.190808473 |
| NAV1      | -1.185749386 | 0.004991428 | 0.025257346 | 11.9112005  | 34.79982536 | 7.191219343 | 9.145660989 |
| GNA12     | -1.186776765 | 2.72E-07    | 5.95E-06    | 119.9668908 | 184.2771187 | 54.93925059 | 51.113193   |
| PDGFC     | -1.188134139 | 0.008333789 | 0.037962406 | 5.799276027 | 9.667252815 | 2.019041586 | 3.403481777 |
| NBPF1     | -1.188512318 | 3.01E-05    | 0.000355145 | 22.64624733 | 18.8063701  | 7.75889739  | 6.664472441 |
| KIFC2     | -1.189397091 | 0.000263907 | 0.002250853 | 30.16861591 | 47.45398775 | 16.52636944 | 10.35080971 |
| OLFML2B   | -1.190065076 | 2.85E-08    | 7.69E-07    | 259.3657836 | 382.7892913 | 114.7346715 | 108.6767673 |
| PRKAR2A   | -1.190859328 | 2.26E-06    | 3.89E-05    | 25.46713554 | 34.97557761 | 10.78651364 | 10.20902751 |
| ST14      | -1.191922637 | 0.000955945 | 0.006534933 | 92.3848727  | 254.1386403 | 64.08517468 | 56.2173523  |
| LINC01128 | -1.192399326 | 0.003755593 | 0.020013651 | 8.228374214 | 16.69734304 | 4.79435648  | 3.828828385 |
| CAPS      | -1.192996139 | 0.002715471 | 0.015361411 | 10.50075639 | 19.50937913 | 6.245089266 | 4.112392791 |
| CERK      | -1.19430972  | 7.51E-06    | 0.000110315 | 43.64619294 | 76.10160541 | 19.61706103 | 21.97695034 |
| ABHD2     | -1.195932428 | 9.37E-09    | 2.92E-07    | 96.53784702 | 120.4790499 | 33.11518347 | 42.32269643 |
| TUBGCP6   | -1.197533286 | 2.85E-06    | 4.77E-05    | 34.39994823 | 48.94788193 | 14.31873259 | 14.53338469 |
| MXI1      | -1.200790047 | 0.00110858  | 0.007392752 | 10.42239838 | 20.30026427 | 5.551260542 | 5.033977109 |
| ZMIZ1     | -1.201965759 | 3.13E-05    | 0.000366431 | 140.1048984 | 265.2989085 | 59.98527767 | 80.39121787 |
| ARHGEF9   | -1.203383228 | 7.98E-05    | 0.000828831 | 10.50075639 | 10.28238571 | 3.09132234  | 4.112392791 |
| ZAK       | -1.204907557 | 0.000299175 | 0.002513037 | 15.98581681 | 24.69407066 | 6.245089266 | 7.798730063 |
| DFNA5     | -1.205921592 | 0.000252768 | 0.002168668 | 34.94845427 | 81.4620492  | 18.16632824 | 21.97695034 |
| KLHL21    | -1.209046599 | 5.67E-05    | 0.000613912 | 38.94471258 | 73.90470221 | 19.86936238 | 18.85774188 |
| GNG2      | -1.209551869 | 9.33E-06    | 0.000133068 | 13.00821258 | 14.14893533 | 3.848226402 | 5.530214819 |

|               |              |             |             |             |             |             |             |
|---------------|--------------|-------------|-------------|-------------|-------------|-------------|-------------|
| PLEKHM3       | -1.209766144 | 0.004955418 | 0.025118242 | 10.03060835 | 15.73070563 | 4.037452418 | 4.821303805 |
| RCCD1         | -1.209783737 | 0.001408403 | 0.008993215 | 13.79179264 | 13.35805018 | 3.974377079 | 5.388432616 |
| FHOD1         | -1.210164449 | 7.15E-09    | 2.33E-07    | 96.61620503 | 106.067365  | 33.61978618 | 36.01338841 |
| PHLDB1        | -1.211714955 | 9.38E-05    | 0.000942895 | 15.98581681 | 24.25469002 | 7.443520697 | 6.310016934 |
| MAP3K4        | -1.213742025 | 6.85E-05    | 0.000729992 | 19.12013705 | 19.15787461 | 7.254294682 | 5.813779224 |
| TBC1D9        | -1.214196833 | 9.72E-05    | 0.000970752 | 19.35521107 | 35.76646276 | 9.083479498 | 9.783680901 |
| PRKDC         | -1.214279887 | 2.47E-05    | 0.00029979  | 35.3402443  | 51.05690899 | 11.16496567 | 18.57417747 |
| SOCS7         | -1.216926375 | 0.002239417 | 0.013105042 | 7.993300196 | 10.98539473 | 3.217473017 | 3.261699574 |
| ST6GALNAC6    | -1.218333944 | 8.13E-05    | 0.000840058 | 19.82535911 | 36.82097629 | 9.335780852 | 9.996354205 |
| TUBGCP5       | -1.219581145 | 0.000911506 | 0.006269756 | 9.795534335 | 12.65504116 | 4.289753772 | 3.332590676 |
| SLX1A         | -1.219707493 | 0.000814287 | 0.005704355 | 38.86635458 | 38.66637498 | 7.632746713 | 19.07041518 |
| PDP2          | -1.221722041 | 0.003329518 | 0.018090467 | 4.858979955 | 6.152207705 | 1.766740232 | 1.98565975  |
| THEM6         | -1.22237977  | 9.95E-05    | 0.000991185 | 23.6649014  | 15.6428295  | 7.065068666 | 6.310016934 |
| DNHD1         | -1.22445611  | 0.003207951 | 0.017649236 | 11.12762044 | 8.436987027 | 3.659000387 | 2.978135169 |
| PLCB2         | -1.231013716 | 4.00E-14    | 4.21E-12    | 192.7614784 | 194.2071211 | 62.19291452 | 68.90685945 |
| P2RX1         | -1.234462482 | 0.003231177 | 0.017729703 | 8.855238263 | 10.63389022 | 3.848226402 | 2.694570763 |
| CYP1B1        | -1.235374987 | 0.000188083 | 0.001701712 | 205.9256235 | 425.4970894 | 83.4493036  | 130.5112265 |
| ZBTB48        | -1.237251482 | 2.91E-07    | 6.33E-06    | 56.57526394 | 57.47186632 | 20.56319111 | 17.79437536 |
| CH17-340M24.3 | -1.237333406 | 0.005746081 | 0.028312638 | 11.44105246 | 13.79743082 | 5.929712573 | 2.481897459 |
| PCED1B-AS1    | -1.237490976 | 0.006645146 | 0.031711674 | 6.347782069 | 11.60052763 | 2.586719632 | 3.474372879 |
| HS6ST1        | -1.241001507 | 1.28E-05    | 0.00017335  | 23.35146938 | 26.80309773 | 7.001993328 | 9.925463104 |
| MXD4          | -1.242582678 | 3.19E-06    | 5.24E-05    | 57.43720201 | 79.35302213 | 26.05074556 | 19.70843509 |
| LTA4H         | -1.245081281 | 1.22E-06    | 2.27E-05    | 56.57526394 | 95.25860126 | 23.78003337 | 27.15200074 |
| LTB4R         | -1.246271177 | 0.001348826 | 0.008680247 | 12.06791651 | 10.72176635 | 4.542055126 | 3.04902627  |
| EMC9          | -1.249655103 | 0.001754571 | 0.010692659 | 9.482102311 | 11.5126515  | 3.53284971  | 3.474372879 |
| ALOX5AP       | -1.250590047 | 6.15E-06    | 9.32E-05    | 64.88121258 | 99.30090314 | 25.7984442  | 29.06606048 |
| HCCS          | -1.252525106 | 6.98E-07    | 1.39E-05    | 29.14996183 | 25.30920356 | 9.02040416  | 9.145660989 |

|           |              |             |             |             |             |             |             |
|-----------|--------------|-------------|-------------|-------------|-------------|-------------|-------------|
| SLC4A7    | -1.253095873 | 0.000710102 | 0.005142036 | 24.84027149 | 35.59071051 | 7.695822051 | 12.54843385 |
| ALDOC     | -1.253410222 | 0.000282808 | 0.002402499 | 10.42239838 | 17.8397327  | 4.920507157 | 4.466848298 |
| PAPSS2    | -1.253729021 | 0.000572284 | 0.004294658 | 9.403744305 | 18.89424623 | 4.79435648  | 4.608630501 |
| UCK2      | -1.254682384 | 0.000198979 | 0.00178352  | 11.59776847 | 17.75185657 | 4.731281141 | 5.033977109 |
| MYO15B    | -1.254879739 | 1.55E-05    | 0.000204549 | 81.17967784 | 51.49628963 | 25.92459488 | 18.07793976 |
| ZFPM1     | -1.256732272 | 0.008497258 | 0.038551712 | 6.504498081 | 8.349110899 | 2.586719632 | 2.340115256 |
| STAB1     | -1.257355199 | 3.07E-11    | 1.70E-09    | 3440.465755 | 4185.980225 | 1306.03859  | 1226.558545 |
| PPME1     | -1.260364654 | 6.04E-06    | 9.17E-05    | 22.95967935 | 27.06672611 | 6.875842651 | 9.783680901 |
| PELI3     | -1.261180642 | 0.000183454 | 0.001666097 | 18.414915   | 21.0032733  | 6.938917989 | 6.09734363  |
| NBPF11    | -1.261461593 | 1.85E-05    | 0.000235766 | 28.52309778 | 39.01787949 | 11.16496567 | 11.20150293 |
| HERC2P9   | -1.262528437 | 0.000540525 | 0.004115873 | 14.73208872 | 21.70628232 | 5.803561896 | 6.239125832 |
| PPIP5K1   | -1.266892786 | 0.001136903 | 0.007560667 | 6.896288112 | 10.10663345 | 2.902096325 | 2.694570763 |
| HACD3     | -1.268313496 | 2.77E-09    | 9.95E-08    | 33.53801017 | 34.97557761 | 10.91266432 | 11.69774064 |
| ACSF2     | -1.26967762  | 1.05E-07    | 2.53E-06    | 41.68724279 | 45.43283682 | 15.51716403 | 13.11556267 |
| TNFAIP8L1 | -1.270047966 | 1.44E-05    | 0.000191637 | 24.9186295  | 35.67858663 | 11.22804101 | 8.649423279 |
| CDKN2C    | -1.271253366 | 0.00033176  | 0.002743624 | 12.06791651 | 15.02769661 | 5.046657834 | 3.828828385 |
| ZHX3      | -1.273262031 | 0.000296045 | 0.002491097 | 11.20597844 | 10.37026184 | 3.280548356 | 3.828828385 |
| HOOK2     | -1.274300177 | 0.001034489 | 0.006979292 | 11.83284249 | 12.21566052 | 4.731281141 | 3.119917372 |
| FGR       | -1.274556115 | 1.95E-05    | 0.000246249 | 127.4109014 | 273.9986451 | 62.44521588 | 69.47398826 |
| SELPLG    | -1.275339395 | 3.57E-11    | 1.91E-09    | 190.4890963 | 247.5479307 | 67.42816762 | 76.4922073  |
| FILIP1L   | -1.27689871  | 0.002659958 | 0.015100651 | 5.094053973 | 7.558225749 | 2.082116924 | 2.056550851 |
| NPHP4     | -1.280114417 | 0.000758855 | 0.005414132 | 12.22463252 | 18.19123721 | 5.109733172 | 4.821303805 |
| ABCA7     | -1.28070882  | 1.03E-05    | 0.000145047 | 50.77677149 | 47.62974001 | 18.92323231 | 13.11556267 |
| HERC1     | -1.281233744 | 6.21E-06    | 9.39E-05    | 39.10142859 | 58.3506276  | 13.24645184 | 18.71595967 |
| ZNF767P   | -1.283082835 | 0.003979774 | 0.021014314 | 7.444794154 | 7.11884511  | 2.145192263 | 2.623679662 |
| STXBP5    | -1.284529894 | 0.001716849 | 0.010500502 | 12.06791651 | 23.11230036 | 5.109733172 | 6.380908035 |
| APMAP     | -1.285704981 | 3.87E-09    | 1.34E-07    | 227.1606431 | 341.8390158 | 88.55840602 | 96.9797356  |



|          |              |             |             |             |             |             |             |
|----------|--------------|-------------|-------------|-------------|-------------|-------------|-------------|
| UBE2T    | -1.290354193 | 0.009875096 | 0.043473918 | 4.1537579   | 5.712827066 | 1.703664893 | 1.48942204  |
| CNNM3    | -1.290862951 | 3.50E-05    | 0.000404593 | 19.43356908 | 20.56389266 | 7.065068666 | 5.884670325 |
| PFKFB2   | -1.295060818 | 0.000228068 | 0.001995909 | 13.40000261 | 10.28238571 | 2.775945648 | 4.963086007 |
| USE1     | -1.295478727 | 0.000793515 | 0.005596883 | 17.39626092 | 25.30920356 | 8.957328821 | 4.750412703 |
| ZNF219   | -1.295757049 | 2.46E-05    | 0.000299338 | 32.98950412 | 54.39620185 | 14.8233353  | 13.39912707 |
| MPRIP    | -1.295776942 | 1.34E-06    | 2.47E-05    | 42.00067482 | 68.54425842 | 18.4186296  | 17.29813765 |
| PLAUR    | -1.298794766 | 4.39E-06    | 6.91E-05    | 296.2724044 | 576.8197814 | 153.3367787 | 128.030038  |
| FAM20C   | -1.298948216 | 2.26E-05    | 0.000277435 | 232.8024195 | 518.9094132 | 127.2866639 | 115.1278575 |
| ENDOG    | -1.299898424 | 0.000783813 | 0.005561004 | 12.06791651 | 20.12451202 | 5.803561896 | 4.537739399 |
| AHRR     | -1.302351767 | 4.41E-05    | 0.0004966   | 89.7990585  | 201.676592  | 42.63955958 | 51.39675741 |
| TUBB3    | -1.303210212 | 8.88E-05    | 0.000898978 | 11.28433645 | 15.37920112 | 4.983582495 | 3.54526398  |
| FAM83H   | -1.3069316   | 0.003644356 | 0.01952179  | 8.071658202 | 23.28805262 | 4.478979787 | 5.60110592  |
| SLC25A10 | -1.307334148 | 0.001812702 | 0.010981988 | 9.873892341 | 7.470349621 | 3.406699033 | 2.127441952 |
| HLA-DMB  | -1.307346938 | 1.84E-06    | 3.23E-05    | 76.16476545 | 108.8794011 | 31.97982738 | 27.29378294 |
| MOB3B    | -1.307933446 | 0.003307423 | 0.018004309 | 7.13136213  | 3.867428383 | 1.766740232 | 1.772986445 |
| CEP55    | -1.310051698 | 0.007965787 | 0.036574699 | 8.150016208 | 10.19450958 | 2.965171663 | 2.907244068 |
| FAM173B  | -1.31009823  | 0.00267176  | 0.015155728 | 5.250769985 | 7.294597366 | 1.892890909 | 2.127441952 |
| LPIN3    | -1.310655889 | 0.001013593 | 0.006863992 | 6.817930106 | 9.052119921 | 2.523644294 | 2.552788561 |
| HERC2P2  | -1.312569609 | 5.94E-06    | 9.05E-05    | 51.56035155 | 82.25293435 | 20.68934178 | 22.11873254 |
| IFFO2    | -1.313257206 | 0.003212764 | 0.017662348 | 8.228374214 | 7.997606388 | 1.82981557  | 3.403481777 |
| RCC1     | -1.314006761 | 2.59E-08    | 7.07E-07    | 32.44099808 | 36.82097629 | 10.7234383  | 11.41417623 |
| ASB13    | -1.316005175 | 6.13E-07    | 1.24E-05    | 25.38877754 | 25.48495581 | 8.011198744 | 8.224076671 |
| FADS1    | -1.316385395 | 1.03E-08    | 3.17E-07    | 103.6684256 | 88.66789168 | 25.98767022 | 35.5880418  |
| AKR1B1   | -1.317911173 | 0.000563138 | 0.004239252 | 71.6200011  | 214.3307544 | 45.09949779 | 46.00903371 |
| SLC11A1  | -1.318739028 | 5.86E-06    | 8.94E-05    | 147.705625  | 310.379362  | 73.10494808 | 72.73497893 |
| HERC2    | -1.319855718 | 1.22E-07    | 2.89E-06    | 44.74320503 | 61.33841594 | 16.52636944 | 17.22724655 |
| MCM6     | -1.320949487 | 9.80E-08    | 2.38E-06    | 37.37755246 | 29.96663833 | 9.777308222 | 11.69774064 |

|           |              |             |             |             |             |             |             |
|-----------|--------------|-------------|-------------|-------------|-------------|-------------|-------------|
| ATAD2     | -1.321659899 | 0.005445432 | 0.027076286 | 8.30673222  | 8.70061541  | 1.703664893 | 3.757937284 |
| LMF1      | -1.322625746 | 0.000250074 | 0.002149962 | 12.92985458 | 22.67291972 | 4.478979787 | 6.877145745 |
| PHF19     | -1.324113252 | 7.66E-09    | 2.47E-07    | 49.67975941 | 53.6053167  | 15.6433147  | 17.15635544 |
| LINC01089 | -1.324603804 | 0.004121732 | 0.021676644 | 7.836584184 | 6.240083833 | 2.334418278 | 2.127441952 |
| COL23A1   | -1.327614455 | 9.57E-08    | 2.34E-06    | 47.64245125 | 50.09027159 | 17.15712283 | 13.68269148 |
| NCAPD3    | -1.328893854 | 7.87E-06    | 0.000115031 | 19.04177905 | 22.32141521 | 6.749691974 | 6.310016934 |
| NSUN5P2   | -1.32920258  | 0.004522227 | 0.023284958 | 6.269424063 | 5.273446427 | 2.208267601 | 1.418530939 |
| PPIF      | -1.330630265 | 3.13E-07    | 6.79E-06    | 285.6940736 | 474.7955971 | 128.989698  | 110.8035004 |
| RTL6      | -1.331426263 | 3.08E-05    | 0.000361652 | 17.94476696 | 28.73637254 | 6.875842651 | 7.869621164 |
| MSC-AS1   | -1.333930277 | 0.008001325 | 0.036691172 | 5.720918021 | 13.88530695 | 2.712870309 | 3.474372879 |
| LSP1      | -1.33491453  | 2.21E-05    | 0.000273487 | 394.533344  | 977.0076672 | 219.8812608 | 211.8233198 |
| AFG3L1P   | -1.335066046 | 8.10E-07    | 1.58E-05    | 32.91114612 | 38.05124208 | 11.60649304 | 10.70526522 |
| KCTD7     | -1.336894713 | 1.36E-05    | 0.000183284 | 20.13879113 | 28.03336352 | 5.803561896 | 9.429225394 |
| NECTIN1   | -1.339772629 | 0.001468229 | 0.009272654 | 5.329127991 | 8.964243793 | 2.208267601 | 2.269224155 |
| PFKM      | -1.340595788 | 8.49E-07    | 1.65E-05    | 16.53432285 | 19.94875976 | 5.425109865 | 6.026452528 |
| CYFIP2    | -1.340737494 | 0.007728547 | 0.035647848 | 3.840325876 | 4.834065788 | 1.766740232 | 0.922293229 |
| KCP       | -1.3414283   | 0.001576102 | 0.009799539 | 10.50075639 | 16.78521916 | 4.289753772 | 4.254174994 |
| IRAK3     | -1.342816609 | 0.000110336 | 0.001080964 | 18.72834702 | 34.09681633 | 6.749691974 | 9.854572003 |
| PFAS      | -1.34364143  | 0.000125006 | 0.001201844 | 10.89254642 | 10.80964248 | 3.722075725 | 3.04902627  |
| SDHAP2    | -1.344662666 | 8.08E-05    | 0.000836722 | 20.53058116 | 19.68513138 | 5.866637235 | 6.735363542 |
| DUSP7     | -1.34632775  | 7.06E-06    | 0.000105034 | 15.51566878 | 16.08221014 | 3.974377079 | 5.955561427 |
| MEGF6     | -1.346582567 | 0.00382091  | 0.020316711 | 4.623905936 | 11.86415601 | 2.649794971 | 2.481897459 |
| S1PR1     | -1.34698112  | 0.000157306 | 0.001459861 | 9.952250347 | 9.139996049 | 2.586719632 | 3.403481777 |
| TRPV4     | -1.347602683 | 4.88E-06    | 7.63E-05    | 15.98581681 | 19.59725525 | 6.434315281 | 4.608630501 |
| LIG1      | -1.349057    | 7.42E-06    | 0.000109541 | 28.05294974 | 24.60619454 | 8.200424759 | 8.224076671 |
| KCNK13    | -1.351126457 | 0.000737201 | 0.005295444 | 10.73583041 | 24.25469002 | 5.488185203 | 5.388432616 |
| NBEAL2    | -1.351952509 | 1.26E-07    | 2.96E-06    | 32.98950412 | 37.87548983 | 12.86799981 | 9.074769887 |

|              |              |             |             |             |             |             |             |
|--------------|--------------|-------------|-------------|-------------|-------------|-------------|-------------|
| CDA          | -1.353701215 | 0.008235859 | 0.037623197 | 2.351523761 | 8.349110899 | 2.145192263 | 1.134966533 |
| SLC43A2      | -1.355677936 | 3.27E-05    | 0.000381985 | 222.7725948 | 567.8564164 | 123.6913696 | 121.6498389 |
| CYTOR        | -1.358640904 | 0.002137903 | 0.012592684 | 9.952250347 | 7.030968982 | 2.775945648 | 2.481897459 |
| ITGAM        | -1.359083297 | 1.86E-13    | 1.68E-11    | 117.7728667 | 144.3813567 | 38.98118995 | 42.25180533 |
| TTC3         | -1.359377576 | 6.87E-07    | 1.37E-05    | 32.36264007 | 43.06018137 | 11.10189033 | 12.26486945 |
| PDPN         | -1.362938099 | 1.17E-09    | 4.54E-08    | 54.85138781 | 73.64107383 | 20.68934178 | 18.92863298 |
| ZNF318       | -1.363730697 | 0.000109902 | 0.001077446 | 13.87015065 | 26.7152216  | 5.866637235 | 6.664472441 |
| LOC100129034 | -1.363916579 | 2.13E-07    | 4.79E-06    | 86.42966424 | 148.072154  | 31.91675204 | 40.62131    |
| NBPF26       | -1.364234068 | 5.94E-06    | 9.05E-05    | 67.7021008  | 107.7370114 | 22.89697863 | 31.40546682 |
| F13A1        | -1.364491578 | 7.91E-09    | 2.54E-07    | 74.59760533 | 71.53204676 | 16.58944478 | 28.78249607 |
| WDR76        | -1.372167944 | 0.006434563 | 0.030942078 | 6.896288112 | 4.39468515  | 1.766740232 | 1.702095344 |
| SLC9A7       | -1.3722698   | 2.00E-05    | 0.000250915 | 12.06791651 | 23.37592875 | 4.79435648  | 6.09734363  |
| GIN54        | -1.372959525 | 0.006215549 | 0.030208474 | 5.799276027 | 5.361322555 | 1.388288201 | 2.056550851 |
| NME4         | -1.373349969 | 1.84E-09    | 6.83E-08    | 74.28417331 | 52.9901838  | 19.68013637 | 19.35397959 |
| KRT10        | -1.376901676 | 0.000111417 | 0.001089339 | 9.482102311 | 11.77627988 | 2.902096325 | 3.616155081 |
| DISP1        | -1.376979261 | 0.000101273 | 0.001004216 | 17.00447089 | 24.69407066 | 6.49739062  | 6.239125832 |
| ISYNA1       | -1.379434297 | 0.009069503 | 0.040558414 | 4.702263942 | 3.340171616 | 1.451363539 | 0.99318433  |
| PHF10        | -1.381032304 | 5.25E-06    | 8.14E-05    | 13.00821258 | 12.83079341 | 3.911301741 | 3.970610588 |
| CENPO        | -1.381433653 | 0.000176584 | 0.001609777 | 10.42239838 | 11.86415601 | 3.722075725 | 3.04902627  |
| SKI          | -1.38226948  | 7.04E-05    | 0.000748454 | 16.61268086 | 28.9121248  | 5.362034526 | 8.578532178 |
| UACA         | -1.382276242 | 0.000557054 | 0.00420882  | 10.89254642 | 15.20344886 | 3.974377079 | 3.970610588 |
| TMEM106C     | -1.383536854 | 2.39E-06    | 4.09E-05    | 21.31416122 | 23.28805262 | 7.506596036 | 6.026452528 |
| RNF215       | -1.384547041 | 0.00138495  | 0.0088738   | 6.347782069 | 9.49150056  | 2.334418278 | 2.481897459 |
| NINJ2        | -1.387403448 | 0.00314785  | 0.017391507 | 6.7395721   | 7.030968982 | 1.388288201 | 2.836352966 |
| DNAAF5       | -1.389162943 | 5.31E-05    | 0.000582652 | 11.59776847 | 18.89424623 | 4.289753772 | 4.963086007 |
| SMAD7        | -1.391012867 | 0.000605158 | 0.004507417 | 13.47836062 | 33.30593118 | 6.118938589 | 8.082294468 |
| TMC8         | -1.391297223 | 1.49E-08    | 4.33E-07    | 50.93348751 | 40.07239302 | 13.81412989 | 13.75358258 |

|          |              |             |             |             |             |             |             |
|----------|--------------|-------------|-------------|-------------|-------------|-------------|-------------|
| NUSAP1   | -1.391348322 | 0.00060532  | 0.004507417 | 14.02686666 | 20.47601653 | 3.848226402 | 6.664472441 |
| PRPF8    | -1.39821083  | 8.92E-12    | 5.55E-10    | 174.8958531 | 239.9905837 | 58.34531887 | 66.85101751 |
| GRAMD4   | -1.401149703 | 8.03E-15    | 9.42E-13    | 163.5339422 | 177.7742852 | 49.89322351 | 52.81457944 |
| SEC61A2  | -1.402807855 | 0.00893708  | 0.040119627 | 4.937337961 | 4.834065788 | 1.514438878 | 1.418530939 |
| TBC1D16  | -1.404352925 | 3.96E-06    | 6.34E-05    | 19.19849506 | 31.72416088 | 8.011198744 | 7.231601252 |
| KLHL22   | -1.404749747 | 2.49E-05    | 0.000301403 | 20.92237119 | 32.0756654  | 8.957328821 | 6.877145745 |
| SLC16A6  | -1.409920456 | 0.000792225 | 0.005590514 | 14.5753727  | 41.47841107 | 6.749691974 | 10.06724531 |
| OPRL1    | -1.410095153 | 0.000713865 | 0.00516639  | 5.642560015 | 6.679464471 | 1.703664893 | 1.98565975  |
| PRADC1   | -1.410225212 | 5.46E-05    | 0.000595664 | 14.18358267 | 21.17902555 | 6.182013927 | 4.325066095 |
| TMEM132A | -1.415880559 | 0.001904212 | 0.011416567 | 3.526893852 | 7.470349621 | 1.82981557  | 1.418530939 |
| PCNT     | -1.416084672 | 1.65E-05    | 0.000214861 | 23.5865434  | 38.49062272 | 9.651157545 | 8.791205482 |
| DUSP14   | -1.41833502  | 9.40E-05    | 0.000944252 | 7.836584184 | 12.21566052 | 4.100527756 | 1.772986445 |
| SPSB2    | -1.419604278 | 0.003271133 | 0.017874183 | 22.3328153  | 11.77627988 | 6.182013927 | 3.899719487 |
| VEGFA    | -1.421639299 | 0.000176177 | 0.0016081   | 13.71343464 | 32.16354152 | 6.308164604 | 7.302492353 |
| S100A9   | -1.422004815 | 2.84E-14    | 3.12E-12    | 394.611702  | 445.7964749 | 126.4036091 | 122.6423143 |
| CABLES1  | -1.422312273 | 0.003747111 | 0.019983205 | 10.10896636 | 4.218932894 | 2.397493617 | 1.843877547 |
| CIDEB    | -1.427106046 | 0.003226334 | 0.017709859 | 4.232115906 | 5.009818044 | 1.577514216 | 1.134966533 |
| TBL1XR1  | -1.429096695 | 8.23E-08    | 2.03E-06    | 48.19095729 | 50.26602384 | 11.60649304 | 17.58170205 |
| PDLIM4   | -1.431278888 | 0.003234182 | 0.017736401 | 3.056745816 | 9.227872177 | 1.82981557  | 1.772986445 |
| STK36    | -1.45403411  | 0.000242283 | 0.002097411 | 8.463448232 | 14.58831597 | 3.406699033 | 3.261699574 |
| POC1A    | -1.457254334 | 0.001677672 | 0.010319901 | 9.638818323 | 7.997606388 | 3.154397679 | 1.914768648 |
| CHST15   | -1.458484231 | 2.64E-07    | 5.79E-06    | 61.90360835 | 116.5246242 | 23.78003337 | 27.86091175 |
| GK5      | -1.458977856 | 0.00572013  | 0.028240576 | 7.836584184 | 2.988667105 | 1.577514216 | 1.560313141 |
| GABBR1   | -1.459399895 | 0.006776054 | 0.032197971 | 10.03060835 | 24.25469002 | 5.677411219 | 4.183283892 |
| PSTPIP1  | -1.461143212 | 3.26E-08    | 8.66E-07    | 44.351415   | 53.95682121 | 16.40021877 | 11.83952284 |
| ORC1     | -1.461853995 | 0.004499528 | 0.023198529 | 5.485844003 | 6.064331577 | 1.82981557  | 1.48942204  |
| TSPAN15  | -1.462073101 | 7.09E-12    | 4.49E-10    | 63.07897844 | 67.13824037 | 17.47249952 | 20.1337817  |

|          |              |             |             |             |             |             |             |
|----------|--------------|-------------|-------------|-------------|-------------|-------------|-------------|
| CTDSPL   | -1.462295149 | 0.000320091 | 0.002662385 | 4.858979955 | 3.955304511 | 1.072911508 | 1.48942204  |
| HAAO     | -1.462801682 | 0.002029823 | 0.012050158 | 11.59776847 | 9.667252815 | 4.289753772 | 1.772986445 |
| PRAM1    | -1.46289196  | 2.70E-06    | 4.56E-05    | 19.35521107 | 14.93982048 | 4.79435648  | 5.10486821  |
| EMILIN1  | -1.463440266 | 2.72E-05    | 0.000326775 | 15.90745881 | 10.63389022 | 4.226678433 | 3.403481777 |
| PNN      | -1.464013617 | 2.77E-08    | 7.54E-07    | 60.02301621 | 72.85018868 | 17.2832735  | 21.05536602 |
| IFT140   | -1.467795967 | 0.001842736 | 0.01112546  | 6.582856087 | 9.403624432 | 2.649794971 | 1.914768648 |
| P4HTM    | -1.468651357 | 2.01E-05    | 0.000252757 | 21.94102527 | 28.2969919  | 8.326575436 | 6.026452528 |
| MYO1B    | -1.468806259 | 0.003122081 | 0.017268974 | 1.019437659 | 2.988667105 | 0.694459477 | 0.426055519 |
| AATK     | -1.471516166 | 1.49E-08    | 4.33E-07    | 64.09763252 | 84.09833303 | 21.50932118 | 20.91358382 |
| IFT88    | -1.472217699 | 0.001565327 | 0.009757551 | 6.817930106 | 7.821854132 | 2.397493617 | 1.772986445 |
| C19orf35 | -1.475065187 | 0.001387756 | 0.008884966 | 9.717176329 | 8.436987027 | 2.902096325 | 2.269224155 |
| PLEKHH3  | -1.477799826 | 0.003873552 | 0.020558746 | 7.444794154 | 6.415836088 | 2.839020986 | 1.064075432 |
| RGCC     | -1.479090546 | 2.84E-05    | 0.000336949 | 42.78425488 | 112.0429417 | 23.338506   | 20.70091051 |
| HAGHL    | -1.481377252 | 0.000131085 | 0.001251943 | 13.40000261 | 16.43371465 | 5.235883849 | 3.190808473 |
| ARRDC4   | -1.48576586  | 3.49E-10    | 1.53E-08    | 29.93354189 | 36.64522404 | 8.705027467 | 10.20902751 |
| PITPNC1  | -1.487427643 | 7.23E-06    | 0.000107116 | 19.43356908 | 41.82991558 | 8.011198744 | 9.358334293 |
| GPR82    | -1.489125755 | 7.87E-05    | 0.000819228 | 10.97090443 | 6.943092855 | 2.460568955 | 2.623679662 |
| RNF125   | -1.48919627  | 0.004309883 | 0.022469625 | 3.526893852 | 7.11884511  | 1.514438878 | 1.48942204  |
| MICAL2   | -1.491246538 | 2.78E-06    | 4.68E-05    | 13.00821258 | 20.47601653 | 4.163603095 | 5.317541514 |
| CCNA2    | -1.492185866 | 0.001624788 | 0.010045181 | 7.366436148 | 9.843005071 | 1.640589555 | 3.261699574 |
| FEN1     | -1.492229351 | 8.81E-08    | 2.16E-06    | 39.41486062 | 36.46947178 | 11.73264372 | 9.641898698 |
| MRO      | -1.492790815 | 1.03E-08    | 3.17E-07    | 41.45216878 | 48.15699678 | 10.91266432 | 14.46249359 |
| DHRS13   | -1.494406724 | 0.005345264 | 0.026663081 | 3.37017784  | 3.515923872 | 0.883685492 | 1.064075432 |
| MXD3     | -1.496229691 | 0.000719374 | 0.005200287 | 9.482102311 | 8.70061541  | 2.902096325 | 2.198333054 |
| IFT22    | -1.496863612 | 0.000481848 | 0.00373445  | 6.347782069 | 5.712827066 | 1.892890909 | 1.48942204  |
| OTUD3    | -1.500842598 | 0.004039432 | 0.021290372 | 8.620164244 | 6.679464471 | 1.766740232 | 2.552788561 |
| ZSWIM4   | -1.503773126 | 0.000208886 | 0.001853896 | 13.79179264 | 35.06345374 | 6.118938589 | 7.586056758 |

|           |              |             |             |             |             |             |             |
|-----------|--------------|-------------|-------------|-------------|-------------|-------------|-------------|
| LMNB2     | -1.505931875 | 1.45E-08    | 4.24E-07    | 35.96710835 | 52.0235464  | 10.91266432 | 13.75358258 |
| GUSBP11   | -1.506380596 | 1.56E-05    | 0.000205031 | 16.37760684 | 24.51831841 | 6.623541297 | 4.750412703 |
| PC        | -1.508264933 | 5.31E-05    | 0.000583098 | 17.55297693 | 44.20257103 | 7.632746713 | 9.641898698 |
| ITGB2-AS1 | -1.508995389 | 4.41E-05    | 0.0004966   | 11.12762044 | 11.86415601 | 4.289753772 | 2.056550851 |
| SNHG3     | -1.509923477 | 1.70E-08    | 4.86E-07    | 33.06786213 | 28.73637254 | 8.326575436 | 8.932987685 |
| SGK494    | -1.514395649 | 0.009721559 | 0.042955243 | 4.388831918 | 2.81291485  | 0.946760831 | 1.064075432 |
| PTPRM     | -1.515306083 | 0.000673344 | 0.004917523 | 5.877634033 | 18.27911334 | 3.028247002 | 3.687046183 |
| NCAPD2    | -1.517028644 | 6.73E-07    | 1.35E-05    | 29.69846787 | 49.47513869 | 10.09268491 | 11.91041394 |
| SLC2A3    | -1.517544546 | 5.28E-08    | 1.35E-06    | 65.82150865 | 121.7971918 | 27.438403   | 24.52902999 |
| CHST2     | -1.518222415 | 0.000778175 | 0.005531943 | 5.407485997 | 12.30353665 | 2.019041586 | 2.907244068 |
| CD44      | -1.522204043 | 9.50E-09    | 2.95E-07    | 369.6938561 | 717.7730903 | 138.5140741 | 162.6957866 |
| IFT122    | -1.525321077 | 7.06E-10    | 2.86E-08    | 47.87752527 | 43.14805749 | 11.22804101 | 13.96625588 |
| PINK1     | -1.526073099 | 1.04E-09    | 4.12E-08    | 80.47445578 | 117.9306422 | 28.76298511 | 25.87596091 |
| CD163L1   | -1.526499365 | 1.80E-09    | 6.68E-08    | 44.50813101 | 75.48647251 | 15.32793801 | 17.79437536 |
| SLC22A5   | -1.526639133 | 0.001541998 | 0.009633147 | 5.642560015 | 7.206721238 | 1.766740232 | 1.772986445 |
| SWI5      | -1.528095742 | 0.000223069 | 0.001958092 | 7.209720136 | 14.0610592  | 3.406699033 | 2.411006358 |
| SIRPB1    | -1.530176999 | 8.74E-08    | 2.15E-06    | 51.24691953 | 49.91451933 | 13.1833765  | 14.6751669  |
| EXOSC5    | -1.532766662 | 0.000143647 | 0.001354    | 9.717176329 | 11.16114699 | 3.09132234  | 2.623679662 |
| NBPF14    | -1.533804003 | 0.00021215  | 0.001875942 | 25.38877754 | 48.68425354 | 7.191219343 | 13.25734487 |
| P2RY2     | -1.533820122 | 0.008758298 | 0.039472518 | 5.015695967 | 7.558225749 | 2.145192263 | 1.276748736 |
| TSPYL5    | -1.535978173 | 0.000310132 | 0.002588628 | 9.011954275 | 10.19450958 | 2.902096325 | 2.340115256 |
| PSPH      | -1.538279253 | 1.42E-05    | 0.000189652 | 9.090312281 | 9.930881199 | 2.775945648 | 2.411006358 |
| TBC1D30   | -1.538574625 | 0.000146781 | 0.001376343 | 6.269424063 | 5.976455449 | 1.451363539 | 1.914768648 |
| BMP1      | -1.5415823   | 4.33E-05    | 0.000489256 | 7.053004124 | 11.5126515  | 2.902096325 | 2.127441952 |
| CXXC5     | -1.544657987 | 1.90E-08    | 5.38E-07    | 59.63122618 | 106.067365  | 22.07699923 | 23.04031686 |
| FAM168B   | -1.544962798 | 1.17E-06    | 2.19E-05    | 42.23574884 | 94.20408772 | 17.5986502  | 19.56665289 |
| MSANTD3   | -1.546096465 | 5.84E-06    | 8.92E-05    | 18.414915   | 43.23593362 | 7.506596036 | 9.287443192 |

|              |              |             |             |             |             |             |             |
|--------------|--------------|-------------|-------------|-------------|-------------|-------------|-------------|
| NBPF10       | -1.549261556 | 0.004832286 | 0.02458911  | 7.679868172 | 20.12451202 | 2.902096325 | 4.679521602 |
| LINC00294    | -1.550263249 | 2.15E-06    | 3.70E-05    | 13.40000261 | 19.59725525 | 4.605130464 | 4.325066095 |
| C2orf74      | -1.550497225 | 0.000502512 | 0.003871727 | 8.228374214 | 18.10336108 | 3.785151064 | 3.332590676 |
| SH3YL1       | -1.553917268 | 0.001765788 | 0.010751936 | 3.448535846 | 5.449198683 | 1.262137524 | 1.134966533 |
| PTPN22       | -1.554715258 | 0.000107188 | 0.001053697 | 4.623905936 | 7.11884511  | 0.946760831 | 2.269224155 |
| ATG16L2      | -1.556119773 | 4.26E-07    | 8.96E-06    | 59.63122618 | 84.0104569  | 24.78923879 | 13.75358258 |
| PTGFRN       | -1.558160788 | 9.23E-09    | 2.89E-07    | 27.89623373 | 42.44504847 | 9.525006868 | 9.429225394 |
| LUCAT1       | -1.562368997 | 0.001059979 | 0.007128756 | 7.679868172 | 13.53380244 | 3.53284971  | 2.127441952 |
| LOC100288203 | -1.56288392  | 0.0039072   | 0.020690526 | 6.7395721   | 7.997606388 | 1.640589555 | 2.340115256 |
| DPCD         | -1.567414968 | 3.32E-05    | 0.000386234 | 7.993300196 | 8.70061541  | 2.27134294  | 2.198333054 |
| PEX6         | -1.567968442 | 7.51E-05    | 0.000788222 | 14.88880473 | 23.81530939 | 5.992787912 | 4.325066095 |
| ATP9B        | -1.570006447 | 6.61E-07    | 1.33E-05    | 28.60145578 | 44.02681877 | 7.885048067 | 11.62684954 |
| PCSK6        | -1.580274958 | 2.18E-05    | 0.000271157 | 22.48953131 | 64.50195654 | 11.66956838 | 11.41417623 |
| THNSL2       | -1.580838547 | 0.001117164 | 0.007437889 | 7.209720136 | 10.80964248 | 2.839020986 | 1.914768648 |
| SLC16A10     | -1.582552126 | 0.000526244 | 0.004026628 | 4.467189924 | 10.28238571 | 1.451363539 | 2.481897459 |
| RAD51        | -1.58270012  | 0.002799435 | 0.015742865 | 6.896288112 | 4.746189661 | 1.199062185 | 1.914768648 |
| SLC5A3       | -1.589148275 | 2.16E-05    | 0.000268266 | 13.32164461 | 31.98778927 | 5.046657834 | 6.948036846 |
| DDX12P       | -1.589276249 | 0.001018956 | 0.006893275 | 6.426140075 | 9.052119921 | 1.892890909 | 2.198333054 |
| AGPAT4       | -1.595433024 | 2.53E-05    | 0.000306302 | 20.45222316 | 49.03575805 | 9.714232883 | 8.507641076 |
| LINC01503    | -1.597762227 | 7.10E-05    | 0.000753776 | 8.541806238 | 10.63389022 | 2.145192263 | 2.907244068 |
| HIPK2        | -1.598434576 | 1.02E-05    | 0.000144864 | 32.12756606 | 70.21390485 | 11.66956838 | 15.24229571 |
| DANCR        | -1.598906215 | 0.00083936  | 0.00584313  | 3.291819834 | 7.733978005 | 1.262137524 | 1.631204243 |
| TMEM161B     | -1.602487397 | 5.34E-05    | 0.000584414 | 6.896288112 | 6.943092855 | 1.514438878 | 2.127441952 |
| TNNI2        | -1.603352292 | 0.000337324 | 0.002780085 | 7.288078142 | 5.712827066 | 1.766740232 | 1.631204243 |
| ANKH         | -1.603447914 | 1.34E-09    | 5.12E-08    | 144.1795147 | 256.1597912 | 43.20723763 | 61.81774931 |
| FBP1         | -1.606327823 | 2.30E-08    | 6.33E-07    | 30.87383796 | 48.2448729  | 11.35419168 | 9.21655209  |
| BAIAP2-AS1   | -1.607667106 | 4.92E-11    | 2.57E-09    | 30.40368992 | 38.05124208 | 8.831178144 | 9.003878786 |

|           |              |             |             |             |             |             |             |
|-----------|--------------|-------------|-------------|-------------|-------------|-------------|-------------|
| CDKN2B    | -1.610574784 | 0.000423504 | 0.003354331 | 6.269424063 | 11.86415601 | 2.902096325 | 1.772986445 |
| NSUN5P1   | -1.612225502 | 7.59E-05    | 0.000795134 | 8.855238263 | 8.524863154 | 2.712870309 | 1.772986445 |
| EHD1      | -1.619261448 | 3.01E-14    | 3.29E-12    | 78.67222164 | 94.46771611 | 22.96005397 | 21.76427703 |
| CCDC125   | -1.619653736 | 0.000205027 | 0.001827512 | 5.329127991 | 7.11884511  | 1.451363539 | 1.772986445 |
| TLR5      | -1.621594883 | 0.000214099 | 0.00188855  | 8.698522251 | 8.964243793 | 1.955966247 | 2.623679662 |
| IRGQ      | -1.624295998 | 1.13E-10    | 5.49E-09    | 39.72829264 | 59.05363662 | 11.73264372 | 13.75358258 |
| MIB2      | -1.624741892 | 4.13E-06    | 6.56E-05    | 31.81413403 | 46.57522648 | 11.66956838 | 8.436749975 |
| TRIM16    | -1.626658281 | 8.00E-06    | 0.000116609 | 13.32164461 | 17.48822819 | 3.280548356 | 4.679521602 |
| UPK3BL1   | -1.630172386 | 0.000144207 | 0.001358384 | 49.6014014  | 35.85433889 | 15.89561606 | 5.813779224 |
| SLC43A1   | -1.633855284 | 1.44E-05    | 0.00019147  | 11.75448449 | 15.29132499 | 3.911301741 | 2.978135169 |
| ADK       | -1.636478586 | 4.22E-06    | 6.68E-05    | 18.80670503 | 44.20257103 | 7.191219343 | 8.932987685 |
| IL16      | -1.638084291 | 9.75E-12    | 5.99E-10    | 37.9260585  | 36.55734791 | 8.705027467 | 10.35080971 |
| DLG5      | -1.639120708 | 0.004067552 | 0.021421402 | 3.526893852 | 6.943092855 | 1.451363539 | 1.205857634 |
| NBPF19    | -1.641971899 | 3.62E-06    | 5.86E-05    | 47.79916726 | 88.05275878 | 16.58944478 | 18.00704866 |
| PLXNA1    | -1.644492108 | 3.95E-10    | 1.72E-08    | 47.09394521 | 49.65089095 | 14.12950658 | 10.35080971 |
| TTLL4     | -1.644716085 | 1.82E-11    | 1.06E-09    | 65.27300261 | 86.11948397 | 17.40942418 | 21.12625712 |
| GADD45A   | -1.646731916 | 0.000295688 | 0.002490237 | 4.075399894 | 5.624950938 | 1.577514216 | 0.851402128 |
| MCM4      | -1.652036702 | 1.56E-10    | 7.41E-09    | 34.63502225 | 29.00000092 | 6.938917989 | 9.21655209  |
| WDR54     | -1.657008518 | 0.0012363   | 0.008076524 | 8.620164244 | 7.030968982 | 1.892890909 | 2.056550851 |
| ANKRD42   | -1.657896243 | 0.000785503 | 0.005567579 | 6.974646118 | 20.73964491 | 3.154397679 | 3.828828385 |
| FN1       | -1.658463749 | 1.52E-09    | 5.73E-08    | 1622.873447 | 3166.617143 | 548.5668497 | 658.791714  |
| GLIS3     | -1.660190597 | 0.0072378   | 0.033889909 | 3.840325876 | 5.53707481  | 0.883685492 | 1.48942204  |
| CDR2L     | -1.663031936 | 0.000924592 | 0.006344643 | 5.955992039 | 6.064331577 | 1.325212862 | 1.702095344 |
| MSC       | -1.665872572 | 1.85E-05    | 0.000236522 | 34.32159023 | 97.98276122 | 17.53557486 | 15.52586011 |
| TMEM198B  | -1.667050697 | 1.60E-05    | 0.000208968 | 9.795534335 | 14.93982048 | 2.460568955 | 3.757937284 |
| FAM212B   | -1.66706713  | 1.65E-06    | 2.93E-05    | 15.90745881 | 21.44265394 | 4.857431818 | 4.466848298 |
| TEN1-CDK3 | -1.667576195 | 4.58E-05    | 0.000511922 | 11.44105246 | 19.06999849 | 3.659000387 | 3.970610588 |



|              |              |             |             |             |             |             |             |
|--------------|--------------|-------------|-------------|-------------|-------------|-------------|-------------|
| PIM1         | -1.668124791 | 1.21E-05    | 0.000165516 | 29.77682588 | 71.26841838 | 13.43567786 | 11.76863174 |
| TFPI         | -1.668761383 | 8.80E-06    | 0.000126375 | 16.69103887 | 35.15132987 | 5.677411219 | 7.302492353 |
| DNAH1        | -1.673050069 | 0.000112989 | 0.00110172  | 10.03060835 | 14.93982048 | 3.028247002 | 3.190808473 |
| CD101        | -1.68051218  | 1.08E-05    | 0.000151782 | 11.75448449 | 16.43371465 | 2.902096325 | 4.112392791 |
| ADCY6        | -1.682581618 | 0.000356054 | 0.00291117  | 5.720918021 | 3.428047744 | 1.135986847 | 1.134966533 |
| MRC1         | -1.682812436 | 3.76E-07    | 8.00E-06    | 93.48188479 | 210.2005764 | 28.5737591  | 46.93061802 |
| CBX5         | -1.689594811 | 2.72E-10    | 1.25E-08    | 26.01564159 | 25.48495581 | 5.235883849 | 7.515165657 |
| ZNF584       | -1.691570478 | 0.000826559 | 0.005767925 | 4.623905936 | 7.90973026  | 1.451363539 | 1.631204243 |
| PDE4DIP      | -1.694756183 | 0.004478216 | 0.023121693 | 79.61251772 | 291.0466139 | 41.75650485 | 49.34091547 |
| PPARD        | -1.701381783 | 1.27E-09    | 4.87E-08    | 30.63876394 | 49.29938644 | 8.515801452 | 11.05972073 |
| PSMC3IP      | -1.708906838 | 0.008642435 | 0.039035676 | 2.900029804 | 3.955304511 | 0.946760831 | 0.709619925 |
| IRS2         | -1.714590206 | 0.000895799 | 0.006176432 | 6.661214093 | 18.89424623 | 2.586719632 | 3.616155081 |
| YPEL3        | -1.716287867 | 3.02E-08    | 8.07E-07    | 34.16487421 | 61.33841594 | 11.92186973 | 11.13061183 |
| LOC284454    | -1.718507332 | 9.67E-05    | 0.000967079 | 11.9112005  | 34.79982536 | 5.929712573 | 5.317541514 |
| SLC39A8      | -1.719733741 | 7.47E-10    | 3.01E-08    | 176.3062972 | 357.3052143 | 58.7237709  | 70.18289928 |
| TLE3         | -1.727583385 | 3.24E-06    | 5.31E-05    | 32.6760721  | 77.68337571 | 12.04802041 | 14.46249359 |
| TONSL        | -1.729392297 | 2.46E-05    | 0.000299338 | 10.97090443 | 8.964243793 | 1.703664893 | 3.119917372 |
| PLEKHF1      | -1.729694388 | 0.003090745 | 0.017121898 | 1.489585695 | 2.461410339 | 0.252932107 | 0.709619925 |
| KLHL17       | -1.731542284 | 8.88E-05    | 0.000898978 | 10.73583041 | 10.72176635 | 2.712870309 | 2.411006358 |
| SMAGP        | -1.732610757 | 0.007441223 | 0.034673648 | 1.959733731 | 3.6038      | 0.883685492 | 0.426055519 |
| GAS5         | -1.737267955 | 5.85E-08    | 1.48E-06    | 38.00441651 | 57.55974245 | 12.42647244 | 10.27991861 |
| IL7R         | -1.737332031 | 0.003442853 | 0.018597019 | 2.97838781  | 7.733978005 | 1.135986847 | 1.418530939 |
| LOC100506100 | -1.737730509 | 0.005745166 | 0.028312638 | 3.840325876 | 4.834065788 | 1.135986847 | 0.922293229 |
| EMC3-AS1     | -1.742011615 | 0.007656468 | 0.035368276 | 3.213461828 | 4.131056766 | 0.757534815 | 0.99318433  |
| PVT1         | -1.743513584 | 0.005025567 | 0.025395607 | 1.803017719 | 3.6038      | 0.442158123 | 0.851402128 |
| PLIN2        | -1.74922165  | 7.77E-07    | 1.53E-05    | 271.8247065 | 790.0072674 | 137.189492  | 113.2137978 |
| TIAM1        | -1.753984012 | 1.59E-05    | 0.000208217 | 6.896288112 | 17.92760883 | 2.523644294 | 3.332590676 |

|            |              |             |             |             |             |             |             |
|------------|--------------|-------------|-------------|-------------|-------------|-------------|-------------|
| SLC25A29   | -1.755930592 | 1.25E-06    | 2.33E-05    | 20.13879113 | 42.35717234 | 7.380445359 | 7.302492353 |
| UNC119B    | -1.756654304 | 2.52E-07    | 5.58E-06    | 14.81044672 | 21.70628232 | 4.920507157 | 3.616155081 |
| GPC1       | -1.759848466 | 0.000783923 | 0.005561004 | 2.116449743 | 2.725038722 | 0.694459477 | 0.426055519 |
| TPX2       | -1.760456095 | 1.68E-06    | 2.98E-05    | 17.1611869  | 17.2245998  | 3.217473017 | 4.892194906 |
| CDCA4      | -1.761107292 | 8.26E-05    | 0.000851335 | 12.92985458 | 23.20017649 | 2.523644294 | 6.026452528 |
| SH3BP5-AS1 | -1.767151468 | 5.75E-08    | 1.46E-06    | 21.78430926 | 21.61840619 | 4.289753772 | 5.884670325 |
| MAPRE3     | -1.769048911 | 4.91E-09    | 1.66E-07    | 24.44848146 | 34.71194923 | 6.49739062  | 7.302492353 |
| ITGA11     | -1.779828281 | 0.001709156 | 0.010470446 | 4.232115906 | 2.988667105 | 0.757534815 | 0.922293229 |
| SHCBP1     | -1.780593915 | 1.30E-05    | 0.000175744 | 14.18358267 | 13.53380244 | 3.217473017 | 3.190808473 |
| SMAD6      | -1.780781542 | 0.001717149 | 0.010500502 | 1.959733731 | 2.988667105 | 0.442158123 | 0.709619925 |
| PNP        | -1.784423675 | 7.67E-10    | 3.08E-08    | 74.67596334 | 146.2267554 | 25.67229353 | 25.237941   |
| AK4        | -1.785230305 | 0.00595146  | 0.029163162 | 1.332869683 | 10.63389022 | 1.199062185 | 1.560313141 |
| NRAV       | -1.786218938 | 0.001234548 | 0.008072387 | 3.605251858 | 4.834065788 | 0.883685492 | 1.064075432 |
| CD93       | -1.786807473 | 3.00E-15    | 3.76E-13    | 203.1830932 | 248.7781965 | 41.81958018 | 62.66844253 |
| SESN3      | -1.788656929 | 1.59E-05    | 0.000208217 | 6.034350045 | 7.997606388 | 1.262137524 | 1.98565975  |
| ABCA2      | -1.78918194  | 3.30E-05    | 0.000384586 | 6.112708051 | 9.227872177 | 2.145192263 | 1.347639837 |
| HIP1       | -1.790273287 | 0.000111915 | 0.001092721 | 6.191066057 | 16.87309529 | 2.460568955 | 2.836352966 |
| PLPP4      | -1.790916462 | 0.000145633 | 0.001366912 | 5.329127991 | 7.206721238 | 1.388288201 | 1.48942204  |
| TCF19      | -1.790978018 | 4.44E-09    | 1.51E-07    | 22.3328153  | 20.91539717 | 5.298959188 | 4.608630501 |
| BLM        | -1.79133824  | 0.002578199 | 0.014740886 | 5.250769985 | 4.306809022 | 1.262137524 | 0.922293229 |
| TLN2       | -1.793114304 | 0.005095723 | 0.025685079 | 2.194807749 | 1.846277444 | 0.694459477 | 0.213382215 |
| PYROXD2    | -1.79370014  | 0.009109245 | 0.040710904 | 2.743313791 | 2.549286466 | 0.379082784 | 0.851402128 |
| FOXM1      | -1.79384871  | 6.29E-08    | 1.58E-06    | 21.0790872  | 20.56389266 | 3.785151064 | 5.813779224 |
| TNFRSF12A  | -1.796906047 | 1.04E-05    | 0.000146576 | 7.053004124 | 19.421503   | 3.659000387 | 2.340115256 |
| NT5DC2     | -1.797543264 | 1.80E-12    | 1.30E-10    | 126.8623954 | 202.2038487 | 41.94573086 | 33.03596215 |
| MICALL2    | -1.798530825 | 7.98E-07    | 1.56E-05    | 16.37760684 | 30.58177122 | 5.929712573 | 4.750412703 |
| WDHD1      | -1.798963507 | 0.000376364 | 0.003044459 | 6.347782069 | 7.11884511  | 1.514438878 | 1.560313141 |

|               |              |             |             |             |             |             |             |
|---------------|--------------|-------------|-------------|-------------|-------------|-------------|-------------|
| MAD2L1        | -1.799175343 | 0.000613974 | 0.00455775  | 6.034350045 | 6.064331577 | 0.946760831 | 1.843877547 |
| SH3BP5        | -1.801614988 | 1.13E-09    | 4.43E-08    | 33.06786213 | 59.75664564 | 9.02040416  | 12.19397835 |
| ALDH7A1       | -1.802176914 | 1.24E-06    | 2.30E-05    | 8.071658202 | 7.206721238 | 1.514438878 | 1.98565975  |
| CLCF1         | -1.80221368  | 0.001397526 | 0.008931662 | 5.172411979 | 11.5126515  | 2.082116924 | 1.702095344 |
| TANC2         | -1.812118196 | 7.01E-07    | 1.39E-05    | 12.61642255 | 23.28805262 | 3.53284971  | 4.608630501 |
| WDR62         | -1.813754909 | 1.80E-05    | 0.0002317   | 9.873892341 | 12.21566052 | 2.839020986 | 2.127441952 |
| SIGLEC10      | -1.815294197 | 4.55E-10    | 1.93E-08    | 22.09774128 | 31.63628476 | 6.623541297 | 5.459323717 |
| SRGAP1        | -1.818109674 | 0.005162334 | 0.025935303 | 1.803017719 | 1.758401317 | 0.379082784 | 0.426055519 |
| ORC6          | -1.826097722 | 0.0008849   | 0.006107125 | 9.090312281 | 4.39468515  | 1.135986847 | 1.914768648 |
| ABCA5         | -1.826724453 | 0.000603408 | 0.004499746 | 3.135103822 | 4.043180638 | 0.757534815 | 0.851402128 |
| ME3           | -1.828011723 | 9.93E-05    | 0.00098961  | 4.858979955 | 8.788491538 | 2.019041586 | 0.99318433  |
| RASSF2        | -1.83018474  | 2.12E-07    | 4.76E-06    | 59.39615216 | 151.1478185 | 18.79708163 | 28.42804056 |
| SKA3          | -1.834479358 | 0.006110975 | 0.029783004 | 4.232115906 | 3.340171616 | 0.505233461 | 1.205857634 |
| ARAP3         | -1.838347895 | 4.20E-05    | 0.000476087 | 3.605251858 | 8.085482516 | 1.703664893 | 0.851402128 |
| PTPRCAP       | -1.839472596 | 0.000981179 | 0.006694751 | 6.504498081 | 7.206721238 | 2.019041586 | 0.99318433  |
| FAM86DP       | -1.841150228 | 3.79E-05    | 0.000433776 | 5.172411979 | 8.436987027 | 1.388288201 | 1.631204243 |
| SLX1B-SULT1A4 | -1.847339012 | 3.82E-06    | 6.13E-05    | 14.02686666 | 17.57610431 | 4.100527756 | 2.836352966 |
| IQGAP3        | -1.848127974 | 1.16E-05    | 0.000159667 | 8.855238263 | 12.30353665 | 1.325212862 | 3.403481777 |
| LOC103344931  | -1.849898253 | 0.007107088 | 0.033418853 | 1.803017719 | 3.691676127 | 0.505233461 | 0.709619925 |
| STIL          | -1.85570058  | 0.001382934 | 0.008869831 | 4.780621949 | 4.043180638 | 0.946760831 | 0.99318433  |
| CDCA8         | -1.860032416 | 8.43E-05    | 0.000863712 | 7.758226178 | 8.436987027 | 1.703664893 | 1.843877547 |
| SGPP2         | -1.860156971 | 0.00014262  | 0.001347835 | 9.403744305 | 20.03663589 | 2.839020986 | 3.616155081 |
| AQP9          | -1.860219147 | 8.39E-05    | 0.000861928 | 25.62385156 | 93.5010787  | 12.80492447 | 13.25734487 |
| TMEM80        | -1.860826068 | 1.81E-06    | 3.18E-05    | 13.00821258 | 18.8063701  | 3.343623694 | 3.616155081 |
| SDC1          | -1.861225711 | 0.008340015 | 0.037966799 | 0.706005634 | 1.143268422 | 0.379082784 | 0.000708911 |
| MACC1         | -1.862662873 | 0.000820884 | 0.005736645 | 7.52315216  | 9.579376688 | 1.955966247 | 1.772986445 |
| NT5C3B        | -1.863615999 | 0.000188589 | 0.001705214 | 16.06417482 | 73.90470221 | 11.60649304 | 7.940512265 |

|          |              |             |             |             |             |             |             |
|----------|--------------|-------------|-------------|-------------|-------------|-------------|-------------|
| MIR5047  | -1.864695033 | 6.49E-05    | 0.000697548 | 6.817930106 | 6.943092855 | 1.577514216 | 1.418530939 |
| CDK1     | -1.866917568 | 1.99E-05    | 0.000250007 | 13.40000261 | 10.98539473 | 2.019041586 | 3.332590676 |
| SLC16A7  | -1.867266106 | 0.000571256 | 0.004289175 | 1.959733731 | 2.637162594 | 0.694459477 | 0.284273317 |
| ZNF589   | -1.867708644 | 3.14E-10    | 1.40E-08    | 16.06417482 | 16.96097142 | 4.100527756 | 3.04902627  |
| NCAPG2   | -1.868447411 | 6.77E-05    | 0.000723485 | 10.50075639 | 12.4792889  | 1.577514216 | 3.474372879 |
| LAT      | -1.870026083 | 7.78E-06    | 0.000113933 | 11.59776847 | 39.72088851 | 5.740486558 | 5.388432616 |
| MIR3064  | -1.871199114 | 9.03E-05    | 0.000911433 | 5.720918021 | 6.591588344 | 1.325212862 | 1.347639837 |
| CACNA2D4 | -1.872292004 | 4.83E-12    | 3.09E-10    | 44.89992104 | 62.4808056  | 13.81412989 | 9.358334293 |
| TBXAS1   | -1.877745164 | 9.89E-18    | 2.23E-15    | 124.3549392 | 166.9655215 | 27.7537797  | 35.3753685  |
| PLK4     | -1.881420803 | 0.001313735 | 0.008516852 | 6.191066057 | 4.39468515  | 0.883685492 | 1.418530939 |
| NCAPG    | -1.882199113 | 0.000350532 | 0.002875798 | 10.6574724  | 9.052119921 | 1.451363539 | 2.836352966 |
| BRICD5   | -1.888370247 | 0.003152425 | 0.017396806 | 3.918683882 | 5.712827066 | 1.135986847 | 0.922293229 |
| DYRK3    | -1.888761257 | 0.000578885 | 0.004337429 | 1.489585695 | 2.900790978 | 0.505233461 | 0.426055519 |
| AMPD3    | -1.893525896 | 1.53E-16    | 2.39E-14    | 82.90355397 | 113.4489597 | 18.48170494 | 23.60744567 |
| VAMP1    | -1.894153413 | 2.57E-06    | 4.37E-05    | 9.795534335 | 9.755128943 | 2.649794971 | 1.48942204  |
| UBXN11   | -1.894380483 | 3.91E-10    | 1.71E-08    | 51.87378358 | 82.07718209 | 17.53557486 | 10.91793852 |
| LCAT     | -1.895689625 | 0.002723658 | 0.015401686 | 4.937337961 | 7.11884511  | 1.82981557  | 0.709619925 |
| AMPD2    | -1.896945255 | 1.37E-17    | 2.90E-15    | 66.91852074 | 79.96815503 | 16.52636944 | 14.746058   |
| CASTOR1  | -1.899265657 | 0.000304857 | 0.002553329 | 5.250769985 | 11.86415601 | 2.397493617 | 1.205857634 |
| CHTF18   | -1.902826966 | 1.64E-06    | 2.91E-05    | 15.04552074 | 12.12778439 | 3.469774371 | 2.269224155 |
| SPOCD1   | -1.907555106 | 0.000244137 | 0.002109664 | 3.37017784  | 14.50043984 | 1.325212862 | 2.481897459 |
| SAPCD2   | -1.90837373  | 0.000586512 | 0.004385468 | 5.329127991 | 9.139996049 | 1.766740232 | 1.276748736 |
| USP13    | -1.910140366 | 0.002288072 | 0.013346471 | 2.97838781  | 6.503712216 | 1.072911508 | 0.922293229 |
| ANLN     | -1.911707037 | 0.000833261 | 0.005806274 | 8.071658202 | 7.206721238 | 1.262137524 | 1.98565975  |
| TLE1     | -1.913020243 | 0.008007459 | 0.036707636 | 0.706005634 | 3.779552255 | 0.379082784 | 0.567837722 |
| SKA1     | -1.914517989 | 0.002712098 | 0.015348348 | 5.094053973 | 4.131056766 | 0.820610154 | 1.134966533 |
| JAML     | -1.918399742 | 0.001851504 | 0.011160841 | 4.1537579   | 3.076543233 | 1.072911508 | 0.426055519 |

|             |              |             |             |             |             |             |             |
|-------------|--------------|-------------|-------------|-------------|-------------|-------------|-------------|
| CXCR4       | -1.919400684 | 4.30E-07    | 9.01E-06    | 82.82519596 | 223.9092523 | 35.07051896 | 29.20784268 |
| PCED1B      | -1.923735589 | 0.001008484 | 0.006832594 | 3.605251858 | 4.39468515  | 0.757534815 | 0.922293229 |
| LY6K        | -1.92429484  | 0.004776933 | 0.024350378 | 5.720918021 | 15.90645789 | 2.523644294 | 1.98565975  |
| ZNF704      | -1.927914376 | 0.000791718 | 0.005590514 | 3.213461828 | 6.767340599 | 0.883685492 | 1.205857634 |
| CLLU1OS     | -1.928985902 | 0.000206596 | 0.001839294 | 9.482102311 | 29.61513382 | 4.037452418 | 4.112392791 |
| SLC7A11     | -1.929476087 | 1.32E-07    | 3.08E-06    | 90.73935457 | 223.9092523 | 27.81685503 | 37.99833925 |
| CRIPAK      | -1.929795555 | 3.45E-07    | 7.42E-06    | 14.65373071 | 16.96097142 | 3.659000387 | 2.907244068 |
| TBC1D17     | -1.929832447 | 7.18E-12    | 4.51E-10    | 31.03055397 | 46.31159809 | 7.695822051 | 8.436749975 |
| ZWINT       | -1.931344261 | 1.12E-10    | 5.47E-09    | 20.21714914 | 22.40929134 | 4.542055126 | 4.325066095 |
| CLEC10A     | -1.937235535 | 0.000113351 | 0.0011045   | 11.83284249 | 26.36371709 | 3.406699033 | 4.537739399 |
| TMEM97      | -1.940051816 | 8.56E-06    | 0.000123342 | 9.168670287 | 8.788491538 | 2.27134294  | 1.418530939 |
| SERINC2     | -1.940284841 | 9.63E-07    | 1.85E-05    | 31.18726998 | 90.60116649 | 12.23724642 | 12.97378046 |
| MT1E        | -1.940619408 | 2.93E-05    | 0.000346725 | 16.29924884 | 21.26690168 | 5.488185203 | 2.198333054 |
| TMPO-AS1    | -1.944065249 | 0.008594106 | 0.038878225 | 2.821671798 | 2.373534211 | 0.442158123 | 0.638728823 |
| NOL4L       | -1.945811465 | 0.000639608 | 0.004704474 | 2.429881767 | 5.976455449 | 1.072911508 | 0.638728823 |
| CTTN        | -1.945967875 | 3.55E-08    | 9.37E-07    | 9.090312281 | 22.40929134 | 3.217473017 | 3.261699574 |
| FAM102A     | -1.946198662 | 5.32E-07    | 1.10E-05    | 4.467189924 | 7.821854132 | 1.703664893 | 0.780511026 |
| RAB11FIP4   | -1.94752276  | 0.000430663 | 0.003394266 | 5.015695967 | 11.86415601 | 1.766740232 | 1.702095344 |
| SH3PXD2A    | -1.94790291  | 1.34E-06    | 2.47E-05    | 12.38134853 | 37.61186144 | 5.172808511 | 5.10486821  |
| MMP9        | -1.951903809 | 3.25E-17    | 6.17E-15    | 4480.903359 | 4875.104819 | 1147.341038 | 766.1208415 |
| AMT         | -1.953744974 | 0.000988172 | 0.006726558 | 6.896288112 | 11.33689924 | 2.965171663 | 0.709619925 |
| RNASEH1-AS1 | -1.959693015 | 0.002615023 | 0.014904187 | 3.918683882 | 3.6038      | 0.757534815 | 0.780511026 |
| CHI3L1      | -1.966543483 | 1.24E-08    | 3.73E-07    | 201.9293651 | 72.85018868 | 29.83526587 | 25.94685202 |
| GOLGA8B     | -1.966934996 | 0.00093452  | 0.006400595 | 2.664955785 | 7.206721238 | 1.072911508 | 0.922293229 |
| NME1-NME2   | -1.966996203 | 0.000197312 | 0.001771882 | 5.799276027 | 4.570437405 | 1.640589555 | 0.426055519 |
| CMTM4       | -1.968232347 | 1.41E-05    | 0.000188327 | 6.661214093 | 10.98539473 | 2.334418278 | 1.205857634 |
| THBD        | -1.974228382 | 1.58E-14    | 1.79E-12    | 124.9034452 | 210.1127002 | 36.26895039 | 31.33457572 |

|              |              |             |             |             |             |             |             |
|--------------|--------------|-------------|-------------|-------------|-------------|-------------|-------------|
| SOX13        | -1.976471676 | 1.57E-07    | 3.62E-06    | 5.094053973 | 5.888579322 | 0.757534815 | 1.48942204  |
| RUBCNL       | -1.978662358 | 7.44E-08    | 1.86E-06    | 10.97090443 | 15.46707725 | 3.028247002 | 2.269224155 |
| KIF11        | -1.98359714  | 0.000730176 | 0.005260693 | 10.89254642 | 10.63389022 | 1.388288201 | 2.978135169 |
| A1BG         | -1.98714701  | 4.23E-05    | 0.000479934 | 8.071658202 | 17.04884755 | 3.280548356 | 1.702095344 |
| NPIPA2       | -1.988902978 | 0.00816853  | 0.037362933 | 3.76196787  | 2.988667105 | 0.379082784 | 0.99318433  |
| CCNB2        | -1.99046011  | 5.39E-06    | 8.32E-05    | 11.20597844 | 10.54601409 | 2.019041586 | 2.340115256 |
| NCAPH        | -1.99072971  | 2.98E-06    | 4.96E-05    | 10.10896636 | 10.01875733 | 1.703664893 | 2.340115256 |
| LOC105372480 | -1.997952898 | 0.00550707  | 0.027330121 | 3.683609864 | 3.955304511 | 1.072911508 | 0.426055519 |
| SERPIN2      | -1.999675523 | 0.00165722  | 0.010215867 | 236.4852458 | 862.5929489 | 96.19052198 | 122.6423143 |
| PLPP3        | -2.000143396 | 1.36E-06    | 2.48E-05    | 24.44848146 | 52.19929865 | 6.812767312 | 8.436749975 |
| GIN52        | -2.002513311 | 0.000224268 | 0.001966227 | 9.560460317 | 4.746189661 | 1.955966247 | 0.851402128 |
| MCM7         | -2.003226586 | 3.76E-18    | 9.04E-16    | 61.98196636 | 63.79894752 | 12.17417109 | 12.76110716 |
| MAPK8IP3     | -2.00536955  | 5.70E-14    | 5.71E-12    | 53.28422769 | 81.81355371 | 13.1833765  | 13.54090927 |
| ZNF367       | -2.005450695 | 0.007059654 | 0.033293421 | 3.291819834 | 1.758401317 | 0.505233461 | 0.496946621 |
| SLC12A6      | -2.00550721  | 5.22E-11    | 2.71E-09    | 26.95593766 | 39.72088851 | 7.191219343 | 5.955561427 |
| CKAP2L       | -2.006301823 | 0.007345013 | 0.034302874 | 4.467189924 | 4.658313533 | 0.883685492 | 0.922293229 |
| NQO2         | -2.008560784 | 3.78E-16    | 5.56E-14    | 161.496634  | 116.3488719 | 27.62762902 | 27.22289184 |
| INSR         | -2.011255955 | 4.26E-06    | 6.71E-05    | 10.10896636 | 19.86088364 | 2.586719632 | 3.332590676 |
| STMN1        | -2.016508934 | 7.53E-14    | 7.39E-12    | 47.17230322 | 50.35389997 | 7.75889739  | 11.48506733 |
| SIGLEC7      | -2.019539362 | 3.76E-15    | 4.63E-13    | 67.38866877 | 48.50850129 | 11.10189033 | 11.62684954 |
| CELF6        | -2.021189599 | 2.29E-05    | 0.000281432 | 6.974646118 | 7.733978005 | 1.325212862 | 1.560313141 |
| ASMTL-AS1    | -2.022774627 | 0.00017201  | 0.001578052 | 5.485844003 | 11.5126515  | 2.019041586 | 1.276748736 |
| DDIT4        | -2.02409872  | 3.71E-13    | 3.19E-11    | 81.49310986 | 117.3155093 | 18.98630764 | 19.8502173  |
| OIP5         | -2.028224684 | 0.005001719 | 0.025299618 | 3.291819834 | 4.306809022 | 0.5683088   | 0.922293229 |
| ACP6         | -2.03352051  | 0.001422623 | 0.009061558 | 3.448535846 | 7.470349621 | 1.451363539 | 0.638728823 |
| FABP3        | -2.035245004 | 2.04E-07    | 4.61E-06    | 7.679868172 | 17.2245998  | 2.27134294  | 2.552788561 |
| DST          | -2.037638204 | 2.72E-06    | 4.60E-05    | 9.011954275 | 13.88530695 | 1.892890909 | 2.552788561 |

|           |              |             |             |             |             |             |             |
|-----------|--------------|-------------|-------------|-------------|-------------|-------------|-------------|
| LOC441081 | -2.040127736 | 5.42E-07    | 1.11E-05    | 20.60893917 | 20.21238815 | 3.848226402 | 4.04150169  |
| NUP210    | -2.040783186 | 2.04E-08    | 5.72E-07    | 16.61268086 | 23.02442424 | 4.35282911  | 3.261699574 |
| EDNRB     | -2.041309385 | 0.00066171  | 0.004835009 | 9.325386299 | 16.08221014 | 1.072911508 | 3.899719487 |
| PGBD5     | -2.052350189 | 0.001017035 | 0.00688407  | 2.97838781  | 7.733978005 | 1.451363539 | 0.567837722 |
| BHLHE41   | -2.056909749 | 0.000324141 | 0.002689871 | 7.758226178 | 13.18229793 | 1.135986847 | 2.907244068 |
| LTBP2     | -2.057682008 | 5.46E-07    | 1.11E-05    | 13.87015065 | 41.65416332 | 4.79435648  | 5.813779224 |
| CDC25A    | -2.066585021 | 0.000295168 | 0.00248807  | 4.075399894 | 5.449198683 | 0.883685492 | 0.922293229 |
| SEC31B    | -2.067026383 | 1.77E-05    | 0.000227696 | 7.52315216  | 11.33689924 | 2.397493617 | 1.134966533 |
| MYC       | -2.068701191 | 7.06E-06    | 0.000105034 | 20.60893917 | 72.93806481 | 11.41726702 | 6.168234731 |
| UNC5B     | -2.071065136 | 0.00111741  | 0.007437889 | 1.646301707 | 3.691676127 | 0.442158123 | 0.567837722 |
| ICAM5     | -2.073188228 | 0.00097717  | 0.006670548 | 4.310473912 | 4.834065788 | 1.072911508 | 0.638728823 |
| ZNF587B   | -2.074929276 | 0.000332459 | 0.002746863 | 3.37017784  | 5.888579322 | 0.757534815 | 0.99318433  |
| PAPLN     | -2.080294214 | 4.08E-07    | 8.65E-06    | 11.44105246 | 17.66398044 | 2.965171663 | 2.481897459 |
| DEPTOR    | -2.081674609 | 0.000250141 | 0.002149962 | 4.388831918 | 3.340171616 | 1.135986847 | 0.284273317 |
| RFLNB     | -2.081716394 | 1.23E-09    | 4.74E-08    | 9.482102311 | 14.41256371 | 2.208267601 | 2.269224155 |
| SH3PXD2B  | -2.084073922 | 0.004991612 | 0.025257346 | 12.22463252 | 51.23266125 | 4.163603095 | 7.798730063 |
| LRRC37A2  | -2.088890714 | 0.002542819 | 0.01460771  | 4.232115906 | 11.68840375 | 1.009836169 | 1.98565975  |
| ITGAE     | -2.089867499 | 3.85E-12    | 2.52E-10    | 41.29545276 | 53.69319283 | 10.47113695 | 7.16071015  |
| ANKDD1A   | -2.090805326 | 1.96E-05    | 0.000247791 | 9.795534335 | 10.80964248 | 2.460568955 | 1.347639837 |
| ZNF395    | -2.103501262 | 4.02E-08    | 1.05E-06    | 19.12013705 | 43.76319039 | 5.866637235 | 5.742888123 |
| PHACTR1   | -2.103527279 | 0.007487272 | 0.034809541 | 1.724659713 | 3.691676127 | 0.5683088   | 0.426055519 |
| ALOX5     | -2.104807478 | 1.92E-08    | 5.43E-07    | 45.29171107 | 131.0241853 | 14.88641064 | 17.72348426 |
| KYAT1     | -2.109320424 | 0.000241197 | 0.00209052  | 4.623905936 | 3.340171616 | 0.757534815 | 0.709619925 |
| IFT172    | -2.110562657 | 2.11E-06    | 3.66E-05    | 8.385090226 | 6.855216727 | 1.388288201 | 1.418530939 |
| ASF1B     | -2.110863062 | 6.35E-09    | 2.08E-07    | 17.55297693 | 15.20344886 | 2.712870309 | 3.332590676 |
| ASGR1     | -2.11488573  | 0.000359747 | 0.00293637  | 9.168670287 | 12.30353665 | 2.019041586 | 1.914768648 |
| KHK       | -2.115041051 | 2.61E-05    | 0.000314046 | 9.403744305 | 7.382473493 | 1.388288201 | 1.702095344 |

|           |              |             |             |             |             |             |             |
|-----------|--------------|-------------|-------------|-------------|-------------|-------------|-------------|
| ZNF697    | -2.11991534  | 1.72E-05    | 0.000222683 | 5.720918021 | 14.0610592  | 1.766740232 | 1.843877547 |
| LOC155060 | -2.122096895 | 0.006575564 | 0.031473287 | 1.959733731 | 5.449198683 | 0.442158123 | 0.922293229 |
| SSBP3     | -2.125327747 | 6.01E-12    | 3.82E-10    | 34.71338026 | 66.2594791  | 9.02040416  | 9.358334293 |
| SNHG14    | -2.125591968 | 0.005268152 | 0.026379148 | 3.135103822 | 1.934153572 | 0.694459477 | 0.213382215 |
| STEAP3    | -2.131675133 | 4.35E-17    | 8.08E-15    | 47.32901923 | 72.58656029 | 10.47113695 | 11.27239403 |
| CENPA     | -2.134092813 | 0.006320244 | 0.030585997 | 2.351523761 | 3.515923872 | 0.694459477 | 0.355164418 |
| PLXNA2    | -2.138761412 | 4.67E-08    | 1.21E-06    | 8.855238263 | 15.37920112 | 3.028247002 | 1.276748736 |
| SIRPB2    | -2.139313244 | 0.00250865  | 0.0144405   | 9.560460317 | 2.461410339 | 0.505233461 | 1.702095344 |
| CBFA2T3   | -2.139811216 | 0.002578062 | 0.014740886 | 2.900029804 | 2.988667105 | 0.694459477 | 0.355164418 |
| KIF2C     | -2.142652859 | 1.35E-06    | 2.47E-05    | 8.541806238 | 10.01875733 | 1.703664893 | 1.631204243 |
| ABCC3     | -2.152611245 | 1.08E-12    | 8.26E-11    | 52.1872156  | 99.8281599  | 14.88641064 | 12.19397835 |
| CR1       | -2.154503564 | 0.0086216   | 0.03896596  | 1.803017719 | 5.712827066 | 0.631384138 | 0.709619925 |
| CCNB1     | -2.154519006 | 4.16E-09    | 1.43E-07    | 14.65373071 | 20.65176879 | 2.839020986 | 3.474372879 |
| ATP2A3    | -2.167694677 | 4.60E-08    | 1.19E-06    | 47.95588328 | 153.3447217 | 17.85095155 | 17.72348426 |
| MCM2      | -2.167816277 | 4.41E-14    | 4.57E-12    | 27.89623373 | 26.7152216  | 4.100527756 | 5.60110592  |
| S100B     | -2.178247795 | 2.94E-06    | 4.90E-05    | 12.06791651 | 5.361322555 | 1.640589555 | 1.418530939 |
| SYT1      | -2.179615492 | 0.000286435 | 0.002424369 | 2.97838781  | 6.855216727 | 1.199062185 | 0.496946621 |
| PDE2A     | -2.186772486 | 0.005932679 | 0.029081009 | 1.724659713 | 2.461410339 | 0.505233461 | 0.213382215 |
| HSPA7     | -2.190620902 | 4.15E-19    | 1.20E-16    | 101.3960434 | 89.98603359 | 19.68013637 | 13.47001817 |
| WDR90     | -2.195337823 | 2.94E-06    | 4.90E-05    | 10.34404038 | 13.79743082 | 1.325212862 | 2.907244068 |
| PID1      | -2.196044276 | 4.17E-15    | 5.06E-13    | 94.9706869  | 169.7775576 | 21.76162254 | 24.17457448 |
| TROAP     | -2.198167581 | 6.60E-05    | 0.000707574 | 6.426140075 | 7.030968982 | 1.325212862 | 0.99318433  |
| VCAN      | -2.199167578 | 0.000258705 | 0.002210404 | 6.974646118 | 21.17902555 | 1.577514216 | 3.332590676 |
| RGS14     | -2.203203749 | 2.28E-08    | 6.27E-07    | 26.87757965 | 17.2245998  | 3.785151064 | 3.828828385 |
| XYLB      | -2.209378764 | 0.009965784 | 0.043806343 | 0.706005634 | 2.81291485  | 0.316007446 | 0.284273317 |
| ABCB5     | -2.218160793 | 0.001061202 | 0.007129515 | 2.194807749 | 10.19450958 | 1.514438878 | 0.567837722 |
| GAPLINC   | -2.218580767 | 7.47E-08    | 1.86E-06    | 4.937337961 | 5.624950938 | 1.009836169 | 0.780511026 |



|            |              |             |             |             |             |             |             |
|------------|--------------|-------------|-------------|-------------|-------------|-------------|-------------|
| NTSR1      | -2.219996451 | 1.34E-06    | 2.47E-05    | 5.094053973 | 10.54601409 | 1.577514216 | 1.064075432 |
| TMEM163    | -2.222159923 | 0.008268818 | 0.037749861 | 2.586597779 | 10.10663345 | 0.757534815 | 1.418530939 |
| PPM1H      | -2.228816069 | 3.94E-07    | 8.37E-06    | 5.720918021 | 12.12778439 | 1.262137524 | 1.772986445 |
| GEM        | -2.229292465 | 0.006385504 | 0.030812823 | 0.706005634 | 5.273446427 | 0.379082784 | 0.638728823 |
| LINC00094  | -2.233619286 | 1.09E-07    | 2.61E-06    | 9.011954275 | 12.03990827 | 1.514438878 | 2.056550851 |
| CELSR1     | -2.234548992 | 4.08E-10    | 1.75E-08    | 24.99698751 | 55.27496313 | 5.992787912 | 7.586056758 |
| IGIP       | -2.239359276 | 0.002989673 | 0.016638632 | 2.194807749 | 2.988667105 | 0.379082784 | 0.496946621 |
| SEMA4B     | -2.251743238 | 7.50E-08    | 1.87E-06    | 25.62385156 | 77.59549958 | 7.001993328 | 10.27991861 |
| GOLGA8A    | -2.255086834 | 2.73E-06    | 4.61E-05    | 6.347782069 | 17.40035206 | 1.892890909 | 2.056550851 |
| FAM13A-AS1 | -2.268949764 | 1.03E-05    | 0.000145047 | 8.150016208 | 7.997606388 | 1.514438878 | 1.134966533 |
| BRCA1      | -2.274087    | 6.96E-06    | 0.000103797 | 8.385090226 | 9.755128943 | 0.757534815 | 2.269224155 |
| LRP5L      | -2.274931417 | 0.000103542 | 0.001024139 | 5.877634033 | 5.888579322 | 1.072911508 | 0.851402128 |
| MET        | -2.279145331 | 0.001594334 | 0.00989584  | 1.489585695 | 4.306809022 | 0.252932107 | 0.709619925 |
| TK1        | -2.285118393 | 4.91E-14    | 4.95E-12    | 51.01184551 | 36.99672855 | 7.254294682 | 7.089819049 |
| ST6GALNAC4 | -2.287425312 | 5.75E-13    | 4.77E-11    | 19.19849506 | 35.85433889 | 4.478979787 | 4.466848298 |
| TMEM119    | -2.288020737 | 6.54E-23    | 4.11E-20    | 56.41854793 | 70.3896571  | 11.60649304 | 8.932987685 |
| PLAU       | -2.289053261 | 2.30E-11    | 1.30E-09    | 115.4221265 | 317.8488329 | 38.09813521 | 32.18526894 |
| NIPAL4     | -2.290046991 | 0.000817883 | 0.00572399  | 1.724659713 | 2.81291485  | 0.379082784 | 0.355164418 |
| DGAT2      | -2.291466676 | 0.004913319 | 0.024927871 | 2.821671798 | 5.273446427 | 1.072911508 | 0.213382215 |
| MREG       | -2.29312638  | 2.71E-08    | 7.39E-07    | 6.7395721   | 15.29132499 | 1.325212862 | 2.269224155 |
| PRC1       | -2.294231105 | 4.84E-11    | 2.54E-09    | 19.6686431  | 28.64849641 | 3.785151064 | 4.04150169  |
| ATP8B3     | -2.302000617 | 0.005555983 | 0.027519572 | 2.194807749 | 4.482561277 | 0.442158123 | 0.638728823 |
| EHD3       | -2.307770681 | 0.005738561 | 0.028312198 | 0.627647628 | 1.494772933 | 0.000630753 | 0.355164418 |
| DTL        | -2.315548201 | 0.000129957 | 0.001243638 | 5.407485997 | 2.988667105 | 0.505233461 | 0.851402128 |
| SMG1P7     | -2.325595206 | 0.002296079 | 0.013382357 | 2.900029804 | 5.097694172 | 0.694459477 | 0.567837722 |
| MATK       | -2.326133657 | 1.45E-15    | 1.94E-13    | 17.70969295 | 26.18796484 | 3.469774371 | 3.474372879 |
| SRPX2      | -2.32929003  | 0.007950407 | 0.036527324 | 0.78436364  | 5.097694172 | 0.631384138 | 0.284273317 |

|              |              |             |             |             |             |             |             |
|--------------|--------------|-------------|-------------|-------------|-------------|-------------|-------------|
| SCD5         | -2.338977465 | 0.004506396 | 0.023225644 | 1.019437659 | 2.461410339 | 0.000630753 | 0.567837722 |
| REXO5        | -2.3660901   | 0.001788194 | 0.010860867 | 3.840325876 | 1.758401317 | 0.505233461 | 0.355164418 |
| SLC45A3      | -2.369115351 | 3.80E-06    | 6.10E-05    | 5.015695967 | 9.579376688 | 0.379082784 | 1.914768648 |
| MCM10        | -2.370826804 | 0.002038291 | 0.012091732 | 4.623905936 | 2.373534211 | 0.379082784 | 0.709619925 |
| SNHG10       | -2.377129637 | 0.008710116 | 0.039292179 | 1.724659713 | 1.758401317 | 0.316007446 | 0.213382215 |
| GPRIN3       | -2.38016543  | 2.14E-06    | 3.70E-05    | 9.560460317 | 8.436987027 | 1.199062185 | 1.560313141 |
| KCNMB4       | -2.380844741 | 0.00251405  | 0.014465813 | 2.743313791 | 2.988667105 | 0.316007446 | 0.567837722 |
| DDX11        | -2.382621035 | 2.00E-08    | 5.62E-07    | 18.10148298 | 11.5126515  | 1.514438878 | 3.04902627  |
| PHLDA3       | -2.393061095 | 7.56E-08    | 1.87E-06    | 3.605251858 | 6.591588344 | 0.820610154 | 0.709619925 |
| CDCA5        | -2.397536073 | 3.29E-10    | 1.46E-08    | 12.77313856 | 14.32468759 | 1.82981557  | 2.269224155 |
| MZF1         | -2.408304542 | 4.36E-09    | 1.48E-07    | 13.08657059 | 23.551681   | 2.712870309 | 2.765461865 |
| PLK1         | -2.409104693 | 4.29E-09    | 1.47E-07    | 15.98581681 | 33.0423028  | 2.902096325 | 4.466848298 |
| POLQ         | -2.415003971 | 0.001837264 | 0.011102829 | 4.310473912 | 5.185570299 | 0.505233461 | 0.922293229 |
| SFXN2        | -2.420520988 | 0.009839646 | 0.043370845 | 1.254511677 | 0.967516167 | 0.316007446 | 0.000708911 |
| MT1F         | -2.424500769 | 1.57E-05    | 0.000206761 | 10.50075639 | 43.85106652 | 5.551260542 | 2.411006358 |
| LOC105369340 | -2.427465843 | 0.00520615  | 0.026113989 | 0.862721647 | 2.81291485  | 0.12678143  | 0.426055519 |
| THBS1        | -2.434140364 | 1.91E-12    | 1.37E-10    | 196.2875887 | 464.5140901 | 47.87481268 | 49.27002437 |
| LOC101929331 | -2.434859229 | 0.004443694 | 0.023001056 | 2.97838781  | 1.582649061 | 0.252932107 | 0.426055519 |
| HMCN1        | -2.43692105  | 0.008947606 | 0.040125202 | 2.116449743 | 4.746189661 | 0.442158123 | 0.567837722 |
| MERTK        | -2.441244576 | 2.38E-17    | 4.74E-15    | 161.496634  | 329.7121101 | 32.35827941 | 39.62883458 |
| FRY          | -2.446636225 | 0.000606642 | 0.004514934 | 1.881375725 | 6.855216727 | 0.631384138 | 0.638728823 |
| ESPL1        | -2.447451863 | 1.43E-07    | 3.32E-06    | 8.620164244 | 10.63389022 | 1.451363539 | 1.347639837 |
| MST1         | -2.449070873 | 8.08E-05    | 0.000836722 | 4.780621949 | 5.273446427 | 0.883685492 | 0.567837722 |
| SETD9        | -2.458860453 | 0.00914912  | 0.040838526 | 1.803017719 | 2.461410339 | 0.000630753 | 0.638728823 |
| S100A8       | -2.463796219 | 4.83E-12    | 3.09E-10    | 18.80670503 | 36.29371953 | 4.289753772 | 3.616155081 |
| FGFR1        | -2.472243061 | 3.52E-11    | 1.90E-09    | 12.53806455 | 18.8063701  | 2.082116924 | 2.411006358 |
| MMP2-AS1     | -2.474189015 | 0.001894615 | 0.011373209 | 2.038091737 | 4.482561277 | 0.5683088   | 0.355164418 |

|             |              |             |             |             |             |             |             |
|-------------|--------------|-------------|-------------|-------------|-------------|-------------|-------------|
| ENO3        | -2.482615292 | 9.03E-07    | 1.74E-05    | 7.758226178 | 11.95203214 | 1.514438878 | 1.276748736 |
| KIF20A      | -2.492203641 | 0.001277808 | 0.00832884  | 4.702263942 | 6.240083833 | 0.631384138 | 0.922293229 |
| LHX4-AS1    | -2.507180733 | 0.000153306 | 0.001431948 | 4.54554793  | 5.097694172 | 0.442158123 | 0.922293229 |
| LINC02035   | -2.50784288  | 7.80E-05    | 0.000813103 | 3.526893852 | 7.11884511  | 0.442158123 | 1.064075432 |
| KIAA0319    | -2.508113981 | 0.007299627 | 0.034135102 | 2.429881767 | 9.052119921 | 0.820610154 | 0.780511026 |
| CENPF       | -2.510539221 | 4.22E-07    | 8.89E-06    | 7.601510166 | 14.93982048 | 1.577514216 | 1.560313141 |
| SPAG5       | -2.515574487 | 3.44E-11    | 1.87E-09    | 15.35895276 | 14.41256371 | 2.145192263 | 1.98565975  |
| MIR3142HG   | -2.516155601 | 0.005981227 | 0.029279203 | 1.097795665 | 1.758401317 | 0.379082784 | 0.000708911 |
| RASAL2      | -2.522499496 | 2.26E-08    | 6.24E-07    | 9.090312281 | 22.49716747 | 1.82981557  | 2.552788561 |
| COL6A1      | -2.533232115 | 3.61E-14    | 3.86E-12    | 8.071658202 | 13.97318308 | 1.199062185 | 1.843877547 |
| CDC20       | -2.537038061 | 5.96E-09    | 1.97E-07    | 16.37760684 | 25.04557517 | 1.892890909 | 3.828828385 |
| CELSR2      | -2.537283524 | 0.002868847 | 0.016084045 | 1.803017719 | 2.109905828 | 0.252932107 | 0.284273317 |
| MORN4       | -2.53821394  | 0.005446778 | 0.027076286 | 1.332869683 | 2.988667105 | 0.5683088   | 0.000708911 |
| C11orf80    | -2.538381382 | 0.006374552 | 0.030776566 | 1.019437659 | 2.988667105 | 0.000630753 | 0.567837722 |
| MSH5-SAPCD1 | -2.543568578 | 2.08E-05    | 0.000259792 | 13.2432866  | 7.90973026  | 2.334418278 | 0.496946621 |
| AKR1C2      | -2.552439641 | 0.007402822 | 0.034528157 | 1.724659713 | 5.712827066 | 0.442158123 | 0.567837722 |
| IL1B        | -2.554544829 | 0.005132888 | 0.025809306 | 69.26926092 | 426.9031074 | 45.47794982 | 21.12625712 |
| CD300LB     | -2.556520802 | 8.14E-10    | 3.25E-08    | 6.504498081 | 9.843005071 | 1.135986847 | 1.064075432 |
| KIF15       | -2.559378794 | 0.003152101 | 0.017396806 | 3.683609864 | 3.340171616 | 0.252932107 | 0.709619925 |
| UBE2C       | -2.559892255 | 7.28E-11    | 3.70E-09    | 13.79179264 | 14.58831597 | 1.577514216 | 2.269224155 |
| FLNB        | -2.560479687 | 1.04E-11    | 6.35E-10    | 31.343986   | 84.44983754 | 6.434315281 | 9.21655209  |
| XRRA1       | -2.561474484 | 2.08E-06    | 3.61E-05    | 11.20597844 | 6.767340599 | 0.883685492 | 1.560313141 |
| PDK1        | -2.568277135 | 7.84E-07    | 1.54E-05    | 3.76196787  | 8.788491538 | 0.694459477 | 0.99318433  |
| N4BP2L2-IT2 | -2.570124147 | 0.001071798 | 0.007183983 | 3.918683882 | 3.076543233 | 0.442158123 | 0.496946621 |
| FGFRL1      | -2.572184292 | 2.55E-07    | 5.64E-06    | 9.717176329 | 32.16354152 | 2.082116924 | 3.54526398  |
| GTSE1       | -2.578790553 | 8.34E-05    | 0.000858466 | 6.269424063 | 9.49150056  | 0.631384138 | 1.48942204  |
| B3GALNT1    | -2.580635568 | 2.09E-05    | 0.00026066  | 3.37017784  | 5.712827066 | 0.5683088   | 0.638728823 |

|          |              |             |             |             |             |             |             |
|----------|--------------|-------------|-------------|-------------|-------------|-------------|-------------|
| ARHGAP32 | -2.580964399 | 0.000996171 | 0.006768238 | 2.194807749 | 9.315748304 | 0.946760831 | 0.567837722 |
| SLC9B1   | -2.591311549 | 0.001568785 | 0.009762455 | 1.411227689 | 1.670525189 | 0.000630753 | 0.426055519 |
| TFCP2L1  | -2.60527032  | 0.001796784 | 0.010899283 | 0.862721647 | 2.197781955 | 0.379082784 | 0.000708911 |
| C15orf52 | -2.605633655 | 1.64E-06    | 2.91E-05    | 6.269424063 | 11.07327086 | 1.325212862 | 0.922293229 |
| VASH1    | -2.607105004 | 9.86E-18    | 2.23E-15    | 80.39609778 | 175.577382  | 17.85095155 | 15.45496901 |
| EFHC1    | -2.611731115 | 0.002728923 | 0.015425415 | 2.900029804 | 3.428047744 | 0.000630753 | 0.851402128 |
| KIF18B   | -2.622004918 | 1.37E-05    | 0.000184745 | 5.720918021 | 8.70061541  | 1.135986847 | 0.709619925 |
| RECQL4   | -2.624109369 | 8.19E-11    | 4.14E-09    | 19.27685307 | 11.77627988 | 2.019041586 | 1.98565975  |
| STX1A    | -2.625243405 | 4.24E-07    | 8.91E-06    | 9.638818323 | 29.35150543 | 2.397493617 | 2.623679662 |
| MAOA     | -2.632318087 | 2.99E-08    | 8.00E-07    | 6.974646118 | 15.11557274 | 1.009836169 | 1.843877547 |
| KIFC3    | -2.641129711 | 2.40E-17    | 4.74E-15    | 89.48562648 | 160.8141926 | 18.4186296  | 13.32823597 |
| PIF1     | -2.643034822 | 0.00193288  | 0.011564423 | 2.900029804 | 3.955304511 | 0.379082784 | 0.496946621 |
| MT1X     | -2.648008483 | 8.21E-11    | 4.14E-09    | 24.68355548 | 59.22938887 | 6.118938589 | 4.466848298 |
| NOTCH3   | -2.648421055 | 1.49E-08    | 4.33E-07    | 12.45970654 | 34.6240731  | 2.712870309 | 3.261699574 |
| CDCA2    | -2.651630726 | 0.0076241   | 0.035286526 | 3.135103822 | 2.285658083 | 0.000630753 | 0.709619925 |
| TOP2A    | -2.661559263 | 3.05E-09    | 1.08E-07    | 14.41865669 | 18.36698946 | 1.325212862 | 2.836352966 |
| CYP27A1  | -2.670505193 | 6.84E-22    | 3.37E-19    | 892.0283243 | 1515.776207 | 160.2750659 | 139.7270697 |
| EME1     | -2.67825964  | 0.001091426 | 0.007298598 | 3.056745816 | 3.340171616 | 0.5683088   | 0.213382215 |
| APBA1    | -2.678716535 | 1.63E-06    | 2.90E-05    | 4.623905936 | 14.32468759 | 1.009836169 | 1.347639837 |
| KIF24    | -2.689958186 | 0.000143141 | 0.001350732 | 4.780621949 | 3.955304511 | 0.379082784 | 0.709619925 |
| WDR34    | -2.692672258 | 3.98E-12    | 2.59E-10    | 16.53432285 | 14.41256371 | 1.955966247 | 1.843877547 |
| SEMA3A   | -2.693338033 | 0.002440857 | 0.014123497 | 1.411227689 | 1.846277444 | 0.252932107 | 0.142491114 |
| BIRC5    | -2.698036924 | 2.08E-11    | 1.20E-09    | 14.26194068 | 21.88203457 | 1.955966247 | 2.481897459 |
| SEMA6B   | -2.701719664 | 1.27E-27    | 1.83E-24    | 456.1227367 | 632.0059896 | 68.058921   | 64.72428447 |
| E2F2     | -2.738087895 | 3.43E-09    | 1.20E-07    | 9.168670287 | 9.930881199 | 1.072911508 | 1.205857634 |
| TMEM71   | -2.742420625 | 0.002146402 | 0.012632436 | 2.97838781  | 3.076543233 | 0.694459477 | 0.000708911 |
| TICRR    | -2.758463715 | 0.005651582 | 0.027940385 | 1.959733731 | 4.482561277 | 0.000630753 | 0.780511026 |

|          |              |             |             |             |             |             |             |
|----------|--------------|-------------|-------------|-------------|-------------|-------------|-------------|
| RBP1     | -2.762958922 | 2.73E-05    | 0.000327207 | 2.586597779 | 5.976455449 | 0.5683088   | 0.426055519 |
| CD276    | -2.763867335 | 3.31E-35    | 1.19E-31    | 121.925841  | 139.7239219 | 18.04017757 | 12.40665165 |
| C14orf79 | -2.767622175 | 0.001193758 | 0.007854777 | 2.194807749 | 3.428047744 | 0.631384138 | 0.000708911 |
| FAM111B  | -2.770200087 | 8.51E-06    | 0.000122843 | 9.403744305 | 7.382473493 | 0.631384138 | 1.347639837 |
| KANK1    | -2.772312707 | 2.22E-08    | 6.14E-07    | 8.541806238 | 29.08787705 | 1.703664893 | 2.694570763 |
| CDCA7    | -2.775014089 | 0.004242531 | 0.022190636 | 2.351523761 | 1.758401317 | 0.000630753 | 0.496946621 |
| FABP4    | -2.813909275 | 1.01E-10    | 4.96E-09    | 15.75074279 | 25.04557517 | 2.334418278 | 2.269224155 |
| TSEN2    | -2.847773607 | 0.000900715 | 0.006204401 | 4.310473912 | 2.197781955 | 0.694459477 | 0.000708911 |
| E2F1     | -2.852063796 | 8.25E-12    | 5.15E-10    | 17.1611869  | 12.12778439 | 1.199062185 | 2.056550851 |
| C16orf45 | -2.856112931 | 2.65E-05    | 0.000318384 | 3.213461828 | 3.428047744 | 0.5683088   | 0.142491114 |
| HAMP     | -2.863861232 | 3.36E-07    | 7.26E-06    | 16.22089083 | 9.227872177 | 1.82981557  | 0.922293229 |
| HTRA4    | -2.864772016 | 5.48E-06    | 8.42E-05    | 2.194807749 | 5.800703194 | 0.442158123 | 0.426055519 |
| TNFSF14  | -2.879077539 | 1.85E-05    | 0.000235766 | 4.232115906 | 11.86415601 | 0.883685492 | 0.851402128 |
| CASS4    | -2.889096207 | 1.77E-06    | 3.12E-05    | 4.858979955 | 5.097694172 | 0.5683088   | 0.496946621 |
| TRIP13   | -2.891590711 | 0.000509635 | 0.003918243 | 5.094053973 | 7.11884511  | 0.000630753 | 1.347639837 |
| IL1A     | -2.898762196 | 0.00129349  | 0.008415848 | 1.489585695 | 2.285658083 | 0.189856769 | 0.213382215 |
| PPP1R3G  | -2.900194521 | 0.003267163 | 0.017872793 | 0.941079653 | 1.582649061 | 0.12678143  | 0.142491114 |
| VNN2     | -2.909144869 | 0.006300592 | 0.030511357 | 1.646301707 | 16.52159078 | 1.199062185 | 0.709619925 |
| DNAAF4   | -2.910694583 | 0.002948425 | 0.016434425 | 1.411227689 | 1.143268422 | 0.000630753 | 0.284273317 |
| CAMKK1   | -2.915524424 | 2.35E-16    | 3.53E-14    | 19.7470011  | 29.08787705 | 2.649794971 | 2.481897459 |
| NCS1     | -2.922651128 | 1.68E-13    | 1.55E-11    | 26.32907361 | 81.37417307 | 5.740486558 | 5.530214819 |
| WEE1     | -2.933343462 | 1.12E-05    | 0.000155684 | 3.76196787  | 3.955304511 | 0.379082784 | 0.426055519 |
| KIF4A    | -2.937119186 | 3.87E-05    | 0.000442969 | 3.056745816 | 6.591588344 | 0.5683088   | 0.426055519 |
| FLRT2    | -2.948908176 | 3.76E-05    | 0.000430644 | 3.213461828 | 7.206721238 | 0.505233461 | 0.567837722 |
| SMOX     | -2.956060426 | 1.06E-11    | 6.43E-10    | 22.01938328 | 68.72001067 | 4.605130464 | 4.679521602 |
| CENPM    | -2.957497611 | 1.07E-09    | 4.20E-08    | 13.40000261 | 11.16114699 | 1.766740232 | 0.709619925 |
| LIF      | -2.995597722 | 0.000212303 | 0.001876142 | 5.485844003 | 27.24247837 | 1.82981557  | 1.418530939 |

|           |              |             |             |             |             |             |             |
|-----------|--------------|-------------|-------------|-------------|-------------|-------------|-------------|
| PKMYT1    | -2.995701307 | 1.46E-12    | 1.09E-10    | 18.88506304 | 18.27911334 | 2.586719632 | 1.064075432 |
| KIFC1     | -3.002705973 | 4.93E-15    | 5.93E-13    | 19.98207512 | 21.0032733  | 2.27134294  | 1.772986445 |
| WNT2B     | -3.005070664 | 0.009933518 | 0.043697404 | 1.254511677 | 1.406896806 | 0.252932107 | 0.000708911 |
| SV2B      | -3.006515475 | 4.85E-06    | 7.58E-05    | 2.743313791 | 6.064331577 | 0.442158123 | 0.426055519 |
| SERPINE1  | -3.021639719 | 0.000118792 | 0.00114976  | 23.74325941 | 123.9062189 | 7.821972728 | 6.593581339 |
| CDT1      | -3.037381423 | 2.57E-12    | 1.75E-10    | 19.90371711 | 13.62167856 | 2.145192263 | 1.064075432 |
| CEBPB-AS1 | -3.050903076 | 0.004168346 | 0.021849967 | 2.508239773 | 3.076543233 | 0.252932107 | 0.284273317 |
| RASAL1    | -3.055761041 | 6.26E-10    | 2.57E-08    | 11.36269446 | 40.07239302 | 2.965171663 | 1.914768648 |
| MKI67     | -3.065932171 | 8.94E-20    | 3.00E-17    | 44.19469899 | 54.39620185 | 3.53284971  | 5.884670325 |
| EGR1      | -3.068309721 | 1.53E-19    | 4.85E-17    | 54.61631379 | 96.6646193  | 8.641952129 | 5.60110592  |
| DIRAS1    | -3.074352746 | 0.000233178 | 0.002036917 | 2.351523761 | 1.846277444 | 0.379082784 | 0.000708911 |
| LAMB3     | -3.07653659  | 1.44E-16    | 2.28E-14    | 31.50070201 | 74.69558736 | 4.289753772 | 5.742888123 |
| EXO1      | -3.077483986 | 0.000817033 | 0.005720817 | 2.900029804 | 2.900790978 | 0.000630753 | 0.567837722 |
| VNN1      | -3.078817754 | 1.51E-06    | 2.71E-05    | 2.900029804 | 7.733978005 | 0.631384138 | 0.355164418 |
| TPST1     | -3.080134684 | 2.20E-06    | 3.79E-05    | 4.075399894 | 11.5126515  | 0.883685492 | 0.567837722 |
| DLGAP5    | -3.089872458 | 1.91E-05    | 0.000242551 | 4.702263942 | 5.976455449 | 0.631384138 | 0.355164418 |
| SLC28A3   | -3.092516018 | 0.000728654 | 0.00525235  | 1.019437659 | 1.846277444 | 0.252932107 | 0.000708911 |
| ZMIZ1-AS1 | -3.095856904 | 9.55E-17    | 1.60E-14    | 24.13504944 | 47.36611163 | 2.839020986 | 3.828828385 |
| C21orf58  | -3.099682234 | 0.000786073 | 0.005568887 | 2.664955785 | 4.39468515  | 0.631384138 | 0.000708911 |
| SHROOM1   | -3.102433668 | 0.000137799 | 0.001307411 | 4.1537579   | 3.691676127 | 0.5683088   | 0.142491114 |
| MYBL2     | -3.128473282 | 3.84E-23    | 2.52E-20    | 24.9186295  | 25.04557517 | 2.334418278 | 2.198333054 |
| MANEAL    | -3.129381293 | 3.93E-08    | 1.03E-06    | 5.564202009 | 5.449198683 | 0.5683088   | 0.426055519 |
| PLB1      | -3.145829201 | 2.36E-13    | 2.09E-11    | 9.482102311 | 12.12778439 | 0.946760831 | 0.99318433  |
| SLC2A5    | -3.157050334 | 2.69E-25    | 2.43E-22    | 49.05289536 | 32.95442667 | 3.09132234  | 4.254174994 |
| SPC24     | -3.16293119  | 2.92E-08    | 7.85E-07    | 7.13136213  | 9.403624432 | 0.820610154 | 0.638728823 |
| CBX7      | -3.164497376 | 1.26E-08    | 3.76E-07    | 5.955992039 | 10.01875733 | 0.442158123 | 0.99318433  |
| PIMREG    | -3.195157454 | 0.000580463 | 0.004346995 | 2.664955785 | 4.131056766 | 0.5683088   | 0.000708911 |

|          |              |             |             |             |             |             |             |
|----------|--------------|-------------|-------------|-------------|-------------|-------------|-------------|
| PALLD    | -3.208452049 | 0.000394952 | 0.003162907 | 14.4970147  | 69.4230197  | 1.82981557  | 5.459323717 |
| RRM2     | -3.225516228 | 7.01E-22    | 3.37E-19    | 33.45965216 | 36.11796727 | 2.334418278 | 3.616155081 |
| DCHS1    | -3.235860978 | 2.56E-05    | 0.000309177 | 4.467189924 | 3.428047744 | 0.379082784 | 0.284273317 |
| CRIM1    | -3.263672788 | 8.54E-07    | 1.65E-05    | 5.720918021 | 39.19363174 | 1.262137524 | 2.481897459 |
| NDRG2    | -3.269429093 | 1.70E-05    | 0.000221269 | 1.332869683 | 10.8975186  | 0.442158123 | 0.567837722 |
| ASIC1    | -3.273633226 | 2.96E-05    | 0.000349718 | 2.038091737 | 5.976455449 | 0.631384138 | 0.000708911 |
| AURKB    | -3.287686885 | 9.83E-12    | 6.01E-10    | 12.77313856 | 13.35805018 | 1.325212862 | 0.780511026 |
| KCNN4    | -3.311438509 | 1.83E-23    | 1.25E-20    | 79.69087572 | 194.0313689 | 10.97573965 | 10.91793852 |
| IGSF3    | -3.318142529 | 0.001648035 | 0.010172279 | 1.097795665 | 1.406896806 | 0.189856769 | 0.000708911 |
| CACNA2D3 | -3.318629405 | 1.18E-15    | 1.59E-13    | 16.06417482 | 14.0610592  | 1.325212862 | 1.064075432 |
| PCBP3    | -3.368350375 | 0.006216499 | 0.030208474 | 1.176153671 | 2.373534211 | 0.000630753 | 0.284273317 |
| BUB1B    | -3.376366487 | 5.77E-05    | 0.000623051 | 4.1537579   | 6.591588344 | 0.000630753 | 0.851402128 |
| POU6F1   | -3.395508828 | 2.57E-06    | 4.36E-05    | 3.213461828 | 4.834065788 | 0.12678143  | 0.496946621 |
| RAD54L   | -3.410761103 | 1.51E-07    | 3.50E-06    | 5.877634033 | 5.712827066 | 0.505233461 | 0.355164418 |
| MT1G     | -3.41726428  | 0.005199993 | 0.026092178 | 5.407485997 | 40.07239302 | 2.902096325 | 0.426055519 |
| CLEC5A   | -3.436866127 | 9.26E-08    | 2.26E-06    | 122.004199  | 343.9480428 | 10.21883559 | 24.24546558 |
| SEMA4C   | -3.440836487 | 1.51E-10    | 7.24E-09    | 10.89254642 | 17.66398044 | 0.694459477 | 1.418530939 |
| ACOT11   | -3.445863648 | 1.64E-18    | 4.22E-16    | 16.29924884 | 34.36044472 | 1.514438878 | 2.198333054 |
| ZNRF3    | -3.452483523 | 0.003710304 | 0.019823547 | 1.411227689 | 1.319020678 | 0.189856769 | 0.000708911 |
| DPYSL3   | -3.470510289 | 7.70E-05    | 0.000804205 | 1.332869683 | 27.41823062 | 1.199062185 | 0.851402128 |
| BCAR1    | -3.470958914 | 2.18E-07    | 4.89E-06    | 3.526893852 | 2.988667105 | 0.252932107 | 0.213382215 |
| GPR27    | -3.476760203 | 0.000387429 | 0.003114758 | 2.429881767 | 3.164419361 | 0.252932107 | 0.142491114 |
| ACOX2    | -3.510588921 | 0.000417324 | 0.003316202 | 1.803017719 | 3.076543233 | 0.000630753 | 0.355164418 |
| CTNNAL1  | -3.53561567  | 0.00030717  | 0.002568236 | 1.724659713 | 4.043180638 | 0.379082784 | 0.000708911 |
| HTR7     | -3.539871266 | 1.55E-08    | 4.47E-07    | 5.955992039 | 25.30920356 | 1.135986847 | 0.99318433  |
| GJB2     | -3.540068915 | 0.006370685 | 0.030768192 | 1.724659713 | 6.064331577 | 0.316007446 | 0.213382215 |
| HJURP    | -3.545115589 | 3.04E-09    | 1.08E-07    | 7.444794154 | 8.349110899 | 0.379082784 | 0.709619925 |

|              |              |             |             |             |             |             |             |
|--------------|--------------|-------------|-------------|-------------|-------------|-------------|-------------|
| MARCO        | -3.554173214 | 1.61E-15    | 2.13E-13    | 64.41106455 | 116.6125003 | 6.749691974 | 5.459323717 |
| CIRBP-AS1    | -3.558170859 | 0.001625355 | 0.010045181 | 1.019437659 | 1.934153572 | 0.189856769 | 0.000708911 |
| SLC9A3-AS1   | -3.564888712 | 0.000306594 | 0.002564905 | 1.567943701 | 7.206721238 | 0.5683088   | 0.000708911 |
| CDC6         | -3.597841161 | 1.13E-06    | 2.13E-05    | 4.388831918 | 3.867428383 | 0.000630753 | 0.567837722 |
| SPC25        | -3.600292981 | 0.000144988 | 0.001362711 | 2.97838781  | 3.252295489 | 0.000630753 | 0.426055519 |
| PAQR5        | -3.602863522 | 5.67E-10    | 2.35E-08    | 6.426140075 | 29.61513382 | 0.883685492 | 1.48942204  |
| PCOLCE2      | -3.621905092 | 4.65E-07    | 9.64E-06    | 3.918683882 | 30.23026671 | 1.135986847 | 1.064075432 |
| FAM57A       | -3.633645829 | 1.24E-05    | 0.000168524 | 2.821671798 | 4.39468515  | 0.442158123 | 0.000708911 |
| TREML1       | -3.642085049 | 0.000242705 | 0.002099804 | 1.019437659 | 3.252295489 | 0.000630753 | 0.284273317 |
| MMP8         | -3.655888606 | 0.009226274 | 0.041119321 | 0.470931616 | 3.691676127 | 0.252932107 | 0.000708911 |
| ZNF554       | -3.662259704 | 0.000554423 | 0.004195529 | 2.038091737 | 2.285658083 | 0.000630753 | 0.284273317 |
| GAS6-AS1     | -3.663139549 | 0.004836355 | 0.024590238 | 1.567943701 | 1.582649061 | 0.189856769 | 0.000708911 |
| COL7A1       | -3.664491513 | 7.34E-05    | 0.000774457 | 2.273165755 | 8.173358643 | 0.631384138 | 0.000708911 |
| ACO1         | -3.685589473 | 6.43E-16    | 9.10E-14    | 18.57163101 | 72.76231255 | 2.397493617 | 3.261699574 |
| FOLR3        | -3.754750314 | 0.000151949 | 0.001421111 | 26.1723576  | 3.515923872 | 0.694459477 | 1.064075432 |
| MINCR        | -3.759748514 | 0.006818524 | 0.032367801 | 0.941079653 | 1.319020678 | 0.12678143  | 0.000708911 |
| LOC101928143 | -3.771053316 | 0.000639171 | 0.004704474 | 0.941079653 | 3.6038      | 0.252932107 | 0.000708911 |
| TXLNB        | -3.783563275 | 1.99E-11    | 1.15E-09    | 7.444794154 | 8.788491538 | 0.442158123 | 0.496946621 |
| AKR1C3       | -3.834156882 | 2.77E-07    | 6.06E-06    | 5.564202009 | 9.930881199 | 0.5683088   | 0.284273317 |
| SNRPN        | -3.866354792 | 0.000545978 | 0.004142487 | 26.64250563 | 5.712827066 | 1.451363539 | 0.284273317 |
| SORL1        | -3.874571099 | 3.81E-30    | 9.16E-27    | 38.31784853 | 61.77779658 | 2.523644294 | 2.907244068 |
| MARCKSL1     | -3.920025691 | 1.95E-27    | 2.34E-24    | 60.33644823 | 139.7239219 | 5.046657834 | 5.459323717 |
| CDCA3        | -3.921269077 | 6.65E-06    | 9.98E-05    | 3.37017784  | 4.39468515  | 0.000630753 | 0.426055519 |
| SLC46A2      | -3.932565236 | 1.08E-06    | 2.07E-05    | 3.37017784  | 16.96097142 | 0.757534815 | 0.284273317 |
| AKR1C1       | -3.934317832 | 1.93E-11    | 1.13E-09    | 13.55671863 | 60.98691143 | 1.955966247 | 1.914768648 |
| WNT5A        | -3.940087988 | 6.13E-06    | 9.29E-05    | 3.135103822 | 12.39141278 | 0.379082784 | 0.426055519 |
| LGI2         | -3.964607424 | 1.11E-16    | 1.83E-14    | 26.01564159 | 63.53531914 | 0.946760831 | 3.687046183 |



|           |              |             |             |             |             |             |             |
|-----------|--------------|-------------|-------------|-------------|-------------|-------------|-------------|
| PPBP      | -4.024368356 | 0.000719629 | 0.005200287 | 88.78040442 | 1449.166102 | 47.18098396 | 27.50645625 |
| TYMS      | -4.02694207  | 1.34E-22    | 7.73E-20    | 18.72834702 | 21.0032733  | 1.009836169 | 0.922293229 |
| RAI14     | -4.029877448 | 1.35E-08    | 3.98E-07    | 2.821671798 | 21.9699107  | 0.5683088   | 0.638728823 |
| ENO2      | -4.093584462 | 4.67E-14    | 4.78E-12    | 6.269424063 | 23.99106164 | 0.631384138 | 0.780511026 |
| ST18      | -4.105775513 | 4.02E-05    | 0.0004574   | 1.489585695 | 4.39468515  | 0.000630753 | 0.284273317 |
| SPTBN4    | -4.114059305 | 0.005284878 | 0.026444548 | 0.862721647 | 2.0220297   | 0.12678143  | 0.000708911 |
| MND1      | -4.172401057 | 0.003056262 | 0.016969957 | 1.489585695 | 1.582649061 | 0.000630753 | 0.142491114 |
| CDC45     | -4.185020211 | 3.57E-11    | 1.91E-09    | 10.10896636 | 8.436987027 | 0.12678143  | 0.709619925 |
| UHRF1     | -4.185696702 | 1.72E-16    | 2.67E-14    | 13.00821258 | 17.8397327  | 0.379082784 | 0.99318433  |
| PKIA      | -4.214555705 | 0.007652703 | 0.035368276 | 0.549289622 | 0.000878761 | 0.000630753 | 0.000708911 |
| ESCO2     | -4.219334579 | 3.67E-05    | 0.000421643 | 2.664955785 | 3.691676127 | 0.000630753 | 0.284273317 |
| SCG5      | -4.262232733 | 1.49E-06    | 2.68E-05    | 1.097795665 | 5.361322555 | 0.252932107 | 0.000708911 |
| FCAR      | -4.395466008 | 3.40E-11    | 1.86E-09    | 5.955992039 | 40.24814528 | 0.757534815 | 0.99318433  |
| OXER1     | -4.542785567 | 5.05E-06    | 7.87E-05    | 2.586597779 | 5.273446427 | 0.12678143  | 0.142491114 |
| MMP1      | -4.548323727 | 0.00699487  | 0.033031075 | 0.706005634 | 0.000878761 | 0.000630753 | 0.000708911 |
| MIR210HG  | -4.559720103 | 1.11E-07    | 2.66E-06    | 2.900029804 | 11.24902312 | 0.000630753 | 0.496946621 |
| NAT8L     | -4.587137504 | 0.007988166 | 0.036654126 | 0.39257361  | 0.352383272 | 0.000630753 | 0.000708911 |
| PCDHGC3   | -4.608885435 | 0.004116629 | 0.0216577   | 0.39257361  | 24.69407066 | 0.189856769 | 0.638728823 |
| STXBP1    | -4.613485793 | 4.21E-06    | 6.67E-05    | 2.194807749 | 4.043180638 | 0.000630753 | 0.213382215 |
| MLXIPL    | -4.615551278 | 8.43E-14    | 8.16E-12    | 8.933596269 | 15.90645789 | 0.316007446 | 0.496946621 |
| LINC01963 | -4.651428007 | 0.000209853 | 0.001860841 | 0.941079653 | 3.340171616 | 0.000630753 | 0.142491114 |
| SLIT3     | -4.74511777  | 0.008739374 | 0.039411846 | 0.39257361  | 0.4402594   | 0.000630753 | 0.000708911 |
| TMPRSS5   | -4.804878624 | 0.009135603 | 0.040790806 | 0.00078358  | 0.879640039 | 0.000630753 | 0.000708911 |
| CD1A      | -4.822532263 | 0.007538353 | 0.035024462 | 0.862721647 | 0.000878761 | 0.000630753 | 0.000708911 |
| AFAP1L1   | -4.832657067 | 0.004106753 | 0.02161362  | 0.862721647 | 0.000878761 | 0.000630753 | 0.000708911 |
| ADGRE4P   | -4.840115068 | 4.63E-05    | 0.000516474 | 1.646301707 | 3.164419361 | 0.12678143  | 0.000708911 |
| CXCL5     | -4.854593524 | 4.11E-05    | 0.000467809 | 48.03424128 | 793.2586841 | 11.5434177  | 11.55595844 |

|              |              |             |             |             |             |             |             |
|--------------|--------------|-------------|-------------|-------------|-------------|-------------|-------------|
| WWC1         | -4.878798428 | 0.001460744 | 0.009241952 | 0.470931616 | 0.4402594   | 0.000630753 | 0.000708911 |
| DBN1         | -4.983142797 | 0.002699589 | 0.015289546 | 0.706005634 | 0.264507145 | 0.000630753 | 0.000708911 |
| LINC02210    | -4.98692953  | 0.007577076 | 0.035159277 | 0.627647628 | 0.352383272 | 0.000630753 | 0.000708911 |
| ZBED3-AS1    | -4.98877593  | 0.004403291 | 0.022849296 | 0.627647628 | 0.352383272 | 0.000630753 | 0.000708911 |
| LINC01050    | -5.007286563 | 0.002018064 | 0.011989579 | 0.470931616 | 0.528135528 | 0.000630753 | 0.000708911 |
| VWCE         | -5.029349788 | 0.006094214 | 0.029721393 | 0.314215604 | 0.703887783 | 0.000630753 | 0.000708911 |
| GPRC5C       | -5.050543569 | 0.006223895 | 0.030221074 | 0.157499592 | 0.879640039 | 0.000630753 | 0.000708911 |
| NES          | -5.070395745 | 0.005497513 | 0.027309679 | 0.00078358  | 1.055392294 | 0.000630753 | 0.000708911 |
| PCLAF        | -5.107245138 | 3.25E-10    | 1.45E-08    | 6.7395721   | 7.646101877 | 0.316007446 | 0.000708911 |
| PDE4D        | -5.12840348  | 0.003631911 | 0.01946958  | 0.470931616 | 0.616011656 | 0.000630753 | 0.000708911 |
| PWAR6        | -5.129322403 | 0.007191019 | 0.03373654  | 0.470931616 | 0.616011656 | 0.000630753 | 0.000708911 |
| DNAJC3-AS1   | -5.129632021 | 0.009825902 | 0.043336671 | 0.470931616 | 0.616011656 | 0.000630753 | 0.000708911 |
| SLC25A48     | -5.142550379 | 0.00188912  | 0.01134494  | 0.314215604 | 0.791763911 | 0.000630753 | 0.000708911 |
| MYLK         | -5.159832512 | 0.006450085 | 0.030969991 | 0.235857598 | 0.879640039 | 0.000630753 | 0.000708911 |
| OCLN         | -5.290464931 | 0.007461078 | 0.034740232 | 2.743313791 | 0.528135528 | 0.063706092 | 0.000708911 |
| CXADR        | -5.297183715 | 0.004664946 | 0.02386382  | 0.00078358  | 1.23114455  | 0.000630753 | 0.000708911 |
| MEIKIN       | -5.332205075 | 0.00081215  | 0.005699354 | 0.549289622 | 0.703887783 | 0.000630753 | 0.000708911 |
| SORCS2       | -5.361409074 | 0.00345364  | 0.018631583 | 0.314215604 | 0.967516167 | 0.000630753 | 0.000708911 |
| PDGFRA       | -5.397620229 | 0.003923098 | 0.020760627 | 0.00078358  | 1.319020678 | 0.000630753 | 0.000708911 |
| CCL24        | -5.452409521 | 0.001221571 | 0.008002041 | 0.314215604 | 1.055392294 | 0.000630753 | 0.000708911 |
| ANO7         | -5.467268862 | 0.004319468 | 0.022503336 | 0.235857598 | 1.143268422 | 0.000630753 | 0.000708911 |
| STOX2        | -5.494172357 | 0.005252203 | 0.026308412 | 0.00078358  | 1.406896806 | 0.000630753 | 0.000708911 |
| CBARP        | -5.530738487 | 0.002118006 | 0.012480581 | 0.470931616 | 0.967516167 | 0.000630753 | 0.000708911 |
| PPFIA4       | -5.536714018 | 0.001343233 | 0.008657523 | 0.39257361  | 1.055392294 | 0.000630753 | 0.000708911 |
| CD244        | -5.583890847 | 0.006716216 | 0.031955724 | 0.00078358  | 1.494772933 | 0.000630753 | 0.000708911 |
| ADGRA3       | -5.599607732 | 0.000736272 | 0.005291407 | 0.627647628 | 0.879640039 | 0.000630753 | 0.000708911 |
| LOC105371998 | -5.625663423 | 0.003740069 | 0.019960403 | 0.39257361  | 1.143268422 | 0.000630753 | 0.000708911 |

|              |              |             |             |             |             |             |             |
|--------------|--------------|-------------|-------------|-------------|-------------|-------------|-------------|
| SEZ6L2       | -5.638727462 | 0.000519185 | 0.003976836 | 1.176153671 | 0.352383272 | 0.000630753 | 0.000708911 |
| MELTF-AS1    | -5.690252298 | 0.002169826 | 0.012765088 | 0.549289622 | 1.055392294 | 0.000630753 | 0.000708911 |
| L3MBTL1      | -5.696137772 | 0.001865025 | 0.011228645 | 1.332869683 | 0.264507145 | 0.000630753 | 0.000708911 |
| SMIM5        | -5.715839691 | 0.005415951 | 0.026950895 | 1.097795665 | 0.528135528 | 0.000630753 | 0.000708911 |
| SIT1         | -5.718409861 | 0.001232978 | 0.008065777 | 1.097795665 | 0.528135528 | 0.000630753 | 0.000708911 |
| SNRK-AS1     | -5.755382366 | 0.0004035   | 0.003224203 | 3.291819834 | 1.23114455  | 0.063706092 | 0.000708911 |
| MUC20        | -5.757521086 | 1.62E-05    | 0.000212021 | 3.840325876 | 5.361322555 | 0.000630753 | 0.142491114 |
| LGALS12      | -5.810218249 | 0.001730589 | 0.010564353 | 1.724659713 | 0.000878761 | 0.000630753 | 0.000708911 |
| NLGN3        | -5.82700063  | 0.003295797 | 0.017954567 | 0.706005634 | 1.055392294 | 0.000630753 | 0.000708911 |
| SHC3         | -5.846179452 | 0.000209926 | 0.001860841 | 0.314215604 | 1.494772933 | 0.000630753 | 0.000708911 |
| MROH7        | -5.858295829 | 0.000812783 | 0.005699354 | 1.176153671 | 0.616011656 | 0.000630753 | 0.000708911 |
| LOC101929523 | -5.862499982 | 0.008317654 | 0.037930537 | 1.097795665 | 0.703887783 | 0.000630753 | 0.000708911 |
| INCA1        | -5.870086583 | 0.002287505 | 0.013346471 | 1.019437659 | 0.791763911 | 0.000630753 | 0.000708911 |
| N4BP3        | -5.889557045 | 0.003339944 | 0.01813346  | 0.00078358  | 1.846277444 | 0.000630753 | 0.000708911 |
| RBFOX2       | -5.889572818 | 0.000134943 | 0.001282006 | 0.706005634 | 1.143268422 | 0.000630753 | 0.000708911 |
| GLB1L2       | -5.907167597 | 0.000588238 | 0.004396096 | 0.549289622 | 1.319020678 | 0.000630753 | 0.000708911 |
| AKAP3        | -5.931585086 | 0.005135215 | 0.025812015 | 0.314215604 | 1.582649061 | 0.000630753 | 0.000708911 |
| ADSSL1       | -5.944376136 | 0.000743114 | 0.005329956 | 0.941079653 | 0.967516167 | 0.000630753 | 0.000708911 |
| CCDC183-AS1  | -5.95708182  | 0.001509478 | 0.009462763 | 0.78436364  | 1.143268422 | 0.000630753 | 0.000708911 |
| LINC00663    | -5.969591776 | 0.001412768 | 0.009013107 | 0.627647628 | 1.319020678 | 0.000630753 | 0.000708911 |
| SNX22        | -5.983148406 | 0.007110005 | 0.033418853 | 1.254511677 | 0.703887783 | 0.000630753 | 0.000708911 |
| MYLK2        | -6.023767514 | 0.007242051 | 0.033898812 | 0.00078358  | 2.0220297   | 0.000630753 | 0.000708911 |
| SLC9A3       | -6.041401382 | 0.006991803 | 0.0330274   | 0.549289622 | 1.494772933 | 0.000630753 | 0.000708911 |
| PLOD2        | -6.055339286 | 0.000677013 | 0.004939323 | 0.314215604 | 1.758401317 | 0.000630753 | 0.000708911 |
| HSD11B1      | -6.122790223 | 0.001006822 | 0.00682454  | 0.235857598 | 1.934153572 | 0.000630753 | 0.000708911 |
| RPGRIP1L     | -6.146168487 | 0.000541906 | 0.004122429 | 0.706005634 | 1.494772933 | 0.000630753 | 0.000708911 |
| SLC29A2      | -6.153992514 | 0.000212775 | 0.00187871  | 0.549289622 | 1.670525189 | 0.000630753 | 0.000708911 |

|             |              |             |             |             |             |             |             |
|-------------|--------------|-------------|-------------|-------------|-------------|-------------|-------------|
| CCL20       | -6.154901459 | 4.41E-05    | 0.0004966   | 0.941079653 | 10.8975186  | 0.12678143  | 0.000708911 |
| SHANK3      | -6.16470663  | 0.001586432 | 0.009859518 | 0.470931616 | 1.758401317 | 0.000630753 | 0.000708911 |
| ZNF761      | -6.204077416 | 3.38E-06    | 5.50E-05    | 8.30673222  | 4.218932894 | 0.000630753 | 0.142491114 |
| SLC22A1     | -6.22643575  | 6.83E-05    | 0.000728869 | 1.176153671 | 1.143268422 | 0.000630753 | 0.000708911 |
| TMEFF1      | -6.231635642 | 0.002988971 | 0.016638632 | 1.097795665 | 1.23114455  | 0.000630753 | 0.000708911 |
| WDR31       | -6.231642304 | 0.002945416 | 0.016423997 | 1.097795665 | 1.23114455  | 0.000630753 | 0.000708911 |
| EMP2        | -6.233515078 | 0.00015443  | 0.001438718 | 1.959733731 | 0.352383272 | 0.000630753 | 0.000708911 |
| FAM198A     | -6.257472989 | 0.000621827 | 0.004602446 | 0.706005634 | 1.670525189 | 0.000630753 | 0.000708911 |
| LOC399715   | -6.290094167 | 0.001433813 | 0.00910895  | 1.019437659 | 1.406896806 | 0.000630753 | 0.000708911 |
| LINC02201   | -6.321454635 | 0.000193403 | 0.001741106 | 1.332869683 | 1.143268422 | 0.000630753 | 0.000708911 |
| KCNAB3      | -6.456201117 | 0.000352023 | 0.00288639  | 0.706005634 | 2.0220297   | 0.000630753 | 0.000708911 |
| LINC01569   | -6.55112959  | 7.88E-05    | 0.000819829 | 1.411227689 | 1.494772933 | 0.000630753 | 0.000708911 |
| P2RX5       | -6.551317187 | 0.000419806 | 0.003330519 | 1.411227689 | 1.494772933 | 0.000630753 | 0.000708911 |
| SPRY4       | -6.555764591 | 2.83E-05    | 0.00033599  | 0.314215604 | 2.637162594 | 0.000630753 | 0.000708911 |
| FHAD1       | -6.599693492 | 0.000132273 | 0.001262451 | 2.116449743 | 0.879640039 | 0.000630753 | 0.000708911 |
| LRRC32      | -6.620707261 | 0.004286846 | 0.022381866 | 0.941079653 | 2.109905828 | 0.000630753 | 0.000708911 |
| PLXNB3      | -6.681088091 | 2.06E-05    | 0.000257783 | 1.254511677 | 1.934153572 | 0.000630753 | 0.000708911 |
| CELSR3      | -6.699950885 | 0.000285901 | 0.002421266 | 0.941079653 | 2.285658083 | 0.000630753 | 0.000708911 |
| DOCK3       | -6.714204186 | 2.91E-05    | 0.000344762 | 1.411227689 | 1.846277444 | 0.000630753 | 0.000708911 |
| CCDC150     | -6.748988958 | 0.000873885 | 0.006045556 | 2.273165755 | 1.055392294 | 0.000630753 | 0.000708911 |
| CEACAM19    | -6.789700682 | 2.83E-05    | 0.00033599  | 1.411227689 | 2.0220297   | 0.000630753 | 0.000708911 |
| CEACAM21    | -6.820952473 | 0.001844864 | 0.01112546  | 3.056745816 | 0.4402594   | 0.000630753 | 0.000708911 |
| OBSL1       | -6.853157838 | 1.38E-05    | 0.000186145 | 2.508239773 | 1.055392294 | 0.000630753 | 0.000708911 |
| ST3GAL6-AS1 | -6.932319207 | 1.56E-05    | 0.000205205 | 1.332869683 | 2.461410339 | 0.000630753 | 0.000708911 |
| WFDC21P     | -7.146028535 | 8.86E-05    | 0.000897535 | 0.706005634 | 3.691676127 | 0.000630753 | 0.000708911 |
| GFRA2       | -7.283417868 | 0.00034836  | 0.002859602 | 0.00078358  | 4.834065788 | 0.000630753 | 0.000708911 |
| NEK10       | -7.386555863 | 3.43E-05    | 0.000396917 | 1.411227689 | 3.779552255 | 0.000630753 | 0.000708911 |

|                  |              |             |             |             |             |             |             |
|------------------|--------------|-------------|-------------|-------------|-------------|-------------|-------------|
| GOS2             | -7.661034643 | 1.94E-17    | 3.94E-15    | 18.02312497 | 50.70540448 | 0.000630753 | 0.284273317 |
| TMX2-CTNND1      | -7.783935568 | 2.71E-05    | 0.000325707 | 3.135103822 | 3.691676127 | 0.000630753 | 0.000708911 |
| STXBP5-AS1       | -7.797474283 | 3.71E-06    | 5.99E-05    | 1.019437659 | 5.888579322 | 0.000630753 | 0.000708911 |
| TNC              | -7.879208751 | 0.007095291 | 0.033400875 | 0.00078358  | 7.294597366 | 0.000630753 | 0.000708911 |
| NPHP3            | -8.025951211 | 1.58E-07    | 3.63E-06    | 3.683609864 | 4.39468515  | 0.000630753 | 0.000708911 |
| CNIH3            | -8.273370338 | 2.56E-05    | 0.000308823 | 0.627647628 | 8.964243793 | 0.000630753 | 0.000708911 |
| MROH7-TTC4       | -8.540472259 | 4.86E-08    | 1.25E-06    | 4.075399894 | 7.470349621 | 0.000630753 | 0.000708911 |
| CLCN4            | -9.057531732 | 1.45E-08    | 4.23E-07    | 5.877634033 | 10.63389022 | 0.000630753 | 0.000708911 |
| LOC400927-CSNK1E | -22.03867378 | 4.11E-06    | 6.55E-05    | 0.00078358  | 30.84539961 | 0.000630753 | 0.000708911 |
| SERF2-C15ORF63   | -22.36872074 | 2.94E-06    | 4.91E-05    | 0.00078358  | 40.24814528 | 0.000630753 | 0.000708911 |
| SEN3-EIF4A1      | -23.10962353 | 1.37E-06    | 2.50E-05    | 0.00078358  | 70.56540936 | 0.000630753 | 0.000708911 |
